# Supplementary material for: Removing contaminants from databases of draft genomes
Source: PLoS Comput Biol. 2018 Jun 25;14(6):e1006277. doi: 10.1371/journal.pcbi.1006277 (PMC6034898; doi:10.1371/journal.pcbi.1006277)
Supplement: S1 Table — This table lists all genomes used to filter the Eukaryotic Pathogen genomes, including genome accessions, taxonomy IDs, species names, and strain specific names. (XLSX) [file pcbi.1006277.s001.xlsx]

## Sheet: KrakenFilterDB1_HumanEtc
File Name	Accession #	TaxonID	Species TaxonID	Organism	Strain Specific	Assembly Level
GCF_000872625.1_ViralMultiSegProj28697_genomic.fna	GCF_000872625.1	438782	438782	Abaca bunchy top virus		Complete Genome
GCF_000900375.1_ViralProj177933_genomic.fna	GCF_000900375.1	1241371	1241371	Abalone herpesvirus Victoria
GCF_000882555.1_ViralProj33141_genomic.fna	GCF_000882555.1	491893	491893	Abalone shriveling syndrome-associated virus		Complete Genome
GCF_000848265.1_ViralProj14654_genomic.fna	GCF_000848265.1	11788	11788	Abelson murine leukemia virus		Complete Genome
GCF_002270725.1_ViralProj399942_genomic.fna	GCF_002270725.1	2025595	2025595	Abisko virus		Complete Genome
GCF_000889055.1_ViralMultiSegProj48591_genomic.fna	GCF_000889055.1	665102	665102	Abutilon Brazil virus		Complete Genome
GCF_000890575.1_ViralMultiSegProj62479_genomic.fna	GCF_000890575.1	932071	932071	Abutilon mosaic Bolivia virus	strain=AbMBoV	Complete Genome
GCF_000895175.1_ViralMultiSegProj81009_genomic.fna	GCF_000895175.1	1046572	1046572	Abutilon mosaic Brazil virus		Complete Genome
GCF_000847225.1_ViralMultiSegProj14603_genomic.fna	GCF_000847225.1	10815	10815	Abutilon mosaic virus		Complete Genome
GCF_000888735.1_ViralProj60053_genomic.fna	GCF_000888735.1	212035	212035	Acanthamoeba polyphaga mimivirus		Complete Genome
GCF_000904035.1_ViralProj186430_genomic.fna	GCF_000904035.1	1269028	985782	Acanthamoeba polyphaga moumouvirus	strain=M10A	Complete Genome
GCF_000869685.1_ViralProj18527_genomic.fna	GCF_000869685.1	322019	322019	Acanthocystis turfacea Chlorella virus 1	strain=ATCV-1	Complete Genome
GCF_000905055.1_ViralProj186432_genomic.fna	GCF_000905055.1	1168547	1168547	Acartia tonsa copepod circovirus		Complete Genome
GCF_000018105.1_ASM1810v1_genomic.fna	GCF_000018105.1	329726	155978	Acaryochloris marina MBIC11017	strain=MBIC11017	Complete Genome
GCF_000196455.1_ASM19645v1_genomic.fna	GCF_000196455.1	1511	1511	Acetoanaerobium sticklandii	strain=DSM 519	Complete Genome
GCF_002005445.1_ASM200544v1_genomic.fna	GCF_002005445.1	435	435	Acetobacter aceti	strain=TMW2.1153	Complete Genome
GCF_001183745.1_ASM118374v1_genomic.fna	GCF_001183745.1	438	438	Acetobacter pasteurianus	strain=Ab3	Complete Genome
GCF_000723785.2_AP1_genomic.fna	GCF_000723785.2	1266844	438	Acetobacter pasteurianus 386B	strain=386B	Complete Genome
GCF_000010825.1_ASM1082v1_genomic.fna	GCF_000010825.1	634452	438	Acetobacter pasteurianus IFO 3283-01	strain=IFO 3283 substr. IFO 3283-01	Complete Genome
GCF_000010945.1_ASM1094v1_genomic.fna	GCF_000010945.1	634458	438	Acetobacter pasteurianus IFO 3283-01-42C	strain=IFO 3283 substr. IFO 3283-01-42C	Complete Genome
GCF_000010845.1_ASM1084v1_genomic.fna	GCF_000010845.1	634453	438	Acetobacter pasteurianus IFO 3283-03	strain=IFO 3283 substr. IFO 3283-03	Complete Genome
GCF_000010865.1_ASM1086v1_genomic.fna	GCF_000010865.1	634454	438	Acetobacter pasteurianus IFO 3283-07	strain=IFO 3283 substr. IFO 3283-07	Complete Genome
GCF_000010965.1_ASM1096v1_genomic.fna	GCF_000010965.1	634459	438	Acetobacter pasteurianus IFO 3283-12	strain=IFO 3283 substr. IFO 3283-12	Complete Genome
GCF_000010885.1_ASM1088v1_genomic.fna	GCF_000010885.1	634455	438	Acetobacter pasteurianus IFO 3283-22	strain=IFO 3283 substr. IFO 3283-22	Complete Genome
GCF_000010905.1_ASM1090v1_genomic.fna	GCF_000010905.1	634456	438	Acetobacter pasteurianus IFO 3283-26	strain=IFO 3283 substr. IFO 3283-26	Complete Genome
GCF_000010925.1_ASM1092v1_genomic.fna	GCF_000010925.1	634457	438	Acetobacter pasteurianus IFO 3283-32	strain=IFO 3283 substr. IFO 3283-32	Complete Genome
GCF_000241585.2_ASM24158v3_genomic.fna	GCF_000241585.2	1006554	438	Acetobacter pasteurianus NBRC 101655	strain=NBRC 101655	Complete Genome
GCF_001766235.1_ASM176623v1_genomic.fna	GCF_001766235.1	481146	438	Acetobacter pasteurianus subsp. ascendens	strain=LMG 1590	Complete Genome
GCF_002173775.1_ASM217377v1_genomic.fna	GCF_002173775.1	481146	438	Acetobacter pasteurianus subsp. ascendens	strain=SRCM101447	Complete Genome
GCF_001766255.1_ASM176625v1_genomic.fna	GCF_001766255.1	940260	438	Acetobacter pasteurianus subsp. paradoxus	strain=LMG 1591	Complete Genome
GCF_002173735.1_ASM217373v1_genomic.fna	GCF_002173735.1	481145	438	Acetobacter pasteurianus subsp. pasteurianus	strain=SRCM101342	Complete Genome
GCF_002006565.1_ASM200656v1_genomic.fna	GCF_002006565.1	1076596	1076596	Acetobacter persici	strain=TMW2.1084	Complete Genome
GCF_001499615.1_Acetobacter_senegalensis_108B_genomic.fna	GCF_001499615.1	446692	446692	Acetobacter senegalensis	strain=108B	Complete Genome
GCF_001628715.1_ASM162871v1_genomic.fna	GCF_001628715.1	1633874	1633874	Acetobacter sp. SLV-7	strain=SLV-7	Complete Genome
GCF_000247605.1_ASM24760v1_genomic.fna	GCF_000247605.1	931626	33952	Acetobacterium woodii DSM 1030	strain=DSM 1030	Complete Genome
GCF_000144695.1_ASM14469v1_genomic.fna	GCF_000144695.1	574087	28187	Acetohalobium arabaticum DSM 5501	strain=DSM 5501	Complete Genome
GCF_000266925.1_ASM26692v1_genomic.fna	GCF_000266925.1	891968	97477	Acetomicrobium mobile DSM 13181	strain=DSM 13181	Complete Genome
GCF_000858405.1_ViralProj15222_genomic.fna	GCF_000858405.1	185639	1513189	Acheta domestica densovirus		Complete Genome
GCF_000912155.1_ViralProj223005_genomic.fna	GCF_000912155.1	1404345	1979758	Acheta domestica mini ambidensovirus		Complete Genome
GCF_000908295.1_ViralProj198480_genomic.fna	GCF_000908295.1	1291515	1291515	Acheta domesticus volvovirus		Complete Genome
GCF_000925575.1_ViralProj265896_genomic.fna	GCF_000925575.1	1261100	1979157	Achimota virus 1		Complete Genome
GCF_000924735.1_ViralProj265895_genomic.fna	GCF_000924735.1	1261101	1979158	Achimota virus 2		Complete Genome
GCF_000967915.1_ASM96791v1_genomic.fna	GCF_000967915.1	61635	61635	Acholeplasma brassicae	strain=O502	Complete Genome
GCF_000018785.1_ASM1878v1_genomic.fna	GCF_000018785.1	441768	2148	Acholeplasma laidlawii PG-8A	strain=PG-8A	Complete Genome
GCF_000953195.1_Acholeplasma_oculi_strain_19L_genomic.fna	GCF_000953195.1	35623	35623	Acholeplasma oculi		Complete Genome
GCF_000968055.1_ASM96805v1_genomic.fna	GCF_000968055.1	1318466	38986	Acholeplasma palmae J233	strain=J233	Complete Genome
GCF_000847085.1_ViralProj14573_genomic.fna	GCF_000847085.1	10876	1977403	Acholeplasma phage MV-L1	strain=JA-1	Complete Genome
GCF_000837825.1_ViralProj14066_genomic.fna	GCF_000837825.1	46014	46014	Acholeplasma virus L2		Complete Genome
GCF_001514355.1_ASM151435v1_genomic.fna	GCF_001514355.1	32002	32002	Achromobacter denitrificans	strain=USDA-ARS-USMARC-56712	Complete Genome
GCF_001971645.1_ASM197164v1_genomic.fna	GCF_001971645.1	217204	217204	Achromobacter insolitus	strain=DSM 23807	Complete Genome
GCF_001504295.1_ViralProj307926_genomic.fna	GCF_001504295.1	1589747	1982228	Achromobacter phage 83-24		Complete Genome
GCF_000914775.1_ViralProj240045_genomic.fna	GCF_000914775.1	1416009	1416009	Achromobacter phage JWAlpha	strain=JWAlpha	Complete Genome
GCF_001551405.1_ViralProj310937_genomic.fna	GCF_001551405.1	1589748	1589748	Achromobacter phage JWF		Complete Genome
GCF_001503495.1_ViralProj307927_genomic.fna	GCF_001503495.1	1589746	1982229	Achromobacter phage JWX		Complete Genome
GCF_001504575.1_ViralProj308016_genomic.fna	GCF_001504575.1	1610509	1610509	Achromobacter phage phiAxp-1		Complete Genome
GCF_001551125.1_ViralProj310951_genomic.fna	GCF_001551125.1	1664246	1664246	Achromobacter phage phiAxp-2		Complete Genome
GCF_002211055.1_ViralProj308019_genomic.fna	GCF_002211055.1	1664247	1664247	Achromobacter phage phiAxp-3		Complete Genome
GCF_001051055.1_ASM105105v1_genomic.fna	GCF_001051055.1	85698	85698	Achromobacter xylosoxidans	strain=MN001	Complete Genome
GCF_001457475.1_NCTC10807_genomic.fna	GCF_001457475.1	85698	85698	Achromobacter xylosoxidans	strain=NCTC10807	Complete Genome
GCF_001558755.1_ASM155875v1_genomic.fna	GCF_001558755.1	85698	85698	Achromobacter xylosoxidans	strain=FDAARGOS_147	Complete Genome
GCF_000165835.1_ASM16583v1_genomic.fna	GCF_000165835.1	762376	85698	Achromobacter xylosoxidans A8	strain=A8	Complete Genome
GCF_000758265.1_ASM75826v1_genomic.fna	GCF_000758265.1	562971	85698	Achromobacter xylosoxidans C54	strain=C54	Complete Genome
GCF_000025305.1_ASM2530v1_genomic.fna	GCF_000025305.1	591001	905	Acidaminococcus fermentans DSM 20731	strain=DSM 20731	Complete Genome
GCF_000230275.1_ASM23027v1_genomic.fna	GCF_000230275.1	568816	187327	Acidaminococcus intestini RyC-MR95	strain=RyC-MR95	Complete Genome
GCF_000873825.1_ViralProj19605_genomic.fna	GCF_000873825.1	437444	437444	Acidianus bottle-shaped virus		Complete Genome
GCF_001502255.1_ViralProj307796_genomic.fna	GCF_001502255.1	1732173	1732173	Acidianus bottle-shaped virus 2	strain=ABV2	Complete Genome
GCF_001501475.1_ViralProj307795_genomic.fna	GCF_001501475.1	1732174	1732174	Acidianus bottle-shaped virus 3	strain=ABV3	Complete Genome
GCF_000842625.1_ViralProj14363_genomic.fna	GCF_000842625.1	235266	235266	Acidianus filamentous virus 1		Complete Genome
GCF_000873645.1_ViralProj20965_genomic.fna	GCF_000873645.1	300186	300186	Acidianus filamentous virus 2		Complete Genome
GCF_000878935.1_ViralProj28073_genomic.fna	GCF_000878935.1	346881	346881	Acidianus filamentous virus 3		Complete Genome
GCF_000871385.1_ViralProj28075_genomic.fna	GCF_000871385.1	346882	346882	Acidianus filamentous virus 6		Complete Genome
GCF_000872245.1_ViralProj28077_genomic.fna	GCF_000872245.1	346883	346883	Acidianus filamentous virus 7		Complete Genome
GCF_000872405.1_ViralProj28079_genomic.fna	GCF_000872405.1	346884	346884	Acidianus filamentous virus 8		Complete Genome
GCF_000879855.1_ViralProj29195_genomic.fna	GCF_000879855.1	512792	512792	Acidianus filamentous virus 9		Complete Genome
GCF_000213215.1_ASM21321v1_genomic.fna	GCF_000213215.1	933801	563177	Acidianus hospitalis W1	strain=W1	Complete Genome
GCF_000871285.1_ViralProj27799_genomic.fna	GCF_000871285.1	309181	309181	Acidianus rod-shaped virus 1		Complete Genome
GCF_001579495.1_ViralProj313551_genomic.fna	GCF_001579495.1	1732175	1732175	Acidianus rod-shaped virus 2	strain=ARV2	Complete Genome
GCF_000886935.1_ViralProj42351_genomic.fna	GCF_000886935.1	693629	693629	Acidianus spindle-shaped virus 1		Complete Genome
GCF_001579395.1_ViralProj313553_genomic.fna	GCF_001579395.1	1797140	1797140	Acidianus tailed spindle virus		Complete Genome
GCF_000865845.1_ViralProj15686_genomic.fna	GCF_000865845.1	315953	315953	Acidianus two-tailed virus		Complete Genome
GCF_001753245.1_ASM175324v1_genomic.fna	GCF_001753245.1	160660	160660	Acidihalobacter prosperus	strain=F5	Complete Genome
GCF_000144915.1_ASM14491v1_genomic.fna	GCF_000144915.1	666510	242703	Acidilobus saccharovorans 345-15	strain=345-15	Complete Genome
GCF_000023265.1_ASM2326v1_genomic.fna	GCF_000023265.1	525909	53635	Acidimicrobium ferrooxidans DSM 10331	strain=DSM 10331	Complete Genome
GCF_000016725.1_ASM1672v1_genomic.fna	GCF_000016725.1	349163	524	Acidiphilium cryptum JF-5	strain=JF-5	Complete Genome
GCF_000202835.1_ASM20283v1_genomic.fna	GCF_000202835.1	926570	62140	Acidiphilium multivorum AIU301	strain=AIU301	Complete Genome
GCF_001441165.1_ASM144116v1_genomic.fna	GCF_001441165.1	1748	1748	Acidipropionibacterium acidipropionici	strain=CGMCC 1.2230	Complete Genome
GCF_001602115.1_ASM160211v1_genomic.fna	GCF_001602115.1	1748	1748	Acidipropionibacterium acidipropionici	strain=ATCC 55737	Complete Genome
GCF_001855335.1_ASM185533v1_genomic.fna	GCF_001855335.1	1748	1748	Acidipropionibacterium acidipropionici	strain=F3E8	Complete Genome
GCF_001975205.1_ASM197520v1_genomic.fna	GCF_001975205.1	1748	1748	Acidipropionibacterium acidipropionici	strain=WSH1105	Complete Genome
GCF_000310065.1_ASM31006v1_genomic.fna	GCF_000310065.1	1171373	1748	Acidipropionibacterium acidipropionici ATCC 4875	strain=ATCC 4875	Complete Genome
GCF_000175575.2_ASM17557v2_genomic.fna	GCF_000175575.2	637389	33059	Acidithiobacillus caldus ATCC 51756	strain=ATCC 51756	Complete Genome
GCF_000221025.1_ASM22102v1_genomic.fna	GCF_000221025.1	990288	33059	Acidithiobacillus caldus SM-1	strain=SM-1	Complete Genome
GCF_000214095.2_ASM21409v3_genomic.fna	GCF_000214095.2	743299	160808	Acidithiobacillus ferrivorans SS3	strain=SS3	Complete Genome
GCF_000021485.1_ASM2148v1_genomic.fna	GCF_000021485.1	243159	920	Acidithiobacillus ferrooxidans ATCC 23270	strain=ATCC 23270	Complete Genome
GCF_000020825.1_ASM2082v1_genomic.fna	GCF_000020825.1	380394	920	Acidithiobacillus ferrooxidans ATCC 53993	strain=ATCC 53993	Complete Genome
GCF_000022565.1_ASM2256v1_genomic.fna	GCF_000022565.1	240015	33075	Acidobacterium capsulatum ATCC 51196	strain=ATCC 51196	Complete Genome
GCF_000015025.1_ASM1502v1_genomic.fna	GCF_000015025.1	351607	28049	Acidothermus cellulolyticus 11B	strain=11B; ATCC 43068	Complete Genome
GCF_000176855.2_ASM17685v2_genomic.fna	GCF_000176855.2	643561	80867	Acidovorax avenae subsp. avenae ATCC 19860	strain=ATCC 19860	Complete Genome
GCF_000015325.1_ASM1532v1_genomic.fna	GCF_000015325.1	397945	80869	Acidovorax citrulli AAC00-1	strain=AAC00-1	Complete Genome
GCF_000022305.1_ASM2230v1_genomic.fna	GCF_000022305.1	535289	721785	Acidovorax ebreus TPSY	strain=TPSY	Complete Genome
GCF_000015545.1_ASM1554v1_genomic.fna	GCF_000015545.1	232721	232721	Acidovorax sp. JS42	strain=JS42	Complete Genome
GCF_000302535.1_ASM30253v1_genomic.fna	GCF_000302535.1	358220	358220	Acidovorax sp. KKS102	strain=KKS102	Complete Genome
GCF_002157165.1_ASM215716v1_genomic.fna	GCF_002157165.1	1662456	1662456	Acidovorax sp. NA2	strain=NA2	Complete Genome
GCF_002157125.1_ASM215712v1_genomic.fna	GCF_002157125.1	1662458	1662458	Acidovorax sp. P4	strain=P4	Complete Genome
GCF_001714725.1_ASM171472v1_genomic.fna	GCF_001714725.1	1842533	1842533	Acidovorax sp. RAC01	strain=RAC01	Complete Genome
GCF_002176815.1_ASM217681v1_genomic.fna	GCF_002176815.1	1858609	1858609	Acidovorax sp. T1	strain=T1	Complete Genome
GCF_000025665.1_ASM2566v1_genomic.fna	GCF_000025665.1	439481	379547	Aciduliprofundum boonei T469	strain=T469	Complete Genome
GCF_000327505.1_ASM32750v1_genomic.fna	GCF_000327505.1	673860	673860	Aciduliprofundum sp. MAR08-339	strain=MAR08-339	Complete Genome
GCF_000695855.3_ASM69585v3_genomic.fna	GCF_000695855.3	470	470	Acinetobacter baumannii	strain=AC29	Complete Genome
GCF_000746605.1_ASM74660v1_genomic.fna	GCF_000746605.1	470	470	Acinetobacter baumannii	strain=AB031	Complete Genome
GCF_000746645.1_ASM74664v1_genomic.fna	GCF_000746645.1	470	470	Acinetobacter baumannii	strain=AB030	Complete Genome
GCF_000761175.1_ASM76117v1_genomic.fna	GCF_000761175.1	470	470	Acinetobacter baumannii	strain=AbH12O-A2	Complete Genome
GCF_000814345.1_ASM81434v1_genomic.fna	GCF_000814345.1	470	470	Acinetobacter baumannii	strain=6200	Complete Genome
GCF_000828935.1_ASM82893v1_genomic.fna	GCF_000828935.1	470	470	Acinetobacter baumannii	strain=IOMTU 433	Complete Genome
GCF_000830055.1_ASM83005v1_genomic.fna	GCF_000830055.1	470	470	Acinetobacter baumannii	strain=A1	Complete Genome
GCF_000963815.1_ASM96381v1_genomic.fna	GCF_000963815.1	470	470	Acinetobacter baumannii	strain=AB5075-UW	Complete Genome
GCF_001026965.1_ASM102696v1_genomic.fna	GCF_001026965.1	470	470	Acinetobacter baumannii	strain=XH386	Complete Genome
GCF_001077555.2_ASM107755v2_genomic.fna	GCF_001077555.2	470	470	Acinetobacter baumannii	strain=B8342	Complete Genome
GCF_001077655.1_ASM107765v1_genomic.fna	GCF_001077655.1	470	470	Acinetobacter baumannii	strain=Ab04-mff	Complete Genome
GCF_001077675.1_ASM107767v1_genomic.fna	GCF_001077675.1	470	470	Acinetobacter baumannii	strain=ATCC 17978-mff	Complete Genome
GCF_001077965.2_ASM107796v2_genomic.fna	GCF_001077965.2	470	470	Acinetobacter baumannii	strain=B8300	Complete Genome
GCF_001261895.2_R2090_genomic.fna	GCF_001261895.2	470	470	Acinetobacter baumannii		Complete Genome
GCF_001399655.1_ASM139965v1_genomic.fna	GCF_001399655.1	470	470	Acinetobacter baumannii	strain=D36	Complete Genome
GCF_001457535.1_CIP70.10_genomic.fna	GCF_001457535.1	470	470	Acinetobacter baumannii		Complete Genome
GCF_001514375.1_ASM151437v1_genomic.fna	GCF_001514375.1	470	470	Acinetobacter baumannii	strain=KBN10P02143	Complete Genome
GCF_001517645.1_R2091_genomic.fna	GCF_001517645.1	470	470	Acinetobacter baumannii		Complete Genome
GCF_001543995.1_ASM154399v1_genomic.fna	GCF_001543995.1	470	470	Acinetobacter baumannii	strain=YU-R612	Complete Genome
GCF_001573065.1_ASM157306v1_genomic.fna	GCF_001573065.1	470	470	Acinetobacter baumannii	strain=XH860	Complete Genome
GCF_001573085.1_ASM157308v1_genomic.fna	GCF_001573085.1	470	470	Acinetobacter baumannii	strain=XH859	Complete Genome
GCF_001573105.1_ASM157310v1_genomic.fna	GCF_001573105.1	470	470	Acinetobacter baumannii	strain=XH857	Complete Genome
GCF_001573125.1_ASM157312v1_genomic.fna	GCF_001573125.1	470	470	Acinetobacter baumannii	strain=XH856	Complete Genome
GCF_001578145.1_ASM157814v1_genomic.fna	GCF_001578145.1	470	470	Acinetobacter baumannii	strain=XH858	Complete Genome
GCF_001593425.2_ASM159342v2_genomic.fna	GCF_001593425.2	470	470	Acinetobacter baumannii	strain=ATCC 17978	Complete Genome
GCF_001636235.1_ASM163623v1_genomic.fna	GCF_001636235.1	470	470	Acinetobacter baumannii	strain=3207	Complete Genome
GCF_001806345.1_ASM180634v1_genomic.fna	GCF_001806345.1	470	470	Acinetobacter baumannii	strain=KAB01	Complete Genome
GCF_001806365.1_ASM180636v1_genomic.fna	GCF_001806365.1	470	470	Acinetobacter baumannii	strain=KAB02	Complete Genome
GCF_001806385.1_ASM180638v1_genomic.fna	GCF_001806385.1	470	470	Acinetobacter baumannii	strain=KAB03	Complete Genome
GCF_001806405.1_ASM180640v1_genomic.fna	GCF_001806405.1	470	470	Acinetobacter baumannii	strain=KAB04	Complete Genome
GCF_001806425.1_ASM180642v1_genomic.fna	GCF_001806425.1	470	470	Acinetobacter baumannii	strain=KAB05	Complete Genome
GCF_001806445.1_ASM180644v1_genomic.fna	GCF_001806445.1	470	470	Acinetobacter baumannii	strain=KAB06	Complete Genome
GCF_001806465.1_ASM180646v1_genomic.fna	GCF_001806465.1	470	470	Acinetobacter baumannii	strain=KAB07	Complete Genome
GCF_001806485.1_ASM180648v1_genomic.fna	GCF_001806485.1	470	470	Acinetobacter baumannii	strain=KAB08	Complete Genome
GCF_001887305.1_ASM188730v1_genomic.fna	GCF_001887305.1	470	470	Acinetobacter baumannii	strain=HRAB-85	Complete Genome
GCF_001895985.1_ASM189598v1_genomic.fna	GCF_001895985.1	470	470	Acinetobacter baumannii	strain=AF-673	Complete Genome
GCF_001896005.1_ASM189600v1_genomic.fna	GCF_001896005.1	470	470	Acinetobacter baumannii	strain=AF-401	Complete Genome
GCF_001902375.1_ASM190237v1_genomic.fna	GCF_001902375.1	470	470	Acinetobacter baumannii	strain=XDR-BJ83	Complete Genome
GCF_001908295.1_ASM190829v1_genomic.fna	GCF_001908295.1	470	470	Acinetobacter baumannii	strain=LAC4	Complete Genome
GCF_001922205.1_ASM192220v1_genomic.fna	GCF_001922205.1	470	470	Acinetobacter baumannii	strain=CMC-CR-MDR-Ab4	Complete Genome
GCF_001922225.1_ASM192222v1_genomic.fna	GCF_001922225.1	470	470	Acinetobacter baumannii		Complete Genome
GCF_001922245.1_ASM192224v1_genomic.fna	GCF_001922245.1	470	470	Acinetobacter baumannii	strain=CMC-CR-MDR-Ab66	Complete Genome
GCF_001941765.1_ASM194176v1_genomic.fna	GCF_001941765.1	470	470	Acinetobacter baumannii	strain=AB042	Complete Genome
GCF_002082625.1_ASM208262v1_genomic.fna	GCF_002082625.1	470	470	Acinetobacter baumannii	strain=JBA13	Complete Genome
GCF_002082645.1_ASM208264v1_genomic.fna	GCF_002082645.1	470	470	Acinetobacter baumannii	strain=CBA7	Complete Genome
GCF_002082685.1_ASM208268v1_genomic.fna	GCF_002082685.1	470	470	Acinetobacter baumannii	strain=15A34	Complete Genome
GCF_002082705.1_ASM208270v1_genomic.fna	GCF_002082705.1	470	470	Acinetobacter baumannii	strain=15A5	Complete Genome
GCF_002082725.1_ASM208272v1_genomic.fna	GCF_002082725.1	470	470	Acinetobacter baumannii	strain=USA2	Complete Genome
GCF_002082745.1_ASM208274v1_genomic.fna	GCF_002082745.1	470	470	Acinetobacter baumannii	strain=SSA6	Complete Genome
GCF_002082785.1_ASM208278v1_genomic.fna	GCF_002082785.1	470	470	Acinetobacter baumannii	strain=HWBA8	Complete Genome
GCF_002082805.1_ASM208280v1_genomic.fna	GCF_002082805.1	470	470	Acinetobacter baumannii	strain=WKA02	Complete Genome
GCF_002082825.1_ASM208282v1_genomic.fna	GCF_002082825.1	470	470	Acinetobacter baumannii	strain=USA15	Complete Genome
GCF_002082845.1_ASM208284v1_genomic.fna	GCF_002082845.1	470	470	Acinetobacter baumannii	strain=SAA14	Complete Genome
GCF_002082865.1_ASM208286v1_genomic.fna	GCF_002082865.1	470	470	Acinetobacter baumannii	strain=SSA12	Complete Genome
GCF_002082885.1_ASM208288v1_genomic.fna	GCF_002082885.1	470	470	Acinetobacter baumannii	strain=SSMA17	Complete Genome
GCF_002116925.1_ASM211692v1_genomic.fna	GCF_002116925.1	470	470	Acinetobacter baumannii	strain=ab736	Complete Genome
GCF_900088705.1_26872B01_genomic.fna	GCF_900088705.1	470	470	Acinetobacter baumannii	strain=BAL062	Complete Genome
GCF_000188215.1_ASM18821v1_genomic.fna	GCF_000188215.1	696749	470	Acinetobacter baumannii 1656-2	strain=1656-2	Complete Genome
GCF_000021245.1_ASM2124v1_genomic.fna	GCF_000021245.1	480119	470	Acinetobacter baumannii AB0057	strain=AB0057	Complete Genome
GCF_000021145.1_ASM2114v1_genomic.fna	GCF_000021145.1	557600	470	Acinetobacter baumannii AB307-0294	strain=AB307-0294	Complete Genome
GCF_000018445.1_ASM1844v1_genomic.fna	GCF_000018445.1	405416	470	Acinetobacter baumannii ACICU	strain=ACICU	Complete Genome
GCF_000069245.1_ASM6924v1_genomic.fna	GCF_000069245.1	509173	470	Acinetobacter baumannii AYE	strain=AYE	Complete Genome
GCF_000419385.1_ASM41938v1_genomic.fna	GCF_000419385.1	1096995	470	Acinetobacter baumannii BJAB07104	strain=BJAB07104	Complete Genome
GCF_000419405.1_ASM41940v1_genomic.fna	GCF_000419405.1	1096996	470	Acinetobacter baumannii BJAB0715	strain=BJAB0715	Complete Genome
GCF_000419425.1_ASM41942v1_genomic.fna	GCF_000419425.1	1096997	470	Acinetobacter baumannii BJAB0868	strain=BJAB0868	Complete Genome
GCF_000186665.3_ASM18666v4_genomic.fna	GCF_000186665.3	945556	470	Acinetobacter baumannii D1279779	strain=D1279779	Complete Genome
GCF_000498375.2_ASM49837v2_genomic.fna	GCF_000498375.2	1370126	470	Acinetobacter baumannii DU202	strain=DU202	Complete Genome
GCF_000786735.1_ASM78673v1_genomic.fna	GCF_000786735.1	1455315	470	Acinetobacter baumannii LAC-4	strain=LAC-4	Complete Genome
GCF_000187205.2_ASM18720v4_genomic.fna	GCF_000187205.2	889738	470	Acinetobacter baumannii MDR-TJ	strain=MDR-TJ	Complete Genome
GCF_000226275.1_ASM22627v1_genomic.fna	GCF_000226275.1	497978	470	Acinetobacter baumannii MDR-ZJ06	strain=MDR-ZJ06	Complete Genome
GCF_000828795.1_ASM82879v1_genomic.fna	GCF_000828795.1	1401639	470	Acinetobacter baumannii NCGM 237	strain=NCGM 237	Complete Genome
GCF_000302575.1_ASM30257v1_genomic.fna	GCF_000302575.1	1100841	470	Acinetobacter baumannii TYTH-1	strain=TYTH-1	Complete Genome
GCF_000505685.1_ASM50568v2_genomic.fna	GCF_000505685.1	1400867	470	Acinetobacter baumannii ZW85-1	strain=ZW85-1	Complete Genome
GCF_002055515.1_ASM205551v1_genomic.fna	GCF_002055515.1	471	471	Acinetobacter calcoaceticus	strain=CA16	Complete Genome
GCF_900093475.1_36734_D01_2_genomic.fna	GCF_900093475.1	471	471	Acinetobacter calcoaceticus	strain=NCTC7364	Complete Genome
GCF_001307195.1_ASM130719v1_genomic.fna	GCF_001307195.1	1324350	1324350	Acinetobacter equi	strain=114	Complete Genome
GCF_001932555.1_ASM193255v1_genomic.fna	GCF_001932555.1	29430	29430	Acinetobacter haemolyticus	strain=TJS01	Complete Genome
GCF_001484935.1_ASM148493v1_genomic.fna	GCF_001484935.1	1242245	40214	Acinetobacter johnsonii XBB1	strain=XBB1	Complete Genome
GCF_001941805.1_ASM194180v1_genomic.fna	GCF_001941805.1	40215	40215	Acinetobacter junii	strain=65	Complete Genome
GCF_002076935.1_ASM207693v1_genomic.fna	GCF_002076935.1	1785128	1785128	Acinetobacter lactucae	strain=OTEC-02	Complete Genome
GCF_001704115.1_ASM170411v1_genomic.fna	GCF_001704115.1	1789224	1789224	Acinetobacter larvae	strain=BRTC-1	Complete Genome
GCF_000814165.3_ASM81416v3_genomic.fna	GCF_000814165.3	106654	106654	Acinetobacter nosocomialis	strain=6411	Complete Genome
GCF_002082665.1_ASM208266v1_genomic.fna	GCF_002082665.1	106654	106654	Acinetobacter nosocomialis	strain=SSA3	Complete Genome
GCF_000196795.1_ASM19679v1_genomic.fna	GCF_000196795.1	436717	1148157	Acinetobacter oleivorans DR1	strain=DR1	Complete Genome
GCF_000908675.1_ViralProj206500_genomic.fna	GCF_000908675.1	1273713	1985718	Acinetobacter phage AB3		Complete Genome
GCF_000907515.1_ViralProj206470_genomic.fna	GCF_000907515.1	1235824	1985714	Acinetobacter phage Abp1		Complete Genome
GCF_000890275.1_ViralProj60115_genomic.fna	GCF_000890275.1	762660	762660	Acinetobacter phage Ac42	strain=Ac42	Complete Genome
GCF_000887755.1_ViralProj60117_genomic.fna	GCF_000887755.1	760732	760732	Acinetobacter phage Acj61		Complete Genome
GCF_000888755.1_ViralProj60121_genomic.fna	GCF_000888755.1	760939	760939	Acinetobacter phage Acj9		Complete Genome
GCF_000850225.1_ViralProj14710_genomic.fna	GCF_000850225.1	154784	154784	Acinetobacter phage AP205		Complete Genome
GCF_000894675.1_ViralProj167576_genomic.fna	GCF_000894675.1	1187128	1915209	Acinetobacter phage AP22		Complete Genome
GCF_000902615.1_ViralProj181989_genomic.fna	GCF_000902615.1	1221835	1221835	Acinetobacter phage Bphi-B1251		Complete Genome
GCF_001501195.1_ViralProj307739_genomic.fna	GCF_001501195.1	1647373	1985712	Acinetobacter phage Fri1		Complete Genome
GCF_000915715.1_ViralProj240027_genomic.fna	GCF_000915715.1	1458669	1458669	Acinetobacter phage IME_AB3		Complete Genome
GCF_001745775.1_ViralProj344131_genomic.fna	GCF_001745775.1	1792222	1792222	Acinetobacter phage LZ35		Complete Genome
GCF_000916495.1_ViralProj240050_genomic.fna	GCF_000916495.1	1406779	1406779	Acinetobacter phage Petty		Complete Genome
GCF_001470235.1_ViralProj306350_genomic.fna	GCF_001470235.1	691318	1985715	Acinetobacter phage phiAB1		Complete Genome
GCF_001745115.1_ViralProj344132_genomic.fna	GCF_001745115.1	1698439	1698439	Acinetobacter phage phiAB6		Complete Genome
GCF_001503595.1_ViralProj307947_genomic.fna	GCF_001503595.1	1229760	1229760	Acinetobacter phage phiAC-1		Complete Genome
GCF_000917335.1_ViralProj240048_genomic.fna	GCF_000917335.1	1406780	1406780	Acinetobacter phage Presley		Complete Genome
GCF_000925015.1_ViralProj266778_genomic.fna	GCF_000925015.1	1481186	1481186	Acinetobacter phage vB_AbaM_Acibel004		Complete Genome
GCF_001500795.1_ViralProj307790_genomic.fna	GCF_001500795.1	1735582	1985713	Acinetobacter phage vB_AbaM_IME200		Complete Genome
GCF_001755565.1_ViralProj344607_genomic.fna	GCF_001755565.1	1605379	1605379	Acinetobacter phage vB_AbaM_phiAbaA1		Complete Genome
GCF_000927515.1_ViralProj266777_genomic.fna	GCF_000927515.1	1481187	1481187	Acinetobacter phage vB_AbaP_Acibel007		Complete Genome
GCF_001470095.1_ViralProj306286_genomic.fna	GCF_001470095.1	1701807	1985716	Acinetobacter phage vB_AbaP_PD-6A3		Complete Genome
GCF_001470635.1_ViralProj306285_genomic.fna	GCF_001470635.1	1701808	1985717	Acinetobacter phage vB_AbaP_PD-AB9		Complete Genome
GCF_001743895.1_ViralProj344160_genomic.fna	GCF_001743895.1	1852629	1852629	Acinetobacter phage vB_AbaS_TRS1		Complete Genome
GCF_001501295.1_ViralProj307759_genomic.fna	GCF_001501295.1	1628720	1628720	Acinetobacter phage YMC11
GCF_001042155.1_ViralProj287976_genomic.fna	GCF_001042155.1	1560342	1560342	Acinetobacter phage YMC13
GCF_000926095.1_ViralProj260480_genomic.fna	GCF_000926095.1	1505225	1915206	Acinetobacter phage YMC-13-01-C62		Complete Genome
GCF_000898295.2_ViralProj169230_genomic.fna	GCF_000898295.2	1049283	1049283	Acinetobacter phage ZZ1		Complete Genome
GCF_001577285.1_ASM157728v1_genomic.fna	GCF_001577285.1	48296	48296	Acinetobacter pittii	strain=AP_882	Complete Genome
GCF_001617545.1_ASM161754v1_genomic.fna	GCF_001617545.1	48296	48296	Acinetobacter pittii	strain=IEC338SC	Complete Genome
GCF_002012285.1_ASM201228v1_genomic.fna	GCF_002012285.1	48296	48296	Acinetobacter pittii	strain=YMC2010
GCF_002158945.1_ASM215894v1_genomic.fna	GCF_002158945.1	48296	48296	Acinetobacter pittii	strain=HUMV-6483	Complete Genome
GCF_000191145.1_ASM19114v1_genomic.fna	GCF_000191145.1	871585	48296	Acinetobacter pittii PHEA-2	strain=PHEA-2	Complete Genome
GCF_001971565.1_ASM197156v1_genomic.fna	GCF_001971565.1	108981	108981	Acinetobacter schindleri	strain=ACE	Complete Genome
GCF_001953195.1_ASM195319v1_genomic.fna	GCF_001953195.1	487316	487316	Acinetobacter soli	strain=GFJ2	Complete Genome
GCF_000046845.1_ASM4684v1_genomic.fna	GCF_000046845.1	62977	62977	Acinetobacter sp. ADP1	strain=ADP1	Complete Genome
GCF_001647675.1_ASM164767v1_genomic.fna	GCF_001647675.1	1608473	1608473	Acinetobacter sp. NCu2D-2	strain=NCu2D-2	Complete Genome
GCF_001612555.1_ASM161255v1_genomic.fna	GCF_001612555.1	1407071	1407071	Acinetobacter sp. TGL-Y2	strain=TGL-Y2	Complete Genome
GCF_001278715.1_ASM127871v1_genomic.fna	GCF_001278715.1	1646498	1646498	Acinetobacter sp. TTH0-4	strain=TTH0-4	Complete Genome
GCF_000891695.1_ViralProj64541_genomic.fna	GCF_000891695.1	279006	279006	Acinetobacter virus 133	strain=Acj133	Complete Genome
GCF_000863345.1_ViralProj15382_genomic.fna	GCF_000863345.1	101764	101764	Aconitum latent virus		Complete Genome
GCF_002270905.1_ViralProj399949_genomic.fna	GCF_002270905.1	2024724	2024724	Actinidia virus 1		Complete Genome
GCF_000896495.1_ViralProj77137_genomic.fna	GCF_000896495.1	1112770	1112770	Actinidia virus B		Complete Genome
GCF_001465485.1_ViralProj305432_genomic.fna	GCF_001465485.1	1331744	1331744	Actinidia virus X	strain=RV-3124	Complete Genome
GCF_001747425.1_ASM174742v1_genomic.fna	GCF_001747425.1	340345	340345	Actinoalloteichus hymeniacidonis	strain=HPA177(T) (=DSM 45092(T))	Complete Genome
GCF_001941625.1_ASM194162v1_genomic.fna	GCF_001941625.1	1612552	1612552	Actinoalloteichus sp. ADI127-7	strain=ADI127-7	Complete Genome
GCF_001941645.1_ASM194164v1_genomic.fna	GCF_001941645.1	1612551	1612551	Actinoalloteichus sp. GBA129-24	strain=GBA129-24	Complete Genome
GCF_000801145.1_ASM80114v1_genomic.fna	GCF_000801145.1	202947	718	Actinobacillus equuli subsp. equuli	strain=19392	Complete Genome
GCF_000016685.1_ASM1668v1_genomic.fna	GCF_000016685.1	434271	715	Actinobacillus pleuropneumoniae serovar 3 str. JL03	strain=JL03	Complete Genome
GCF_000015885.1_ASM1588v1_genomic.fna	GCF_000015885.1	416269	715	Actinobacillus pleuropneumoniae serovar 5b str. L20	strain=L20	Complete Genome
GCF_000020405.1_ASM2040v1_genomic.fna	GCF_000020405.1	537457	715	Actinobacillus pleuropneumoniae serovar 7 str. AP76	strain=AP76	Complete Genome
GCF_001460855.1_MIDG2331_genomic.fna	GCF_001460855.1	754345	715	Actinobacillus pleuropneumoniae serovar 8		Complete Genome
GCF_000017245.1_ASM1724v1_genomic.fna	GCF_000017245.1	339671	67854	Actinobacillus succinogenes 130Z	strain=130Z	Complete Genome
GCF_000739435.1_ASM73943v1_genomic.fna	GCF_000739435.1	743972	716	Actinobacillus suis ATCC 33415	strain=ATCC 33415	Complete Genome
GCF_001023575.1_ASM102357v1_genomic.fna	GCF_001023575.1	1650658	1650658	Actinobacteria bacterium IMCC26256	strain=IMCC26256	Complete Genome
GCF_002076915.1_ASM207691v1_genomic.fna	GCF_002076915.1	1960083	1960083	Actinomyces gaoshouyii	strain=pika_114	Complete Genome
GCF_001262055.1_ASM126205v1_genomic.fna	GCF_001262055.1	52773	52773	Actinomyces meyeri	strain=W712	Complete Genome
GCF_001553935.1_ASM155393v1_genomic.fna	GCF_001553935.1	544580	544580	Actinomyces oris	strain=T14V	Complete Genome
GCF_900120245.1_PRJEB17949_genomic.fna	GCF_900120245.1	1852377	1852377	Actinomyces pacaensis	strain=Marseille-P2985	Complete Genome
GCF_001553565.1_ASM155356v1_genomic.fna	GCF_001553565.1	111015	111015	Actinomyces radicidentis	strain=CCUG 36733	Complete Genome
GCF_001278845.1_ASM127884v1_genomic.fna	GCF_001278845.1	712122	712122	Actinomyces sp. oral taxon 414	strain=F0588	Complete Genome
GCF_001856685.1_ASM185668v1_genomic.fna	GCF_001856685.1	1912795	1912795	Actinomyces sp. VUL4_3	strain=VUL4_3	Complete Genome
GCF_000874085.1_ViralProj20057_genomic.fna	GCF_000874085.1	338473	338473	Actinomyces virus Av1		Complete Genome
GCF_000494755.1_ASM49475v1_genomic.fna	GCF_000494755.1	1246995	196914	Actinoplanes friuliensis DSM 7358	strain=DSM 7358	Complete Genome
GCF_000284295.1_ASM28429v1_genomic.fna	GCF_000284295.1	512565	1866	Actinoplanes missouriensis 431	strain=431	Complete Genome
GCF_000842685.1_ViralProj14378_genomic.fna	GCF_000842685.1	279303	279303	Actinoplanes phage phiAsp2		Complete Genome
GCF_000389965.1_ASM38996v1_genomic.fna	GCF_000389965.1	649831	649831	Actinoplanes sp. N902-109	strain=N902-109	Complete Genome
GCF_000237145.1_ASM23714v1_genomic.fna	GCF_000237145.1	134676	134676	Actinoplanes sp. SE50
GCF_900119315.1_ACP50_genomic.fna	GCF_900119315.1	134676	134676	Actinoplanes sp. SE50
GCF_000023245.1_ASM2324v1_genomic.fna	GCF_000023245.1	446462	40567	Actinosynnema mirum DSM 43827	strain=DSM 43827	Complete Genome
GCF_000724605.1_ASM72460v1_genomic.fna	GCF_000724605.1	59505	59505	Actinotignum schaalii	strain=CCUG 27420	Complete Genome
GCF_000856345.1_ViralProj14983_genomic.fna	GCF_000856345.1	92444	92444	Acute bee paralysis virus		Complete Genome
GCF_000886815.1_ViralProj40357_genomic.fna	GCF_000886815.1	340187	340187	Acyrthosiphon pisum virus		Complete Genome
GCF_001433545.1_ViralProj301068_genomic.fna	GCF_001433545.1	31612	1972589	Adelaide River virus		Complete Genome
GCF_000930155.1_ViralProj272395_genomic.fna	GCF_000930155.1	1590650	1891750	Adelie penguin polyomavirus		Complete Genome
GCF_001957335.1_ViralProj360992_genomic.fna	GCF_001957335.1	1930920	1930920	Adelphocoris suturalis virus		Complete Genome
GCF_000863065.1_ViralProj15323_genomic.fna	GCF_000863065.1	85106	1511891	Adeno-associated virus - 1		Complete Genome
GCF_000838645.1_ViralProj14060_genomic.fna	GCF_000838645.1	10804	1511891	Adeno-associated virus - 2		Complete Genome
GCF_000841585.1_ViralProj14319_genomic.fna	GCF_000841585.1	46350	1511891	Adeno-associated virus - 3	strain=3H	Complete Genome
GCF_000836885.1_ViralProj14030_genomic.fna	GCF_000836885.1	57579	1511891	Adeno-associated virus - 4		Complete Genome
GCF_000846385.1_ViralProj14426_genomic.fna	GCF_000846385.1	82300	1511892	Adeno-associated virus - 5		Complete Genome
GCF_000845645.1_ViralProj14454_genomic.fna	GCF_000845645.1	202812	1511891	Adeno-associated virus - 7		Complete Genome
GCF_000846525.1_ViralProj14455_genomic.fna	GCF_000846525.1	202813	1511891	Adeno-associated virus - 8		Complete Genome
GCF_000478885.1_ASM47888v1_genomic.fna	GCF_000478885.1	1384484	446660	Adlercreutzia equolifaciens DSM 19450	strain=DSM 19450	Complete Genome
GCF_000427135.1_AHEV_1_genomic.fna	GCF_000427135.1	1293540	1993630	Adoxophyes honmai entomopoxvirus 'L'		Complete Genome
GCF_000843745.1_ViralProj14408_genomic.fna	GCF_000843745.1	224399	224399	Adoxophyes honmai nucleopolyhedrovirus	strain=ADN001	Complete Genome
GCF_000841485.1_ViralProj14298_genomic.fna	GCF_000841485.1	170617	170617	Adoxophyes orana granulovirus		Complete Genome
GCF_000883235.1_ViralProj32387_genomic.fna	GCF_000883235.1	542343	542343	Adoxophyes orana nucleopolyhedrovirus		Complete Genome
GCF_000864245.1_ViralMultiSegProj16144_genomic.fna	GCF_000864245.1	335103	1348384	Adult diarrheal rotavirus strain J19	strain=J19	Complete Genome
GCF_000219915.2_ASM21991v3_genomic.fna	GCF_000219915.2	1036672	310575	Advenella kashmirensis WT001	strain=WT001	Complete Genome
GCF_000521505.1_ASM52150v1_genomic.fna	GCF_000521505.1	1247726	302406	Advenella mimigardefordensis DPN7	strain=DPN7	Complete Genome
GCF_000882875.1_ViralProj37821_genomic.fna	GCF_000882875.1	1513196	1513193	Aedes aegypti densovirus 2	strain=0814616	Complete Genome
GCF_002210815.1_ViralProj392153_genomic.fna	GCF_002210815.1	2010265	2010265	Aedes alboannulatus toti-like virus 1	strain=mosWSCP114121	Complete Genome
GCF_000847125.1_ViralProj14581_genomic.fna	GCF_000847125.1	1513199	1513198	Aedes albopictus densovirus 2		Complete Genome
GCF_002210595.1_ViralProj392151_genomic.fna	GCF_002210595.1	2010268	2010268	Aedes camptorhynchus negev-like virus	strain=mos191CP47896	Complete Genome
GCF_002288815.1_ViralMultiSegProj394309_genomic.fna	GCF_002288815.1	2010269	2010269	Aedes camptorhynchus reo-like virus	strain=mos182CP78499	Complete Genome
GCF_002211015.1_ViralProj392152_genomic.fna	GCF_002211015.1	2010266	2010266	Aedes camptorhynchus toti-like virus 1	strain=mos172CP87493	Complete Genome
GCF_000885715.1_ViralProj39601_genomic.fna	GCF_000885715.1	390845	390845	Aedes flavivirus	strain=Narita-21	Complete Genome
GCF_000866085.1_ViralMultiSegProj16243_genomic.fna	GCF_000866085.1	341721	341721	Aedes pseudoscutellaris reovirus		Complete Genome
GCF_000265385.1_ASM26538v1_genomic.fna	GCF_000265385.1	746697	101385	Aequorivita sublithincola DSM 14238	strain=DSM 14238	Complete Genome
GCF_001543105.1_ASM154310v1_genomic.fna	GCF_001543105.1	87541	87541	Aerococcus christensenii	strain=CCUG28831	Complete Genome
GCF_001543145.1_ASM154314v1_genomic.fna	GCF_001543145.1	119206	119206	Aerococcus sanguinicola	strain=CCUG43001	Complete Genome
GCF_001543175.1_ASM154317v1_genomic.fna	GCF_001543175.1	1376	1376	Aerococcus urinae	strain=CCUG36881	Complete Genome
GCF_000193205.1_ASM19320v1_genomic.fna	GCF_000193205.1	866775	1376	Aerococcus urinae ACS-120-V-Col10a	strain=ACS-120-V-Col10a	Complete Genome
GCF_001518795.1_ASM151879v1_genomic.fna	GCF_001518795.1	51665	51665	Aerococcus urinaeequi	strain=USDA-ARS-USMARC-56713	Complete Genome
GCF_001543205.1_ASM154320v1_genomic.fna	GCF_001543205.1	51665	51665	Aerococcus urinaeequi	strain=CCUG28094	Complete Genome
GCF_001543245.1_ASM154324v1_genomic.fna	GCF_001543245.1	128944	128944	Aerococcus urinaehominis	strain=CCUG42038B	Complete Genome
GCF_001543285.1_ASM154328v1_genomic.fna	GCF_001543285.1	1377	1377	Aerococcus viridans	strain=CCUG4311	Complete Genome
GCF_001509405.1_ASM150940v1_genomic.fna	GCF_001509405.1	2041	2041	Aeromicrobium erythreum	strain=AR18	Complete Genome
GCF_001895965.1_ASM189596v1_genomic.fna	GCF_001895965.1	558964	558964	Aeromonas aquatica	strain=MX16A	Complete Genome
GCF_000940915.1_ASM94091v1_genomic.fna	GCF_000940915.1	644	644	Aeromonas hydrophila	strain=AL06-06	Complete Genome
GCF_000963645.1_ASM96364v1_genomic.fna	GCF_000963645.1	644	644	Aeromonas hydrophila	strain=AH10	Complete Genome
GCF_001455365.1_ASM145536v1_genomic.fna	GCF_001455365.1	644	644	Aeromonas hydrophila	strain=JBN2301	Complete Genome
GCF_001518775.1_ASM151877v1_genomic.fna	GCF_001518775.1	644	644	Aeromonas hydrophila	strain=D4	Complete Genome
GCF_001683535.1_ASM168353v1_genomic.fna	GCF_001683535.1	644	644	Aeromonas hydrophila	strain=GYK1	Complete Genome
GCF_001687125.1_ASM168712v1_genomic.fna	GCF_001687125.1	644	644	Aeromonas hydrophila	strain=AHNIH1	Complete Genome
GCF_000512185.1_ASM51218v1_genomic.fna	GCF_000512185.1	1354302	644	Aeromonas hydrophila 4AK4	strain=4AK4	Complete Genome
GCF_000633175.1_ASM63317v1_genomic.fna	GCF_000633175.1	1418110	644	Aeromonas hydrophila AL09-71	strain=AL09-71	Complete Genome
GCF_000819505.1_ASM81950v1_genomic.fna	GCF_000819505.1	1419584	644	Aeromonas hydrophila J-1	strain=J-1	Complete Genome
GCF_000401555.1_ASM40155v1_genomic.fna	GCF_000401555.1	1288394	644	Aeromonas hydrophila ML09-119	strain=ML09-119	Complete Genome
GCF_001019645.1_ASM101964v1_genomic.fna	GCF_001019645.1	1416915	644	Aeromonas hydrophila NJ-35	strain=NJ-35	Complete Genome
GCF_000635955.1_ASM63595v1_genomic.fna	GCF_000635955.1	1418107	644	Aeromonas hydrophila pc104A	strain=pc104A	Complete Genome
GCF_000014805.1_ASM1480v1_genomic.fna	GCF_000014805.1	380703	644	Aeromonas hydrophila subsp. hydrophila ATCC 7966	strain=ATCC 7966	Complete Genome
GCF_000612075.2_ASM61207v2_genomic.fna	GCF_000612075.2	1448139	644	Aeromonas hydrophila YL17	strain=YL17	Complete Genome
GCF_000287215.2_ASM28721v3_genomic.fna	GCF_000287215.2	1208104	651	Aeromonas media WS	strain=WS	Complete Genome
GCF_000907075.1_ViralProj195532_genomic.fna	GCF_000907075.1	1198014	1921530	Aeromonas phage Aes012		Complete Genome
GCF_000901975.1_ViralProj181986_genomic.fna	GCF_000901975.1	1198013	1921531	Aeromonas phage Aes508		Complete Genome
GCF_000903495.1_ViralProj181987_genomic.fna	GCF_000903495.1	1204516	1204516	Aeromonas phage CC2		Complete Genome
GCF_000929475.1_ViralProj266776_genomic.fna	GCF_000929475.1	1505227	1505227	Aeromonas phage pAh6-C		Complete Genome
GCF_000890235.1_ViralProj59727_genomic.fna	GCF_000890235.1	879628	1921528	Aeromonas phage phiAS4		Complete Genome
GCF_000887715.1_ViralProj59729_genomic.fna	GCF_000887715.1	879630	879630	Aeromonas phage phiAS5		Complete Genome
GCF_000902435.1_ViralProj181221_genomic.fna	GCF_000902435.1	1141132	1141132	Aeromonas phage phiAS7		Complete Genome
GCF_000920195.1_ViralProj240747_genomic.fna	GCF_000920195.1	926067	926067	Aeromonas phage PX29		Complete Genome
GCF_000901775.1_ViralProj181214_genomic.fna	GCF_000901775.1	1127514	1127514	Aeromonas phage vB_AsaM-56		Complete Genome
GCF_000196395.1_ASM19639v1_genomic.fna	GCF_000196395.1	382245	645	Aeromonas salmonicida subsp. salmonicida A449	strain=A449	Complete Genome
GCF_001447335.1_ASM144733v1_genomic.fna	GCF_001447335.1	652	652	Aeromonas schubertii	strain=WL1483	Complete Genome
GCF_002180335.1_ASM218033v1_genomic.fna	GCF_002180335.1	697046	697046	Aeromonas sp. O23A	strain=O23A	Complete Genome
GCF_001593245.1_ASM159324v1_genomic.fna	GCF_001593245.1	654	654	Aeromonas veronii	strain=TH0426	Complete Genome
GCF_001634325.1_ASM163432v1_genomic.fna	GCF_001634325.1	654	654	Aeromonas veronii	strain=AVNIH1	Complete Genome
GCF_000204115.1_ASM20411v1_genomic.fna	GCF_000204115.1	998088	654	Aeromonas veronii B565	strain=B565	Complete Genome
GCF_000868205.1_ViralProj17105_genomic.fna	GCF_000868205.1	233894	233894	Aeromonas virus 25		Complete Genome
GCF_000862645.1_ViralProj15416_genomic.fna	GCF_000862645.1	321023	321023	Aeromonas virus 31		Complete Genome
GCF_000842425.1_ViralProj14321_genomic.fna	GCF_000842425.1	115987	115987	Aeromonas virus 44RR2		Complete Genome
GCF_000893255.1_ViralProj64543_genomic.fna	GCF_000893255.1	260149	260149	Aeromonas virus 65		Complete Genome
GCF_000843245.1_ViralProj14312_genomic.fna	GCF_000843245.1	227470	227470	Aeromonas virus Aeh1		Complete Genome
GCF_000873905.1_ViralProj19769_genomic.fna	GCF_000873905.1	393598	393598	Aeromonas virus phiO18P		Complete Genome
GCF_001440875.1_ViralProj301255_genomic.fna	GCF_001440875.1	1032474	1032474	Aeropyrum pernix ovoid virus 1		Complete Genome
GCF_001441135.1_ViralProj301256_genomic.fna	GCF_001441135.1	1032473	1032473	Aeropyrum pernix spindle-shaped virus 1		Complete Genome
GCF_000931355.1_ViralProj275611_genomic.fna	GCF_000931355.1	1609159	1609159	African bat icavirus A		Complete Genome
GCF_000857205.1_ViralMultiSegProj15175_genomic.fna	GCF_000857205.1	10817	10817	African cassava mosaic virus		Complete Genome
GCF_002029515.1_ViralProj379130_genomic.fna	GCF_002029515.1	1963256	1963256	African eggplant yellowing virus		Complete Genome
GCF_000911115.1_ViralProj222309_genomic.fna	GCF_000911115.1	1399914	1891766	African elephant polyomavirus 1
GCF_000860565.1_ViralProj15320_genomic.fna	GCF_000860565.1	12480	12480	African green monkey polyomavirus		Complete Genome
GCF_000874485.1_ViralProj30095_genomic.fna	GCF_000874485.1	338079	338079	African green monkey simian foamy virus	strain=LK-3	Complete Genome
GCF_000856125.1_ViralMultiSegProj14937_genomic.fna	GCF_000856125.1	40050	40050	African horse sickness virus		Complete Genome
GCF_000882155.1_ViralProj36557_genomic.fna	GCF_000882155.1	185218	185218	African oil palm ringspot virus		Complete Genome
GCF_000858485.1_ViralProj15242_genomic.fna	GCF_000858485.1	10497	10497	African swine fever virus	strain=BA71V	Complete Genome
GCF_002157225.1_ASM215722v1_genomic.fna	GCF_002157225.1	1737490	1737490	Agarilytica rhodophyticola	strain=017	Complete Genome
GCF_001420915.1_ASM142091v1_genomic.fna	GCF_001420915.1	680279	680279	Agarivorans gilvus	strain=WH0801	Complete Genome
GCF_002184195.1_ViralProj388402_genomic.fna	GCF_002184195.1	387423	387423	Agave tequilana leaf virus		Complete Genome
GCF_000921555.1_ViralProj259293_genomic.fna	GCF_000921555.1	944995	944995	Ageratum conyzoides associated symptomless alphasatellite		Complete Genome
GCF_001429995.1_ViralProj300248_genomic.fna	GCF_001429995.1	1705092	1705092	Ageratum conyzoides symptomless alphasatellite		Complete Genome
GCF_000902015.1_ViralProj181994_genomic.fna	GCF_000902015.1	1260769	1260769	Ageratum enation alphasatellite		Complete Genome
GCF_000859025.1_ViralProj15192_genomic.fna	GCF_000859025.1	188333	188333	Ageratum enation virus		Complete Genome
GCF_000912595.1_ViralMultiSegProj216153_genomic.fna	GCF_000912595.1	1386090	1386090	Ageratum latent virus		Complete Genome
GCF_000904615.1_ViralProj195929_genomic.fna	GCF_000904615.1	1175505	1175505	Ageratum leaf curl betasatellite		Complete Genome
GCF_000888815.1_ViralProj60749_genomic.fna	GCF_000888815.1	912035	912035	Ageratum leaf curl Buea betasatellite		Complete Genome
GCF_000887815.1_ViralProj60733_genomic.fna	GCF_000887815.1	743035	743035	Ageratum leaf curl Cameroon alphasatellite		Complete Genome
GCF_000884735.1_ViralProj36669_genomic.fna	GCF_000884735.1	635076	635076	Ageratum leaf curl Cameroon betasatellite		Complete Genome
GCF_000888715.1_ViralProj60043_genomic.fna	GCF_000888715.1	912033	912033	Ageratum leaf curl Cameroon virus		Complete Genome
GCF_000844985.1_ViralProj14492_genomic.fna	GCF_000844985.1	298650	333293	Ageratum leaf curl virus - G52		Complete Genome
GCF_000846445.1_ViralProj14439_genomic.fna	GCF_000846445.1	169687	169687	Ageratum yellow leaf curl betasatellite		Complete Genome
GCF_001974535.1_ViralProj369104_genomic.fna	GCF_001974535.1	187850	187850	Ageratum yellow vein alphasatellite		Complete Genome
GCF_000844745.1_ViralProj14444_genomic.fna	GCF_000844745.1	185750	185750	Ageratum yellow vein betasatellite		Complete Genome
GCF_000915415.1_ViralProj237561_genomic.fna	GCF_000915415.1	1454227	1454227	Ageratum yellow vein China alphasatellite		Complete Genome
GCF_000866525.1_ViralProj15515_genomic.fna	GCF_000866525.1	329288	329288	Ageratum yellow vein China betasatellite		Complete Genome
GCF_000845825.1_ViralProj14490_genomic.fna	GCF_000845825.1	202567	202567	Ageratum yellow vein China virus		Complete Genome
GCF_000907355.1_ViralProj202889_genomic.fna	GCF_000907355.1	1329380	1329380	Ageratum Yellow vein China virus - OX1	strain=OX1	Complete Genome
GCF_000880075.1_ViralProj30057_genomic.fna	GCF_000880075.1	437063	437063	Ageratum yellow vein Hualian virus	strain=Taiwan:Hsinchu:tom:2003	Complete Genome
GCF_001962155.1_ViralProj361920_genomic.fna	GCF_001962155.1	1468596	1468596	Ageratum yellow vein Pakistan alphasatellite		Complete Genome
GCF_000842005.1_ViralProj14232_genomic.fna	GCF_000842005.1	915293	915293	Ageratum yellow vein Singapore alphasatellite		Complete Genome
GCF_000838085.1_ViralProj14120_genomic.fna	GCF_000838085.1	222079	222079	Ageratum yellow vein Sri Lanka virus		Complete Genome
GCF_000840465.1_ViralProj14249_genomic.fna	GCF_000840465.1	222441	222441	Ageratum yellow vein Taiwan virus		Complete Genome
GCF_000857345.1_ViralProj15203_genomic.fna	GCF_000857345.1	44560	44560	Ageratum yellow vein virus		Complete Genome
GCF_001008515.1_ViralProj284016_genomic.fna	GCF_001008515.1	44560	44560	Ageratum yellow vein virus	strain=Guam 12-02	Complete Genome
GCF_001594245.1_ASM159424v1_genomic.fna	GCF_001594245.1	714	714	Aggregatibacter actinomycetemcomitans	strain=VT1169	Complete Genome
GCF_001594265.1_ASM159426v1_genomic.fna	GCF_001594265.1	714	714	Aggregatibacter actinomycetemcomitans	strain=624	Complete Genome
GCF_001690155.1_ASM169015v1_genomic.fna	GCF_001690155.1	714	714	Aggregatibacter actinomycetemcomitans	strain=IDH781	Complete Genome
GCF_000604045.1_ASM60404v1_genomic.fna	GCF_000604045.1	272556	714	Aggregatibacter actinomycetemcomitans HK1651	strain=HK1651	Complete Genome
GCF_001262035.1_ASM126203v1_genomic.fna	GCF_001262035.1	732	732	Aggregatibacter aphrophilus	strain=W10433	Complete Genome
GCF_000022985.1_ASM2298v1_genomic.fna	GCF_000022985.1	634176	732	Aggregatibacter aphrophilus NJ8700	strain=NJ8700	Complete Genome
GCF_001188835.1_ASM118883v1_genomic.fna	GCF_001188835.1	634176	732	Aggregatibacter aphrophilus NJ8700	strain=NJ8700	Complete Genome
GCF_001743535.1_ViralProj41333_genomic.fna	GCF_001743535.1	683735	683735	Aggregatibacter phage S1249		Complete Genome
GCF_000092025.1_ASM9202v1_genomic.fna	GCF_000092025.1	176299	1176649	Agrobacterium fabrum str. C58	strain=C58	Complete Genome
GCF_000901835.1_ViralProj181226_genomic.fna	GCF_000901835.1	1161931	1161931	Agrobacterium phage 7-7-1		Complete Genome
GCF_000016265.1_ASM1626v1_genomic.fna	GCF_000016265.1	311403	358	Agrobacterium radiobacter K84	strain=K84	Complete Genome
GCF_002005205.2_ASM200520v2_genomic.fna	GCF_002005205.2	359	359	Agrobacterium rhizogenes	strain=K599	Complete Genome
GCF_000192635.1_ASM19263v1_genomic.fna	GCF_000192635.1	861208	861208	Agrobacterium sp. H13-3	strain=H13-3	Complete Genome
GCF_001713475.1_ASM171347v1_genomic.fna	GCF_001713475.1	1842536	1842536	Agrobacterium sp. RAC06	strain=RAC06	Complete Genome
GCF_000971565.1_ASM97156v1_genomic.fna	GCF_000971565.1	358	358	Agrobacterium tumefaciens	strain=Ach5	Complete Genome
GCF_001551895.1_ASM155189v1_genomic.fna	GCF_001551895.1	358	358	Agrobacterium tumefaciens	strain=S33	Complete Genome
GCF_000016285.1_ASM1628v1_genomic.fna	GCF_000016285.1	311402	373	Agrobacterium vitis S4	strain=S4	Complete Genome
GCF_001660485.1_ASM166048v1_genomic.fna	GCF_001660485.1	453304	453304	Agromyces aureus	strain=AR33	Complete Genome
GCF_000856705.1_ViralProj15063_genomic.fna	GCF_000856705.1	41763	41763	Agropyron mosaic virus	strain=ND402	Complete Genome
GCF_000883155.1_ViralProj32171_genomic.fna	GCF_000883155.1	208013	208013	Agrotis ipsilon multiple nucleopolyhedrovirus	strain=Illinois	Complete Genome
GCF_000844105.1_ViralProj14481_genomic.fna	GCF_000844105.1	10464	10464	Agrotis segetum granulovirus		Complete Genome
GCF_000868985.1_ViralProj16661_genomic.fna	GCF_000868985.1	1962501	1962501	Agrotis segetum nucleopolyhedrovirus A		Complete Genome
GCF_000928115.1_ViralProj271033_genomic.fna	GCF_000928115.1	1580580	1580580	Agrotis segetum nucleopolyhedrovirus B		Complete Genome
GCF_000890995.1_ViralMultiSegProj66333_genomic.fna	GCF_000890995.1	1006583	1006583	Aguacate virus	strain=VP-175A	Complete Genome
GCF_000861885.1_ViralProj15441_genomic.fna	GCF_000861885.1	1313215	72149	Aichi virus 1
GCF_001008455.1_ViralProj284019_genomic.fna	GCF_001008455.1	1298633	1298633	Aichivirus C
GCF_002219585.1_ViralProj394300_genomic.fna	GCF_002219585.1	2016454	2016454	Ailuropoda melanoleuca papillomavirus 1	strain=gpam001	Complete Genome
GCF_002219765.1_ViralProj394299_genomic.fna	GCF_002219765.1	2016455	2016455	Ailuropoda melanoleuca papillomavirus 2	strain=gpam002	Complete Genome
GCF_002219945.1_ViralProj394301_genomic.fna	GCF_002219945.1	2016453	2016453	Ailuropoda melanoleuca papillomavirus 4	strain=gpam004	Complete Genome
GCF_002219405.1_ViralProj394302_genomic.fna	GCF_002219405.1	2016448	2016448	Aimelvirus 2	strain=gpai002	Complete Genome
GCF_000898555.1_ViralMultiSegProj173357_genomic.fna	GCF_000898555.1	11582	159148	Aino virus		Complete Genome
GCF_001274085.1_ViralProj293720_genomic.fna	GCF_001274085.1	1692242	1692242	Aiptasia sp. sea anemone associated circular virus		Complete Genome
GCF_000871205.1_ViralMultiSegProj20971_genomic.fna	GCF_000871205.1	70566	1933178	Akabane virus	strain=OBE-1	Complete Genome
GCF_900097105.1_WK001_genomic.fna	GCF_900097105.1	1679444	1679444	Akkermansia glycaniphila		Complete Genome
GCF_001688765.2_ASM168876v2_genomic.fna	GCF_001688765.2	239935	239935	Akkermansia muciniphila	strain=YL44	Complete Genome
GCF_000020225.1_ASM2022v1_genomic.fna	GCF_000020225.1	349741	239935	Akkermansia muciniphila ATCC BAA-835	strain=ATCC BAA-835	Complete Genome
GCF_000967305.2_ASM96730v2_genomic.fna	GCF_000967305.2	511	511	Alcaligenes faecalis	strain=ZD02	Complete Genome
GCF_001641975.2_ASM164197v2_genomic.fna	GCF_001641975.2	511	511	Alcaligenes faecalis	strain=P156	Complete Genome
GCF_000009365.1_ASM936v1_genomic.fna	GCF_000009365.1	393595	59754	Alcanivorax borkumensis SK2	strain=SK2	Complete Genome
GCF_000300005.1_ASM30000v1_genomic.fna	GCF_000300005.1	930169	285091	Alcanivorax dieselolei B5	strain=B5	Complete Genome
GCF_000299335.2_ASM29933v2_genomic.fna	GCF_000299335.2	391936	1306787	Alcanivorax pacificus W11-5	strain=W11-5	Complete Genome
GCF_001010505.1_ASM101050v1_genomic.fna	GCF_001010505.1	1113728	1113728	Alcanivorax sp. NBRC 101098	strain=NBRC 101098	Complete Genome
GCF_002072815.1_ASM207281v1_genomic.fna	GCF_002072815.1	1094342	1094342	Alcanivorax xenomutans	strain=P40	Complete Genome
GCF_000838825.1_ViralProj14099_genomic.fna	GCF_000838825.1	35252	35252	Alcelaphine gammaherpesvirus 1	strain=C500	Complete Genome
GCF_000923715.1_ViralProj253391_genomic.fna	GCF_000923715.1	138184	138184	Alcelaphine gammaherpesvirus 2		Complete Genome
GCF_000838725.1_ViralProj14077_genomic.fna	GCF_000838725.1	28314	1511862	Aleutian mink disease virus	strain=ADV-G	Complete Genome
GCF_001432075.1_ViralProj301025_genomic.fna	GCF_001432075.1	998864	1972639	Alfalfa dwarf virus		Complete Genome
GCF_001634515.1_ViralProj320120_genomic.fna	GCF_001634515.1	1770265	1770265	Alfalfa enamovirus 1		Complete Genome
GCF_000954395.1_ViralProj277201_genomic.fna	GCF_000954395.1	165250	157777	Alfalfa latent virus		Complete Genome
GCF_001271015.1_ViralProj293043_genomic.fna	GCF_001271015.1	1306546	1306546	Alfalfa leaf curl virus		Complete Genome
GCF_000847525.1_ViralMultiSegProj14667_genomic.fna	GCF_000847525.1	12321	12321	Alfalfa mosaic virus		Complete Genome
GCF_002158655.1_ViralProj387743_genomic.fna	GCF_002158655.1	1985968	1985968	Alfalfa virus S		Complete Genome
GCF_000879995.1_ViralProj29883_genomic.fna	GCF_000879995.1	515575	515575	Algerian watermelon mosaic virus		Complete Genome
GCF_001310225.1_ASM131022v1_genomic.fna	GCF_001310225.1	1736674	1736674	Algibacter alginicilyticus	strain=HZ22	Complete Genome
GCF_001593605.1_ASM159360v1_genomic.fna	GCF_001593605.1	1727163	1727163	Algoriphagus sp. M8-2	strain=M8-2	Complete Genome
GCF_000179015.2_ASM17901v2_genomic.fna	GCF_000179015.2	596153	179636	Alicycliphilus denitrificans BC	strain=BC	Complete Genome
GCF_000204645.1_ASM20464v1_genomic.fna	GCF_000204645.1	596154	179636	Alicycliphilus denitrificans K601	strain=K601	Complete Genome
GCF_000024285.1_ASM2428v1_genomic.fna	GCF_000024285.1	521098	405212	Alicyclobacillus acidocaldarius subsp. acidocaldarius DSM 446	strain=DSM 446	Complete Genome
GCF_000219875.1_ASM21987v1_genomic.fna	GCF_000219875.1	1048834	405212	Alicyclobacillus acidocaldarius subsp. acidocaldarius Tc-4-1	strain=Tc-4-1	Complete Genome
GCF_000196495.1_ASM19649v1_genomic.fna	GCF_000196495.1	316275	40269	Aliivibrio salmonicida LFI1238	strain=LFI1238	Complete Genome
GCF_000953695.1_AWOD1_genomic.fna	GCF_000953695.1	80852	80852	Aliivibrio wodanis		Complete Genome
GCF_000265365.1_ASM26536v1_genomic.fna	GCF_000265365.1	679935	214856	Alistipes finegoldii DSM 17242	strain=DSM 17242	Complete Genome
GCF_000014785.1_ASM1478v1_genomic.fna	GCF_000014785.1	187272	351052	Alkalilimnicola ehrlichii MLHE-1	strain=MLHE-1	Complete Genome
GCF_000016985.1_ASM1698v1_genomic.fna	GCF_000016985.1	293826	208226	Alkaliphilus metalliredigens QYMF	strain=QYMF	Complete Genome
GCF_000018325.1_ASM1832v1_genomic.fna	GCF_000018325.1	350688	461876	Alkaliphilus oremlandii OhILAs	strain=OhILAs	Complete Genome
GCF_000863365.1_ViralProj15387_genomic.fna	GCF_000863365.1	172148	33743	Alkhumra hemorrhagic fever virus	strain=1176	Complete Genome
GCF_000874545.1_ViralProj30179_genomic.fna	GCF_000874545.1	452758	452758	Allamanda leaf curl virus		Complete Genome
GCF_000919815.1_ViralProj244665_genomic.fna	GCF_000919815.1	1317107	1317107	Allamanda leaf mottle distortion virus		Complete Genome
GCF_000882735.1_ViralProj34843_genomic.fna	GCF_000882735.1	317027	317027	Allium virus X		Complete Genome
GCF_900070365.1_Alloactinosynnema_sp._L-07_genomic.fna	GCF_900070365.1	1653480	1653480	Alloactinosynnema sp. L-07	strain=L-07	Complete Genome
GCF_000025485.1_ASM2548v1_genomic.fna	GCF_000025485.1	572477	1049	Allochromatium vinosum DSM 180	strain=DSM 180	Complete Genome
GCF_000815225.1_ASM81522v1_genomic.fna	GCF_000815225.1	594679	594679	Allofrancisella guahouensis	strain=08HL01032	Complete Genome
GCF_000872565.1_ViralMultiSegProj28323_genomic.fna	GCF_000872565.1	144752	144752	Allpahuayo mammarenavirus	strain=CLHP-2472	Complete Genome
GCF_000927215.1_ViralProj265890_genomic.fna	GCF_000927215.1	318843	1985693	Almpiwar virus		Complete Genome
GCF_002080195.1_ViralProj381658_genomic.fna	GCF_002080195.1	1970065	1970065	Alpaca polyomavirus		Complete Genome
GCF_000299095.1_ASM29909v1_genomic.fna	GCF_000299095.1	859653	859653	alpha proteobacterium HIMB5	strain=HIMB5	Complete Genome
GCF_000299115.1_ASM29911v1_genomic.fna	GCF_000299115.1	744985	744985	alpha proteobacterium HIMB59	strain=HIMB59	Complete Genome
GCF_000836865.1_ViralProj14025_genomic.fna	GCF_000836865.1	10570	10570	Alphapapillomavirus 12		Complete Genome
GCF_000864725.1_ViralProj15466_genomic.fna	GCF_000864725.1	333766	333766	Alphapapillomavirus 13		Complete Genome
GCF_000862805.1_ViralProj15451_genomic.fna	GCF_000862805.1	333767	333767	Alphapapillomavirus 3		Complete Genome
GCF_000864945.1_ViralProj15512_genomic.fna	GCF_000864945.1	337043	337043	Alphapapillomavirus 4		Complete Genome
GCF_000865665.1_ViralProj15506_genomic.fna	GCF_000865665.1	337042	337042	Alphapapillomavirus 7		Complete Genome
GCF_000863945.3_ViralProj15505_genomic.fna	GCF_000863945.3	337041	337041	Alphapapillomavirus 9		Complete Genome
GCF_000864205.1_ViralProj16076_genomic.fna	GCF_000864205.1	279383	279383	Alphaproteobacteria virus phiJl001		Complete Genome
GCF_000866665.1_ViralProj15687_genomic.fna	GCF_000866665.1	316983	316983	Alstroemeria virus x		Complete Genome
GCF_001008165.2_ASM100816v2_genomic.fna	GCF_001008165.2	1267766	1267766	Altererythrobacter atlanticus	strain=26DY36	Complete Genome
GCF_001698205.1_ASM169820v1_genomic.fna	GCF_001698205.1	692370	692370	Altererythrobacter dongtanensis	strain=KCTC 22672	Complete Genome
GCF_001281485.1_ASM128148v1_genomic.fna	GCF_001281485.1	361183	361183	Altererythrobacter epoxidivorans	strain=CGMCC 1.7731	Complete Genome
GCF_001663155.1_ASM166315v1_genomic.fna	GCF_001663155.1	476157	476157	Altererythrobacter ishigakiensis	strain=NBRC 107699	Complete Genome
GCF_001028625.1_ASM102862v1_genomic.fna	GCF_001028625.1	543877	543877	Altererythrobacter marensis	strain=KCTC 22370	Complete Genome
GCF_001687545.1_ASM168754v1_genomic.fna	GCF_001687545.1	645517	645517	Altererythrobacter namhicola	strain=JCM 16345	Complete Genome
GCF_000866985.1_ViralProj16333_genomic.fna	GCF_000866985.1	85454	85454	Alternanthera mosaic virus		Complete Genome
GCF_000871765.1_ViralProj19833_genomic.fna	GCF_000871765.1	447606	447606	Alternanthera yellow vein betasatellite		Complete Genome
GCF_000866585.1_ViralProj15560_genomic.fna	GCF_000866585.1	337826	337826	Alternanthera yellow vein virus		Complete Genome
GCF_000874585.1_ViralMultiSegProj30367_genomic.fna	GCF_000874585.1	483537	483537	Alternaria alternata virus 1		Complete Genome
GCF_001706985.1_ViralProj339073_genomic.fna	GCF_001706985.1	1826822	1826822	Alternaria arborescens mitovirus 1		Complete Genome
GCF_000928255.1_ViralProj272443_genomic.fna	GCF_000928255.1	1580606	1580606	Alternaria brassicicola betaendornavirus 1		Complete Genome
GCF_001550805.1_ViralProj310788_genomic.fna	GCF_001550805.1	1766767	1766767	Alternaria brassicicola fusarivirus 1		Complete Genome
GCF_000924055.1_ViralProj258281_genomic.fna	GCF_000924055.1	1532031	1532031	Alternaria longipes dsRNA virus 1	strain=HN28	Complete Genome
GCF_001562195.1_ASM156219v1_genomic.fna	GCF_001562195.1	287094	287094	Alteromonas addita	strain=R10SW13	Complete Genome
GCF_000730385.1_ASM73038v1_genomic.fna	GCF_000730385.1	589873	589873	Alteromonas australica	strain=H 17	Complete Genome
GCF_000934525.1_ASM93452v1_genomic.fna	GCF_000934525.1	589873	589873	Alteromonas australica	strain=DE170	Complete Genome
GCF_001562235.1_ASM156223v1_genomic.fna	GCF_001562235.1	28108	28108	Alteromonas macleodii	strain=D7	Complete Genome
GCF_001578515.1_ASM157851v1_genomic.fna	GCF_001578515.1	28108	28108	Alteromonas macleodii	strain=HOT1A3	Complete Genome
GCF_000172635.2_ASM17263v2_genomic.fna	GCF_000172635.2	529120	28108	Alteromonas macleodii ATCC 27126	strain=ATCC 27126	Complete Genome
GCF_000300175.1_ASM30017v1_genomic.fna	GCF_000300175.1	1004787	28108	Alteromonas macleodii str. 'Balearic Sea AD45'	strain=Balearic Sea AD45	Complete Genome
GCF_000299995.1_ASM29999v1_genomic.fna	GCF_000299995.1	1004785	28108	Alteromonas macleodii str. 'Black Sea 11'	strain=Black Sea 11	Complete Genome
GCF_000299955.1_ASM29995v1_genomic.fna	GCF_000299955.1	1004788	28108	Alteromonas macleodii str. 'English Channel 673'	strain=English Channel 673	Complete Genome
GCF_001562315.1_ASM156231v1_genomic.fna	GCF_001562315.1	314275	314275	Alteromonas mediterranea	strain=UM8	Complete Genome
GCF_001886395.1_ASM188639v1_genomic.fna	GCF_001886395.1	314275	314275	Alteromonas mediterranea	strain=CP48	Complete Genome
GCF_001886415.1_ASM188641v1_genomic.fna	GCF_001886415.1	314275	314275	Alteromonas mediterranea	strain=CP49	Complete Genome
GCF_001886435.1_ASM188643v1_genomic.fna	GCF_001886435.1	314275	314275	Alteromonas mediterranea	strain=RG65	Complete Genome
GCF_001886455.1_ASM188645v1_genomic.fna	GCF_001886455.1	314275	314275	Alteromonas mediterranea	strain=AR43	Complete Genome
GCF_000020585.3_ASM2058v3_genomic.fna	GCF_000020585.3	1774373	314275	Alteromonas mediterranea DE	strain=DE	Complete Genome
GCF_000310085.1_ASM31008v1_genomic.fna	GCF_000310085.1	1004786	314275	Alteromonas mediterranea DE1	strain=AltDE1	Complete Genome
GCF_000439495.1_ASM43949v1_genomic.fna	GCF_000439495.1	1300254	314275	Alteromonas mediterranea MED64	strain=MED64	Complete Genome
GCF_000439535.1_ASM43953v1_genomic.fna	GCF_000439535.1	1300256	314275	Alteromonas mediterranea U7	strain=U7	Complete Genome
GCF_000439555.1_ASM43955v1_genomic.fna	GCF_000439555.1	1300257	314275	Alteromonas mediterranea U8	strain=U8	Complete Genome
GCF_000439595.1_ASM43959v1_genomic.fna	GCF_000439595.1	1300259	314275	Alteromonas mediterranea UM4b	strain=UM4b	Complete Genome
GCF_000439575.1_ASM43957v1_genomic.fna	GCF_000439575.1	1300258	314275	Alteromonas mediterranea UM7	strain=UM7	Complete Genome
GCF_000213655.1_ASM21365v1_genomic.fna	GCF_000213655.1	715451	715451	Alteromonas naphthalenivorans	strain=SN2	Complete Genome
GCF_000907735.1_ViralProj209073_genomic.fna	GCF_000907735.1	1300004	1300003	Alteromonas phage vB_AmaP_AD45-P1		Complete Genome
GCF_001562125.1_ASM156212v1_genomic.fna	GCF_001562125.1	1777491	1777491	Alteromonas sp. Mac1	strain=Mac1	Complete Genome
GCF_001886475.1_ASM188647v1_genomic.fna	GCF_001886475.1	1917158	1917158	Alteromonas sp. RW2A1	strain=RW2A1	Complete Genome
GCF_001562115.1_ASM156211v1_genomic.fna	GCF_001562115.1	233316	233316	Alteromonas stellipolaris	strain=LMG 21861	Complete Genome
GCF_001632765.1_ASM163276v1_genomic.fna	GCF_001632765.1	233316	233316	Alteromonas stellipolaris	strain=PQQ-42	Complete Genome
GCF_001632825.1_ASM163282v1_genomic.fna	GCF_001632825.1	233316	233316	Alteromonas stellipolaris	strain=PQQ-44	Complete Genome
GCF_001433715.1_ASM143371v1_genomic.fna	GCF_001433715.1	1160720	233316	Alteromonas stellipolaris LMG 21856	strain=LMG 21856	Complete Genome
GCF_000879015.1_ViralMultiSegProj28321_genomic.fna	GCF_000879015.1	45218	45218	Amapari mammarenavirus	strain=BeAn 70563	Complete Genome
GCF_000874385.1_ViralMultiSegProj21113_genomic.fna	GCF_000874385.1	284687	284687	Amasya cherry disease associated chrysovirus		Complete Genome
GCF_000854105.1_ViralMultiSegProj15010_genomic.fna	GCF_000854105.1	284689	284688	Amasya cherry disease-associated mycovirus		Complete Genome
GCF_000898455.1_ViralMultiSegProj172456_genomic.fna	GCF_000898455.1	1195163	1195163	Amazon lily mild mottle virus	strain=Japan	Complete Genome
GCF_002008455.1_ViralMultiSegProj376923_genomic.fna	GCF_002008455.1	1926500	1926500	Ambe virus	strain=BeAr407981	Complete Genome
GCF_000841005.1_ViralProj14364_genomic.fna	GCF_000841005.1	265294	265294	Ambystoma tigrinum virus	strain=Ambystoma tigrinum stebbensi virus	Complete Genome
GCF_002374935.1_ASM237493v1_genomic.fna	GCF_002374935.1	1908805	1908805	Amdoparvovirus sp.		Complete Genome
GCF_000912275.1_ViralProj226731_genomic.fna	GCF_000912275.1	1344113	1972564	American bat vesiculovirus TFFN-2013		Complete Genome
GCF_000879275.1_ViralMultiSegProj29285_genomic.fna	GCF_000879275.1	465447	519014	American grass carp reovirus	strain=AGCRV_PB01-155	Complete Genome
GCF_000898055.1_ViralProj163147_genomic.fna	GCF_000898055.1	1177630	1177630	American hop latent virus		Complete Genome
GCF_000850385.1_ViralMultiSegProj14742_genomic.fna	GCF_000850385.1	134632	134632	American plum line pattern virus		Complete Genome
GCF_001605015.1_ASM160501v1_genomic.fna	GCF_001605015.1	83263	83263	Aminobacter aminovorans	strain=KCTC 2477	Complete Genome
GCF_000025885.1_ASM2588v1_genomic.fna	GCF_000025885.1	572547	81468	Aminobacterium colombiense DSM 12261	strain=DSM 12261	Complete Genome
GCF_000024605.1_ASM2460v1_genomic.fna	GCF_000024605.1	429009	42838	Ammonifex degensii KC4	strain=KC4	Complete Genome
GCF_000307165.1_ASM30716v1_genomic.fna	GCF_000307165.1	698758	1449	Amphibacillus xylanus NBRC 15112	strain=NBRC 15112	Complete Genome
GCF_002004335.1_ViralProj375051_genomic.fna	GCF_002004335.1	1941435	1941435	Amphibola crenata associated bacilladnavirus 1		Complete Genome
GCF_002004015.1_ViralProj375050_genomic.fna	GCF_002004015.1	1941436	1941436	Amphibola crenata associated bacilladnavirus 2		Complete Genome
GCF_001029005.1_ViralProj286936_genomic.fna	GCF_001029005.1	1661395	1986960	Ampivirus A1	strain=NEWT
GCF_000837185.1_ViralProj14097_genomic.fna	GCF_000837185.1	28321	28321	Amsacta moorei entomopoxvirus		Complete Genome
GCF_000732925.1_ASM73292v1_genomic.fna	GCF_000732925.1	208439	208439	Amycolatopsis japonica	strain=MG417-CF17	Complete Genome
GCF_000454025.1_ASM45402v1_genomic.fna	GCF_000454025.1	1221524	33910	Amycolatopsis mediterranei RB	strain=RB	Complete Genome
GCF_000220945.1_ASM22094v1_genomic.fna	GCF_000220945.1	713604	33910	Amycolatopsis mediterranei S699	strain=S699	Complete Genome
GCF_000282715.1_ASM28271v1_genomic.fna	GCF_000282715.1	713604	33910	Amycolatopsis mediterranei S699	strain=S699	Complete Genome
GCF_000196835.1_ASM19683v1_genomic.fna	GCF_000196835.1	749927	33910	Amycolatopsis mediterranei U32	strain=U32	Complete Genome
GCF_000739085.1_ASM73908v1_genomic.fna	GCF_000739085.1	1068978	1814	Amycolatopsis methanolica 239	strain=239	Complete Genome
GCF_000943515.2_ASM94351v2_genomic.fna	GCF_000943515.2	31958	31958	Amycolatopsis orientalis	strain=B-37	Complete Genome
GCF_000400635.2_ASM40063v2_genomic.fna	GCF_000400635.2	1156913	31958	Amycolatopsis orientalis HCCB10007	strain=HCCB10007	Complete Genome
GCF_000317695.1_ASM31769v1_genomic.fna	GCF_000317695.1	272123	1165	Anabaena cylindrica PCC 7122	strain=PCC 7122	Complete Genome
GCF_000923615.1_ViralProj253321_genomic.fna	GCF_000923615.1	1357732	1357732	Anabaena phage A-4L		Complete Genome
GCF_000312705.1_ASM31270v1_genomic.fna	GCF_000312705.1	46234	46234	Anabaena sp. 90	strain=90	Complete Genome
GCF_001277295.1_ASM127729v1_genomic.fna	GCF_001277295.1	1647413	1647413	Anabaena sp. WA102	strain=WA102	Complete Genome
GCF_900128415.1_PRJEB15655_genomic.fna	GCF_900128415.1	1870984	1870984	Anaerococcus mediterraneensis	strain=Marseille-P2765	Complete Genome
GCF_000024105.1_ASM2410v1_genomic.fna	GCF_000024105.1	525919	33034	Anaerococcus prevotii DSM 20548	strain=DSM 20548	Complete Genome
GCF_000199675.1_ASM19967v1_genomic.fna	GCF_000199675.1	926569	167964	Anaerolinea thermophila UNI-1	strain=UNI-1	Complete Genome
GCF_001717545.1_ASM171754v1_genomic.fna	GCF_001717545.1	1889813	1889813	Anaerolineaceae bacterium oral taxon 439	strain=W11661	Complete Genome
GCF_000022145.1_ASM2214v1_genomic.fna	GCF_000022145.1	455488	161493	Anaeromyxobacter dehalogenans 2CP-1	strain=2CP-1	Complete Genome
GCF_000013385.1_ASM1338v1_genomic.fna	GCF_000013385.1	290397	161493	Anaeromyxobacter dehalogenans 2CP-C	strain=2CP-C	Complete Genome
GCF_000017505.1_ASM1750v1_genomic.fna	GCF_000017505.1	404589	404589	Anaeromyxobacter sp. Fw109-5	strain=Fw109-5	Complete Genome
GCF_000020805.1_ASM2080v1_genomic.fna	GCF_000020805.1	447217	447217	Anaeromyxobacter sp. K	strain=K	Complete Genome
GCF_001998765.1_ASM199876v1_genomic.fna	GCF_001998765.1	649756	649756	Anaerostipes hadrus	strain=BPB5	Complete Genome
GCF_001561955.1_ASM156195v1_genomic.fna	GCF_001561955.1	991789	28446	Anaerotignum propionicum DSM 1682	strain=X2	Complete Genome
GCF_000880855.1_ViralProj32713_genomic.fna	GCF_000880855.1	312275	312275	Anagyris vein yellowing virus		Complete Genome
GCF_001540865.1_ASM154086v1_genomic.fna	GCF_001540865.1	4615	4615	Ananas comosus	cultivar=F153	Chromosome
GCF_000024505.1_ASM2450v1_genomic.fna	GCF_000024505.1	574556	769	Anaplasma centrale str. Israel	strain=Israel	Complete Genome
GCF_000020305.1_ASM2030v1_genomic.fna	GCF_000020305.1	320483	770	Anaplasma marginale str. Florida	strain=Florida	Complete Genome
GCF_000011945.1_ASM1194v1_genomic.fna	GCF_000011945.1	234826	770	Anaplasma marginale str. St. Maries	strain=St. Maries	Complete Genome
GCF_000013125.1_ASM1312v1_genomic.fna	GCF_000013125.1	212042	948	Anaplasma phagocytophilum str. HZ	strain=HZ	Complete Genome
GCF_000439755.1_ASM43975v1_genomic.fna	GCF_000439755.1	1184253	948	Anaplasma phagocytophilum str. HZ2	strain=HZ2	Complete Genome
GCF_000439775.1_ASM43977v1_genomic.fna	GCF_000439775.1	1173064	948	Anaplasma phagocytophilum str. JM	strain=JM	Complete Genome
GCF_000689635.2_ASM68963v2_genomic.fna	GCF_000689635.2	1392507	948	Anaplasma phagocytophilum str. Norway variant2	strain=Norway variant2	Complete Genome
GCF_000885795.1_ViralProj39725_genomic.fna	GCF_000885795.1	104388	104388	Anatid alphaherpesvirus 1	strain=VAC	Complete Genome
GCF_000922615.1_ViralProj261537_genomic.fna	GCF_000922615.1	1542745	1542745	Ancient caribou feces associated virus		Complete Genome
GCF_000906715.1_ViralProj192611_genomic.fna	GCF_000906715.1	73819	73819	Andean potato latent virus		Complete Genome
GCF_000905815.1_ViralProj192605_genomic.fna	GCF_000905815.1	1296569	1296569	Andean potato mild mosaic virus		Complete Genome
GCF_000850405.1_ViralMultiSegProj14746_genomic.fna	GCF_000850405.1	1980456	1980456	Andes orthohantavirus	strain=Chile-9717869	Complete Genome
GCF_000920515.2_ViralProj243492_genomic.fna	GCF_000920515.2	1476485	1476485	Andrographis yellow vein leaf curl betasatellite		Complete Genome
GCF_001441075.1_ViralProj301301_genomic.fna	GCF_001441075.1	1738045	1738045	Andrographis yellow vein leaf curl virus		Complete Genome
GCF_001439585.2_ASM143958v2_genomic.fna	GCF_001439585.2	1450761	1450761	Aneurinibacillus sp. XH2	strain=Xh2	Complete Genome
GCF_000865425.1_ViralProj16334_genomic.fna	GCF_000865425.1	352882	352882	Angelonia flower break virus		Complete Genome
GCF_000915975.1_ViralProj237138_genomic.fna	GCF_000915975.1	1420600	1420600	Anguilla anguilla circovirus		Complete Genome
GCF_000886195.1_ViralProj42931_genomic.fna	GCF_000886195.1	150286	150286	Anguillid herpesvirus 1	strain=500138	Complete Genome
GCF_002008495.1_ViralMultiSegProj376931_genomic.fna	GCF_002008495.1	904722	904722	Anhanga virus	strain=BeAn46852	Complete Genome
GCF_002145785.1_ViralMultiSegProj386346_genomic.fna	GCF_002145785.1	1424613	1424613	Anjozorobe hantavirus	strain=Anjozorobe
GCF_000916855.1_ViralProj237470_genomic.fna	GCF_000916855.1	62099	62099	Anomala cuprea entomopoxvirus	strain=CV6M	Complete Genome
GCF_001646035.1_ViralProj321432_genomic.fna	GCF_001646035.1	1769780	1769780	Anopheles C virus		Complete Genome
GCF_001754965.1_ViralProj345461_genomic.fna	GCF_001754965.1	1906179	1906179	Anopheles flavivirus Liberia
GCF_000880635.1_ViralProj32101_genomic.fna	GCF_000880635.1	487311	1513193	Anopheles gambiae densovirus		Complete Genome
GCF_000918955.1_ViralProj243064_genomic.fna	GCF_000918955.1	1465751	1465751	Anopheles minimus irodovirus		Complete Genome
GCF_000916595.1_ViralMultiSegProj240572_genomic.fna	GCF_000916595.1	1398939	1398939	Anopheline-associated C virus		Complete Genome
GCF_001634285.1_ASM163428v1_genomic.fna	GCF_001634285.1	294699	294699	Anoxybacillus amylolyticus	strain=DSM 15939	Complete Genome
GCF_000019045.1_ASM1904v1_genomic.fna	GCF_000019045.1	491915	33934	Anoxybacillus flavithermus WK1	strain=WK1	Complete Genome
GCF_001187595.1_ASM118759v1_genomic.fna	GCF_001187595.1	198467	198467	Anoxybacillus gonensis	strain=G2	Complete Genome
GCF_001634265.1_ASM163426v1_genomic.fna	GCF_001634265.1	1490052	1490052	Anoxybacillus sp. B2M1	strain=b2m1	Complete Genome
GCF_001634305.1_ASM163430v1_genomic.fna	GCF_001634305.1	1490057	1490057	Anoxybacillus sp. B7M1	strain=b7m1	Complete Genome
GCF_001654285.1_ViralProj323866_genomic.fna	GCF_001654285.1	1648481	1648481	Antarctic picorna-like virus 1		Complete Genome
GCF_001654385.1_ViralProj323865_genomic.fna	GCF_001654385.1	1648482	1648482	Antarctic picorna-like virus 2		Complete Genome
GCF_001654185.1_ViralProj323864_genomic.fna	GCF_001654185.1	1648483	1648483	Antarctic picorna-like virus 3		Complete Genome
GCF_001654105.1_ViralProj323863_genomic.fna	GCF_001654105.1	1648484	1648484	Antarctic picorna-like virus 4		Complete Genome
GCF_000916935.1_ViralProj238830_genomic.fna	GCF_000916935.1	1460071	1460071	Antheraea pernyi iflavirus		Complete Genome
GCF_000867205.1_ViralProj16793_genomic.fna	GCF_000867205.1	161494	161494	Antheraea pernyi nucleopolyhedrovirus	strain=Liaoning	Complete Genome
GCF_001876855.1_ViralProj353087_genomic.fna	GCF_001876855.1	268591	268591	Anticarsia gemmatalis multiple nucleopolyhedrovirus		Complete Genome
GCF_000868545.2_ViralProj17995_genomic.fna	GCF_000868545.2	31507	31507	Anticarsia gemmatalis nucleopolyhedrovirus		Complete Genome
GCF_002219845.1_ViralProj394315_genomic.fna	GCF_002219845.1	1872708	1872708	Antonospora locustae virus 1		Complete Genome
GCF_000896555.1_ViralProj78945_genomic.fna	GCF_000896555.1	50290	50290	Aotine betaherpesvirus 1	strain=S34E	Complete Genome
GCF_000853305.1_ViralProj14867_genomic.fna	GCF_000853305.1	209529	209529	Aphid lethal paralysis virus		Complete Genome
GCF_001444105.1_ViralProj302026_genomic.fna	GCF_001444105.1	1436816	1436816	Aphis glycines virus 1		Complete Genome
GCF_002194445.1_ViralProj390420_genomic.fna	GCF_002194445.1	2005444	2005444	Aphis glycines virus 3		Complete Genome
GCF_002210615.1_ViralProj392131_genomic.fna	GCF_002210615.1	1983569	1983569	Apis dicistrovirus		Complete Genome
GCF_002204045.1_ViralProj390540_genomic.fna	GCF_002204045.1	1983570	1983570	Apis flavivirus		Complete Genome
GCF_001308775.1_ViralProj298047_genomic.fna	GCF_001308775.1	1100043	1100043	Apis mellifera filamentous virus		Chromosome
GCF_000891455.1_ViralProj61905_genomic.fna	GCF_000891455.1	168135	168135	Apium virus Y		Complete Genome
GCF_000900035.1_ViralProj173863_genomic.fna	GCF_000900035.1	307461	307461	Apocheima cinerarium nucleopolyhedrovirus		Complete Genome
GCF_000926195.1_ViralProj261355_genomic.fna	GCF_000926195.1	1036963	1036963	Apodemus sylvaticus papillomavirus 1		Complete Genome
GCF_000863285.1_ViralProj15369_genomic.fna	GCF_000863285.1	64280	64280	Apoi virus	strain=ApMAR	Complete Genome
GCF_000848285.1_ViralProj14658_genomic.fna	GCF_000848285.1	12175	12175	Apple chlorotic leaf spot virus		Complete Genome
GCF_000854605.1_ViralProj14971_genomic.fna	GCF_000854605.1	73494	73494	Apple dimple fruit viroid		Complete Genome
GCF_000853885.1_ViralProj14964_genomic.fna	GCF_000853885.1	190808	190808	Apple fruit crinkle viroid		Complete Genome
GCF_000969055.1_ViralProj280298_genomic.fna	GCF_000969055.1	1633752	1633752	Apple geminivirus PL-2015		Complete Genome
GCF_000898715.1_ViralProj176615_genomic.fna	GCF_000898715.1	1211388	1211388	Apple green crinkle associated virus		Complete Genome
GCF_001429975.1_ViralProj300244_genomic.fna	GCF_001429975.1	1737346	1737346	Apple hammerhead viroid-like circular RNA		Complete Genome
GCF_000861545.1_ViralMultiSegProj15367_genomic.fna	GCF_000861545.1	101688	101688	Apple latent spherical virus		Complete Genome
GCF_000849545.1_ViralMultiSegProj14745_genomic.fna	GCF_000849545.1	12319	12319	Apple mosaic virus		Complete Genome
GCF_000854585.1_ViralProj14967_genomic.fna	GCF_000854585.1	12895	12895	Apple scar skin viroid		Complete Genome
GCF_000859505.1_ViralProj15119_genomic.fna	GCF_000859505.1	28347	28347	Apple stem grooving virus		Complete Genome
GCF_000850465.1_ViralProj14744_genomic.fna	GCF_000850465.1	35350	35350	Apple stem pitting virus	strain=ASPV	Complete Genome
GCF_000888875.1_ViralProj61427_genomic.fna	GCF_000888875.1	75387	75387	Apricot latent virus		Complete Genome
GCF_000858925.1_ViralProj15172_genomic.fna	GCF_000858925.1	307677	307677	Apricot pseudo-chlorotic leaf spot virus		Complete Genome
GCF_000916795.1_ViralProj233521_genomic.fna	GCF_000916795.1	1343920	1343920	Apricot vein clearing associated virus		Complete Genome
GCF_000853585.1_ViralMultiSegProj14900_genomic.fna	GCF_000853585.1	185782	185782	Aquareovirus C	strain=Golden shiner reovirus	Complete Genome
GCF_002002905.1_ASM200290v1_genomic.fna	GCF_002002905.1	1938604	1938604	Aquaspirillum sp. LM1	strain=LM1	Complete Genome
GCF_000008625.1_ASM862v1_genomic.fna	GCF_000008625.1	224324	63363	Aquifex aeolicus VF5	strain=VF5	Complete Genome
GCF_001725875.1_ViralMultiSegProj342649_genomic.fna	GCF_001725875.1	1849335	1849335	Arabidopsis halleri partitivirus 1		Complete Genome
GCF_000001735.3_TAIR10_genomic.fna	GCF_000001735.3	3702	3702	Arabidopsis thaliana	ecotype=Columbia	Chromosome
GCF_000855205.1_ViralMultiSegProj14932_genomic.fna	GCF_000855205.1	12271	12271	Arabis mosaic virus		Complete Genome
GCF_000850505.1_ViralProj14752_genomic.fna	GCF_000850505.1	190809	190809	Arabis mosaic virus large satellite RNA		Complete Genome
GCF_000836845.1_ViralProj14021_genomic.fna	GCF_000836845.1	196399	196399	Arabis mosaic virus small satellite RNA		Complete Genome
GCF_000899115.1_ViralProj173051_genomic.fna	GCF_000899115.1	857288	857288	Arabis mosaic virus small satellite RNA barley
GCF_001659705.1_ASM165970v1_genomic.fna	GCF_001659705.1	1850526	1850526	Arachidicoccus sp. BS20	strain=BS20	Complete Genome
GCF_000817695.2_Aradu1.1_genomic.fna	GCF_000817695.2	130453	130453	Arachis duranensis	cultivar=V14167	Chromosome
GCF_000816755.2_Araip1.1_genomic.fna	GCF_000816755.2	130454	130454	Arachis ipaensis	cultivar=K30076	Chromosome
GCF_001904945.1_ViralProj357486_genomic.fna	GCF_001904945.1	1921009	1921009	Arachis pintoi virus		Complete Genome
GCF_000905955.1_ViralProj194139_genomic.fna	GCF_000905955.1	211977	211977	Aravan lyssavirus		Complete Genome
GCF_000927335.1_ViralProj265914_genomic.fna	GCF_000927335.1	1972683	1972683	Arboretum almendravirus		Complete Genome
GCF_000092365.1_ASM9236v1_genomic.fna	GCF_000092365.1	644284	28264	Arcanobacterium haemolyticum DSM 20595	strain=DSM 20595	Complete Genome
GCF_000870325.1_ViralProj18503_genomic.fna	GCF_000870325.1	416419	416419	Archaeal BJ1 virus		Complete Genome
GCF_000008665.1_ASM866v1_genomic.fna	GCF_000008665.1	224325	2234	Archaeoglobus fulgidus DSM 4304	strain=DSM 4304	Complete Genome
GCF_000734035.1_ASM73403v1_genomic.fna	GCF_000734035.1	1344584	2234	Archaeoglobus fulgidus DSM 8774	strain=DSM 8774	Complete Genome
GCF_000025285.1_ASM2528v1_genomic.fna	GCF_000025285.1	572546	84156	Archaeoglobus profundus DSM 5631	strain=DSM 5631	Complete Genome
GCF_000385565.1_ASM38556v1_genomic.fna	GCF_000385565.1	387631	1316941	Archaeoglobus sulfaticallidus PM70-1	strain=PM70-1	Complete Genome
GCF_000194625.1_ASM19462v1_genomic.fna	GCF_000194625.1	693661	58290	Archaeoglobus veneficus SNP6	strain=SNP6	Complete Genome
GCF_001027285.1_ASM102728v1_genomic.fna	GCF_001027285.1	48	48	Archangium gephyra	strain=DSM 2261	Complete Genome
GCF_000215345.2_ASM21534v3_genomic.fna	GCF_000215345.2	1036172	28197	Arcobacter butzleri 7h1h	strain=7h1h	Complete Genome
GCF_000284355.1_ASM28435v1_genomic.fna	GCF_000284355.1	944546	28197	Arcobacter butzleri ED-1	strain=ED-1	Complete Genome
GCF_000014025.1_ASM1402v1_genomic.fna	GCF_000014025.1	367737	28197	Arcobacter butzleri RM4018	strain=RM4018	Complete Genome
GCF_000092245.1_ASM9224v1_genomic.fna	GCF_000092245.1	572480	28199	Arcobacter nitrofigilis DSM 7299	strain=DSM 7299	Complete Genome
GCF_000284235.1_ASM28423v1_genomic.fna	GCF_000284235.1	944547	944547	Arcobacter sp. L	strain=L	Complete Genome
GCF_001956695.1_ASM195669v1_genomic.fna	GCF_001956695.1	1850254	1850254	Arcobacter sp. LPB0137	strain=LPB0137	Complete Genome
GCF_001019835.1_ViralProj285357_genomic.fna	GCF_001019835.1	1654603	1654603	Areca palm velarivirus 1		Complete Genome
GCF_002289195.1_ViralMultiSegProj244664_genomic.fna	GCF_002289195.1	1585924	1585924	Arhar cryptic virus-I	strain=Hyderabad	Complete Genome
GCF_000923155.1_ViralProj253719_genomic.fna	GCF_000923155.1	72201	345199	Armadillidium vulgare iridescent virus		Complete Genome
GCF_000888675.1_ViralProj56065_genomic.fna	GCF_000888675.1	556524	556524	Armigeres subalbatus virus SaX06-AK20	strain=SaX06-AK20	Complete Genome
GCF_000872985.1_ViralProj18847_genomic.fna	GCF_000872985.1	64303	64303	Aroa virus	strain=Bussuquara virus	Complete Genome
GCF_000025965.1_ASM2596v1_genomic.fna	GCF_000025965.1	76114	551760	Aromatoleum aromaticum EbN1	strain=EbN1	Complete Genome
GCF_001550565.1_ViralProj310910_genomic.fna	GCF_001550565.1	1457322	1457322	Arrabida virus	strain=PoSFPhlebV
GCF_000897375.1_ViralProj171011_genomic.fna	GCF_000897375.1	405558	405558	Arracacha mottle virus		Complete Genome
GCF_000907115.1_ViralMultiSegProj196183_genomic.fna	GCF_000907115.1	257463	257463	Arracacha virus B	strain=oca	Complete Genome
GCF_002116215.1_ViralProj382140_genomic.fna	GCF_002116215.1	1972716	1972716	Arracacha virus V		Complete Genome
GCF_001189535.1_ASM118953v1_genomic.fna	GCF_001189535.1	1658671	1658671	Arsenicicoccus sp. oral taxon 190	strain=F0371	Complete Genome
GCF_001534665.1_ASM153466v1_genomic.fna	GCF_001534665.1	634113	634113	Arsenophonus symbiont of Lipoptena fortisetosa	strain=CB	Complete Genome
GCF_001274325.1_ViralProj293719_genomic.fna	GCF_001274325.1	1692243	1692243	Artemia melana sponge associated circular genome		Complete Genome
GCF_000896195.1_ViralProj165739_genomic.fna	GCF_000896195.1	1133751	1133751	Artemisia virus A		Complete Genome
GCF_001294625.1_ASM129462v1_genomic.fna	GCF_001294625.1	656366	656366	Arthrobacter alpinus	strain=R3.8	Complete Genome
GCF_001445575.1_ASM144557v1_genomic.fna	GCF_001445575.1	656366	656366	Arthrobacter alpinus	strain=ERGS4:06	Complete Genome
GCF_001754425.1_ViralProj344637_genomic.fna	GCF_001754425.1	1796994	1796994	Arthrobacter phage BarretLemon		Complete Genome
GCF_001470355.1_ViralProj306288_genomic.fna	GCF_001470355.1	1698361	1982105	Arthrobacter phage Decurro		Complete Genome
GCF_001755285.1_ViralProj344636_genomic.fna	GCF_001755285.1	1796995	1982237	Arthrobacter phage KellEzio		Complete Genome
GCF_001755705.1_ViralProj344635_genomic.fna	GCF_001755705.1	1796996	1982238	Arthrobacter phage Kitkat		Complete Genome
GCF_001754585.1_ViralProj344344_genomic.fna	GCF_001754585.1	1796997	1982090	Arthrobacter phage Mudcat		Complete Genome
GCF_000911555.1_ViralProj230590_genomic.fna	GCF_000911555.1	1414742	1414742	Arthrobacter phage vB_ArS-ArV2		Complete Genome
GCF_000954695.1_ViralProj276872_genomic.fna	GCF_000954695.1	1566993	1984783	Arthrobacter phage vB_ArtM-ArV1		Complete Genome
GCF_000755585.2_ASM75558v2_genomic.fna	GCF_000755585.2	595593	595593	Arthrobacter sp. A3	strain=A3	Complete Genome
GCF_001542565.1_ASM154256v1_genomic.fna	GCF_001542565.1	1771959	1771959	Arthrobacter sp. ATCC 21022	strain=ATCC 21022	Complete Genome
GCF_001281315.1_ASM128131v1_genomic.fna	GCF_001281315.1	1704044	1704044	Arthrobacter sp. ERGS1:01	strain=ERGS1:01	Complete Genome
GCF_000196235.1_ASM19623v1_genomic.fna	GCF_000196235.1	290399	290399	Arthrobacter sp. FB24	strain=FB24	Complete Genome
GCF_000950575.1_ASM95057v1_genomic.fna	GCF_000950575.1	1618207	1618207	Arthrobacter sp. IHBB 11108	strain=IHBB 11108	Complete Genome
GCF_001281115.1_ASM128111v1_genomic.fna	GCF_001281115.1	1690248	1690248	Arthrobacter sp. LS16	strain=LS16	Complete Genome
GCF_000785535.1_ASM78553v1_genomic.fna	GCF_000785535.1	1494608	1494608	Arthrobacter sp. PAMC 25486	strain=PAMC 25486	Complete Genome
GCF_001969265.1_ASM196926v1_genomic.fna	GCF_001969265.1	1357915	1357915	Arthrobacter sp. QXT-31	strain=QXT-31	Complete Genome
GCF_000294695.2_ASM29469v2_genomic.fna	GCF_000294695.2	1118963	1118963	Arthrobacter sp. Rue61a	strain=Rue61a	Complete Genome
GCF_001750145.1_ASM175014v1_genomic.fna	GCF_001750145.1	1849032	1849032	Arthrobacter sp. U41	strain=U41	Complete Genome
GCF_001454985.1_ASM145498v1_genomic.fna	GCF_001454985.1	1652545	1652545	Arthrobacter sp. YC-RL1	strain=YC-RL1	Complete Genome
GCF_001854365.1_ASM185436v1_genomic.fna	GCF_001854365.1	1806905	1806905	Arthrobacter sp. ZXY-2	strain=ZXY-2	Complete Genome
GCF_000894295.1_ViralProj81739_genomic.fna	GCF_000894295.1	1131485	1131485	Artibeus jamaicensis parvovirus 1		Complete Genome
GCF_000969175.1_ViralProj280116_genomic.fna	GCF_000969175.1	46076	46076	Artichoke latent virus		Complete Genome
GCF_000864965.1_ViralProj15517_genomic.fna	GCF_000864965.1	12142	12142	Artichoke mottled crinkle virus		Complete Genome
GCF_000914815.1_ViralMultiSegProj240065_genomic.fna	GCF_000914815.1	904698	904698	Arumowot virus		Complete Genome
GCF_001547995.1_ASM154799v1_genomic.fna	GCF_001547995.1	1231624	91915	Asaia bogorensis NBRC 16594	strain=NBRC 16594	Complete Genome
GCF_000891115.1_ViralProj66899_genomic.fna	GCF_000891115.1	1027880	1027880	Asclepias asymptomatic virus		Complete Genome
GCF_000924795.1_ViralProj265907_genomic.fna	GCF_000924795.1	351427	351427	Asian prunus virus 1		Complete Genome
GCF_001502755.1_ViralProj307773_genomic.fna	GCF_001502755.1	351426	351426	Asian prunus virus 2		Complete Genome
GCF_001502135.1_ViralProj307772_genomic.fna	GCF_001502135.1	351428	351428	Asian prunus virus 3		Complete Genome
GCF_001876935.1_Aspof.V1_genomic.fna	GCF_001876935.1	4686	4686	Asparagus officinalis		Chromosome
GCF_000928895.1_ViralProj269630_genomic.fna	GCF_000928895.1	443746	443746	Asparagus virus 1		Complete Genome
GCF_000881975.1_ViralMultiSegProj33493_genomic.fna	GCF_000881975.1	39681	39681	Asparagus virus 2		Complete Genome
GCF_000855185.1_ViralProj15099_genomic.fna	GCF_000855185.1	445435	445435	Asparagus virus 3		Complete Genome
GCF_000879175.1_ViralProj28979_genomic.fna	GCF_000879175.1	445435	445435	Asparagus virus 3	strain=J	Complete Genome
GCF_000905675.1_ViralMultiSegProj186431_genomic.fna	GCF_000905675.1	1087068	1087068	Aspergillus foetidus dsRNA mycovirus		Complete Genome
GCF_000012225.1_ASM1222v1_genomic.fna	GCF_000012225.1	322098	229545	Aster yellows witches'-broom phytoplasma AYWB		Complete Genome
GCF_000923275.1_ViralProj255792_genomic.fna	GCF_000923275.1	1522179	1522179	Asterionellopsis glacialis RNA virus		Complete Genome
GCF_000175215.2_ASM17521v2_genomic.fna	GCF_000175215.2	573065	78587	Asticcacaulis excentricus CB 48	strain=CB 48	Complete Genome
GCF_001045265.1_ViralProj288349_genomic.fna	GCF_001045265.1	1671382	1671382	Astrovirus Er
GCF_000880715.1_ViralProj32327_genomic.fna	GCF_000880715.1	568715	568715	Astrovirus MLB1		Complete Genome
GCF_000895575.1_ViralProj76723_genomic.fna	GCF_000895575.1	683172	683172	Astrovirus MLB2
GCF_000899535.1_ViralProj178563_genomic.fna	GCF_000899535.1	1247114	1247114	Astrovirus MLB3
GCF_000885815.1_ViralProj39811_genomic.fna	GCF_000885815.1	645687	645687	Astrovirus VA1		Complete Genome
GCF_000901475.1_ViralProj178564_genomic.fna	GCF_000901475.1	683174	683174	Astrovirus VA3
GCF_000897955.1_ViralProj178562_genomic.fna	GCF_000897955.1	1247113	1247113	Astrovirus VA4
GCF_000895955.1_ViralProj84401_genomic.fna	GCF_000895955.1	1137931	1137931	Astrovirus wild boar
GCF_000943705.1_ViralMultiSegProj276253_genomic.fna	GCF_000943705.1	1611435	1611435	Asystasia mosaic Madagascar virus		Complete Genome
GCF_000902815.1_ViralProj183902_genomic.fna	GCF_000902815.1	1236391	1236391	Ateles paniscus polyomavirus 1		Complete Genome
GCF_002118845.1_ViralProj385640_genomic.fna	GCF_002118845.1	35243	35243	Ateline alphaherpesvirus 1		Complete Genome
GCF_000839425.1_ViralProj14040_genomic.fna	GCF_000839425.1	85618	85618	Ateline gammaherpesvirus 3	strain=73	Complete Genome
GCF_000837505.1_ViralMultiSegProj14164_genomic.fna	GCF_000837505.1	37961	37961	Atkinsonella hypoxylon virus	strain=2H	Complete Genome
GCF_000919195.1_ViralProj245453_genomic.fna	GCF_000919195.1	1489836	1489836	Atlantic salmon calicivirus
GCF_000864385.1_ViralProj16247_genomic.fna	GCF_000864385.1	348296	348296	Atlantic salmon swim bladder sarcoma virus		Complete Genome
GCF_000024225.1_ASM2422v1_genomic.fna	GCF_000024225.1	521095	1382	Atopobium parvulum DSM 20469	strain=DSM 20469	Complete Genome
GCF_001308615.1_ViralProj298040_genomic.fna	GCF_001308615.1	1711685	1711685	Atractylodes mild mottle virus		Complete Genome
GCF_001695485.1_ViralProj330731_genomic.fna	GCF_001695485.1	1873455	1914447	Atypical porcine pestivirus 1
GCF_000852325.1_ViralProj14830_genomic.fna	GCF_000852325.1	44158	44158	Aura virus		Complete Genome
GCF_001041735.1_ViralProj287959_genomic.fna	GCF_001041735.1	1503929	1503929	Aurantimonas phage AmM-1	strain=AmM-1	Complete Genome
GCF_000865185.1_ViralProj16134_genomic.fna	GCF_000865185.1	674971	674971	Aurantiochytrium single-stranded RNA virus 01		Complete Genome
GCF_001442755.1_ASM144275v1_genomic.fna	GCF_001442755.1	1349819	1349819	Aureimonas sp. AU20	strain=AU20	Complete Genome
GCF_000922335.1_ViralProj258005_genomic.fna	GCF_000922335.1	1474867	1474867	Aureococcus anophagefferens virus		Complete Genome
GCF_001989575.1_ASM198957v1_genomic.fna	GCF_001989575.1	1849491	1849491	Auricoccus indicus	strain=S31	Complete Genome
GCF_002354925.1_ViralProj400636_genomic.fna	GCF_002354925.1	2026601	2026601	Australian Anopheles totivirus		Complete Genome
GCF_000850325.1_ViralProj14730_genomic.fna	GCF_000850325.1	90961	90961	Australian bat lyssavirus		Complete Genome
GCF_000854625.1_ViralProj14976_genomic.fna	GCF_000854625.1	190810	190810	Australian grapevine viroid		Complete Genome
GCF_000838485.1_ViralProj14023_genomic.fna	GCF_000838485.1	46015	307456	Autographa californica nucleopolyhedrovirus		Complete Genome
GCF_000844805.1_ViralProj14456_genomic.fna	GCF_000844805.1	219704	219704	Avian adeno-associated virus ATCC VR-865	strain=ATCC VR-865	Complete Genome
GCF_000846565.1_ViralProj14463_genomic.fna	GCF_000846565.1	281492	1511894	Avian adeno-associated virus strain DA-1	strain=DA-1	Complete Genome
GCF_002080355.1_ViralProj264931_genomic.fna	GCF_002080355.1	875624	875624	Avian avulavirus 10
GCF_000924755.1_ViralProj265899_genomic.fna	GCF_000924755.1	1204252	1204252	Avian avulavirus 11
GCF_000927075.1_ViralProj264916_genomic.fna	GCF_000927075.1	1305716	1305716	Avian avulavirus 12
GCF_001654405.1_ViralProj323871_genomic.fna	GCF_001654405.1	2049884	2049884	Avian avulavirus 13	strain=goose
GCF_001433585.1_ViralProj301067_genomic.fna	GCF_001433585.1	35302	35302	Avian avulavirus 2	strain=APMV-2
GCF_000927055.1_ViralProj264912_genomic.fna	GCF_000927055.1	207246	207246	Avian avulavirus 3	strain=turkey
GCF_000901955.1_ViralProj181250_genomic.fna	GCF_000901955.1	28274	28274	Avian avulavirus 4	strain=APMV-4
GCF_000924655.1_ViralProj264935_genomic.fna	GCF_000924655.1	740710	740710	Avian avulavirus 5	strain=budgerigar
GCF_000848585.1_ViralProj14719_genomic.fna	GCF_000848585.1	157619	157619	Avian avulavirus 6	strain=APMV-6
GCF_000926535.1_ViralProj264937_genomic.fna	GCF_000926535.1	622416	622416	Avian avulavirus 7	strain=APMV-7
GCF_000925495.1_ViralProj264936_genomic.fna	GCF_000925495.1	623144	623144	Avian avulavirus 8
GCF_000926655.1_ViralProj265905_genomic.fna	GCF_000926655.1	580247	580247	Avian avulavirus 9	strain=duck
GCF_000921835.1_ViralProj252622_genomic.fna	GCF_000921835.1	675389	675389	Avian bornavirus		Complete Genome
GCF_000849005.1_ViralProj14632_genomic.fna	GCF_000849005.1	11958	11958	Avian carcinoma virus	strain=MH2E21	Complete Genome
GCF_000859965.1_ViralProj15213_genomic.fna	GCF_000859965.1	93465	93465	Avian endogenous retrovirus EAV-HP		Complete Genome
GCF_000891935.1_ViralProj65815_genomic.fna	GCF_000891935.1	1002273	1002273	Avian gyrovirus 2		Complete Genome
GCF_000915995.1_ViralProj237458_genomic.fna	GCF_000915995.1	172851	172851	Avian hepatitis E virus		Complete Genome
GCF_000891575.1_ViralProj62661_genomic.fna	GCF_000891575.1	11946	11864	Avian leukemia virus		Complete Genome
GCF_000849845.1_ViralProj14633_genomic.fna	GCF_000849845.1	11864	11864	Avian leukosis virus		Complete Genome
GCF_000865325.1_ViralProj16240_genomic.fna	GCF_000865325.1	38525	38525	Avian metapneumovirus		Complete Genome
GCF_000853485.1_ViralProj14909_genomic.fna	GCF_000853485.1	11867	11867	Avian myelocytomatosis virus		Complete Genome
GCF_000891595.1_ViralMultiSegProj62875_genomic.fna	GCF_000891595.1	38170	38170	Avian orthoreovirus	strain=AVS-B	Complete Genome
GCF_002197575.1_ViralProj389284_genomic.fna	GCF_002197575.1	1983777	1983777	Avian paramyxovirus 15
GCF_000854225.1_ViralProj15039_genomic.fna	GCF_000854225.1	686983	686983	Avian sapelovirus		Complete Genome
GCF_001651125.1_ViralProj322193_genomic.fna	GCF_001651125.1	1844928	1844928	Avian-like circovirus		Complete Genome
GCF_001502795.1_ViralProj307781_genomic.fna	GCF_001502795.1	1766559	1766559	Avisivirus Pf-CHK1
GCF_000853625.1_ViralProj14908_genomic.fna	GCF_000853625.1	12896	12896	Avocado sunblotch viroid		Complete Genome
GCF_002004635.1_ViralProj375049_genomic.fna	GCF_002004635.1	1941437	1941437	Avon-Heathcote estuary associated bacilladnavirus		Complete Genome
GCF_000954875.1_ViralProj277514_genomic.fna	GCF_000954875.1	1618232	1618232	Avon-Heathcote Estuary associated circular virus 1		Complete Genome
GCF_000954515.1_ViralProj277513_genomic.fna	GCF_000954515.1	1618233	1618233	Avon-Heathcote Estuary associated circular virus 10		Complete Genome
GCF_000955235.1_ViralProj277512_genomic.fna	GCF_000955235.1	1618234	1618234	Avon-Heathcote Estuary associated circular virus 11		Complete Genome
GCF_000955575.1_ViralProj277511_genomic.fna	GCF_000955575.1	1618235	1618235	Avon-Heathcote Estuary associated circular virus 12		Complete Genome
GCF_000954855.1_ViralProj277510_genomic.fna	GCF_000954855.1	1618236	1618236	Avon-Heathcote Estuary associated circular virus 13		Complete Genome
GCF_000954495.1_ViralProj277509_genomic.fna	GCF_000954495.1	1618237	1618237	Avon-Heathcote Estuary associated circular virus 14		Complete Genome
GCF_000955215.1_ViralProj277508_genomic.fna	GCF_000955215.1	1618238	1618238	Avon-Heathcote Estuary associated circular virus 15		Complete Genome
GCF_000955555.1_ViralProj277507_genomic.fna	GCF_000955555.1	1618239	1618239	Avon-Heathcote Estuary associated circular virus 16		Complete Genome
GCF_000954835.1_ViralProj277506_genomic.fna	GCF_000954835.1	1618240	1618240	Avon-Heathcote Estuary associated circular virus 17		Complete Genome
GCF_000955195.1_ViralProj277501_genomic.fna	GCF_000955195.1	1618242	1618242	Avon-Heathcote Estuary associated circular virus 19		Complete Genome
GCF_000955535.1_ViralProj277500_genomic.fna	GCF_000955535.1	1618243	1618243	Avon-Heathcote Estuary associated circular virus 2		Complete Genome
GCF_000954815.1_ViralProj277499_genomic.fna	GCF_000954815.1	1618244	1618244	Avon-Heathcote Estuary associated circular virus 20		Complete Genome
GCF_000954455.1_ViralProj277498_genomic.fna	GCF_000954455.1	1618245	1618245	Avon-Heathcote Estuary associated circular virus 21		Complete Genome
GCF_000955175.1_ViralProj277497_genomic.fna	GCF_000955175.1	1618246	1618246	Avon-Heathcote Estuary associated circular virus 22		Complete Genome
GCF_000955515.1_ViralProj277496_genomic.fna	GCF_000955515.1	1618247	1618247	Avon-Heathcote Estuary associated circular virus 23		Complete Genome
GCF_000954795.1_ViralProj277495_genomic.fna	GCF_000954795.1	1618248	1618248	Avon-Heathcote Estuary associated circular virus 24		Complete Genome
GCF_000954435.1_ViralProj277494_genomic.fna	GCF_000954435.1	1618249	1618249	Avon-Heathcote Estuary associated circular virus 25		Complete Genome
GCF_000955155.1_ViralProj277493_genomic.fna	GCF_000955155.1	1618250	1618250	Avon-Heathcote Estuary associated circular virus 26		Complete Genome
GCF_000955495.1_ViralProj277492_genomic.fna	GCF_000955495.1	1618251	1618251	Avon-Heathcote Estuary associated circular virus 27		Complete Genome
GCF_000954775.1_ViralProj277491_genomic.fna	GCF_000954775.1	1618252	1618252	Avon-Heathcote Estuary associated circular virus 28		Complete Genome
GCF_000954415.1_ViralProj277490_genomic.fna	GCF_000954415.1	1618253	1618253	Avon-Heathcote Estuary associated circular virus 29		Complete Genome
GCF_000954575.1_ViralProj277525_genomic.fna	GCF_000954575.1	1618254	1618254	Avon-Heathcote Estuary associated circular virus 3		Complete Genome
GCF_000955295.1_ViralProj277524_genomic.fna	GCF_000955295.1	1618255	1618255	Avon-Heathcote Estuary associated circular virus 4		Complete Genome
GCF_000955635.1_ViralProj277523_genomic.fna	GCF_000955635.1	1618256	1618256	Avon-Heathcote Estuary associated circular virus 5		Complete Genome
GCF_000954915.1_ViralProj277522_genomic.fna	GCF_000954915.1	1618257	1618257	Avon-Heathcote Estuary associated circular virus 6		Complete Genome
GCF_000954555.1_ViralProj277521_genomic.fna	GCF_000954555.1	1618258	1618258	Avon-Heathcote Estuary associated circular virus 7		Complete Genome
GCF_000955275.1_ViralProj277520_genomic.fna	GCF_000955275.1	1618259	1618259	Avon-Heathcote Estuary associated circular virus 8		Complete Genome
GCF_000955615.1_ViralProj277519_genomic.fna	GCF_000955615.1	1618260	1618260	Avon-Heathcote Estuary associated circular virus 9		Complete Genome
GCF_000920415.1_ViralProj242972_genomic.fna	GCF_000920415.1	1476487	1476487	Axonopus compressus streak virus		Complete Genome
GCF_001682385.1_ASM168238v1_genomic.fna	GCF_001682385.1	418699	418699	Azoarcus olearius	strain=DQS4	Complete Genome
GCF_000061505.1_ASM6150v1_genomic.fna	GCF_000061505.1	62928	62928	Azoarcus sp. BH72	strain=BH72	Complete Genome
GCF_001190925.1_ASM119092v1_genomic.fna	GCF_001190925.1	198107	198107	Azoarcus sp. CIB	strain=CIB	Complete Genome
GCF_000349945.1_ASM34994v1_genomic.fna	GCF_000349945.1	748247	748247	Azoarcus sp. KH32C	strain=KH32C	Complete Genome
GCF_000010525.1_ASM1052v1_genomic.fna	GCF_000010525.1	438753	7	Azorhizobium caulinodans ORS 571	strain=ORS 571	Complete Genome
GCF_000632475.1_ASM63247v2_genomic.fna	GCF_000632475.1	192	192	Azospirillum brasilense	strain=Az39	Complete Genome
GCF_001315015.1_ASM131501v1_genomic.fna	GCF_001315015.1	192	192	Azospirillum brasilense	strain=Sp 7	Complete Genome
GCF_001639105.1_ASM163910v1_genomic.fna	GCF_001639105.1	1226968	1226968	Azospirillum humicireducens	strain=SgZ-5	Complete Genome
GCF_000283655.1_ASM28365v1_genomic.fna	GCF_000283655.1	862719	193	Azospirillum lipoferum 4B	strain=4B	Complete Genome
GCF_000872705.1_ViralProj28841_genomic.fna	GCF_000872705.1	467481	467481	Azospirillum phage Cd		Complete Genome
GCF_000010725.1_ASM1072v1_genomic.fna	GCF_000010725.1	137722	193	Azospirillum sp. B510	strain=B510	Complete Genome
GCF_001305595.1_ASM130559v1_genomic.fna	GCF_001305595.1	528244	528244	Azospirillum thiophilum	strain=BV-S	Complete Genome
GCF_000817975.1_ASM81797v1_genomic.fna	GCF_000817975.1	1328314	353	Azotobacter chroococcum NCIMB 8003	strain=NCIMB 8003	Complete Genome
GCF_000380335.1_ASM38033v1_genomic.fna	GCF_000380335.1	1283330	354	Azotobacter vinelandii CA	strain=CA	Complete Genome
GCF_000380365.1_ASM38036v1_genomic.fna	GCF_000380365.1	1283331	354	Azotobacter vinelandii CA6	strain=CA6	Complete Genome
GCF_000021045.1_ASM2104v1_genomic.fna	GCF_000021045.1	322710	354	Azotobacter vinelandii DJ	strain=DJ; ATCC BAA-1303	Complete Genome
GCF_000912135.1_ViralProj222253_genomic.fna	GCF_000912135.1	11764	196403	Baboon endogenous virus strain M7	strain=M7	Complete Genome
GCF_000891275.1_ViralMultiSegProj71165_genomic.fna	GCF_000891275.1	75888	75888	Baboon orthoreovirus		Complete Genome
GCF_000928715.1_ViralProj268425_genomic.fna	GCF_000928715.1	1379694	1379694	Bacillariodnavirus LDMD-2013		Complete Genome
GCF_000833005.1_ASM83300v1_genomic.fna	GCF_000833005.1	1390	1390	Bacillus amyloliquefaciens	strain=L-H15	Complete Genome
GCF_000973485.1_ASM97348v1_genomic.fna	GCF_000973485.1	1390	1390	Bacillus amyloliquefaciens	strain=L-S60	Complete Genome
GCF_001483885.1_ASM148388v1_genomic.fna	GCF_001483885.1	1390	1390	Bacillus amyloliquefaciens	strain=MBE1283	Complete Genome
GCF_001586105.1_ASM158610v1_genomic.fna	GCF_001586105.1	1390	1390	Bacillus amyloliquefaciens	strain=S499	Complete Genome
GCF_001596755.1_ASM159675v1_genomic.fna	GCF_001596755.1	1390	1390	Bacillus amyloliquefaciens	strain=B15	Complete Genome
GCF_001705195.1_ASM170519v1_genomic.fna	GCF_001705195.1	1390	1390	Bacillus amyloliquefaciens	strain=RD7-7	Complete Genome
GCF_001874385.1_ASM187438v1_genomic.fna	GCF_001874385.1	1390	1390	Bacillus amyloliquefaciens	strain=Y14	Complete Genome
GCF_001889285.1_ASM188928v1_genomic.fna	GCF_001889285.1	1390	1390	Bacillus amyloliquefaciens	strain=LM2303	Complete Genome
GCF_001922005.1_ASM192200v1_genomic.fna	GCF_001922005.1	1390	1390	Bacillus amyloliquefaciens	strain=WS-8	Complete Genome
GCF_000494835.1_ASM49483v1_genomic.fna	GCF_000494835.1	1412898	1390	Bacillus amyloliquefaciens CC178	strain=CC178	Complete Genome
GCF_000196735.1_ASM19673v1_genomic.fna	GCF_000196735.1	692420	1390	Bacillus amyloliquefaciens DSM 7	strain=DSM 7	Complete Genome
GCF_000242855.2_ASM24285v2_genomic.fna	GCF_000242855.2	1091041	1390	Bacillus amyloliquefaciens IT-45	strain=IT-45	Complete Genome
GCF_000835145.1_ASM83514v1_genomic.fna	GCF_000835145.1	1292358	1390	Bacillus amyloliquefaciens KHG19	strain=KHG19	Complete Genome
GCF_000508265.1_ASM50826v1_genomic.fna	GCF_000508265.1	1415165	1390	Bacillus amyloliquefaciens LFB112	strain=LFB112	Complete Genome
GCF_000204275.1_ASM20427v1_genomic.fna	GCF_000204275.1	1001582	1390	Bacillus amyloliquefaciens LL3	strain=LL3	Complete Genome
GCF_000195515.1_ASM19551v1_genomic.fna	GCF_000195515.1	999891	1390	Bacillus amyloliquefaciens TA208	strain=TA208	Complete Genome
GCF_001593785.1_ASM159378v1_genomic.fna	GCF_001593785.1	1434324	1390	Bacillus amyloliquefaciens UMAF6614	strain=UMAF6614	Complete Genome
GCF_001593765.1_ASM159376v1_genomic.fna	GCF_001593765.1	1333538	1390	Bacillus amyloliquefaciens UMAF6639	strain=UMAF6639	Complete Genome
GCF_000221645.1_ASM22164v1_genomic.fna	GCF_000221645.1	1034836	1390	Bacillus amyloliquefaciens XH7	strain=XH7	Complete Genome
GCF_000262385.1_ASM26238v1_genomic.fna	GCF_000262385.1	1126211	1390	Bacillus amyloliquefaciens Y2	strain=Y2	Complete Genome
GCF_000725325.1_ASM72532v1_genomic.fna	GCF_000725325.1	1392	1392	Bacillus anthracis	strain=HYU01	Complete Genome
GCF_000742655.1_ASM74265v1_genomic.fna	GCF_000742655.1	1392	1392	Bacillus anthracis	strain=2000031021	Complete Genome
GCF_000830095.1_ASM83009v1_genomic.fna	GCF_000830095.1	1392	1392	Bacillus anthracis	strain=Ames A0462	Complete Genome
GCF_000832425.1_ASM83242v1_genomic.fna	GCF_000832425.1	1392	1392	Bacillus anthracis	strain=PAK-1	Complete Genome
GCF_000832445.1_ASM83244v1_genomic.fna	GCF_000832445.1	1392	1392	Bacillus anthracis	strain=Vollum 1B	Complete Genome
GCF_000832465.1_ASM83246v1_genomic.fna	GCF_000832465.1	1392	1392	Bacillus anthracis	strain=K3	Complete Genome
GCF_000832505.1_ASM83250v1_genomic.fna	GCF_000832505.1	1392	1392	Bacillus anthracis	strain=Ohio ACB	Complete Genome
GCF_000832565.1_ASM83256v1_genomic.fna	GCF_000832565.1	1392	1392	Bacillus anthracis	strain=SK-102	Complete Genome
GCF_000832585.1_ASM83258v1_genomic.fna	GCF_000832585.1	1392	1392	Bacillus anthracis	strain=Pasteur	Complete Genome
GCF_000832665.1_ASM83266v1_genomic.fna	GCF_000832665.1	1392	1392	Bacillus anthracis	strain=BA1015	Complete Genome
GCF_000832725.1_ASM83272v1_genomic.fna	GCF_000832725.1	1392	1392	Bacillus anthracis	strain=BA1035	Complete Genome
GCF_000832745.1_ASM83274v1_genomic.fna	GCF_000832745.1	1392	1392	Bacillus anthracis	strain=RA3	Complete Genome
GCF_000832965.1_ASM83296v1_genomic.fna	GCF_000832965.1	1392	1392	Bacillus anthracis	strain=2002013094	Complete Genome
GCF_000833065.1_ASM83306v1_genomic.fna	GCF_000833065.1	1392	1392	Bacillus anthracis	strain=Ames	Complete Genome
GCF_000833125.1_ASM83312v1_genomic.fna	GCF_000833125.1	1392	1392	Bacillus anthracis	strain=Canadian_bison	Complete Genome
GCF_000875715.1_ASM87571v1_genomic.fna	GCF_000875715.1	1392	1392	Bacillus anthracis	strain=A1144	Complete Genome
GCF_001543225.1_ASM154322v1_genomic.fna	GCF_001543225.1	1392	1392	Bacillus anthracis	strain=Stendal	Complete Genome
GCF_001654475.1_ASM165447v1_genomic.fna	GCF_001654475.1	1392	1392	Bacillus anthracis	strain=Tangail-1	Complete Genome
GCF_001683065.1_ASM168306v1_genomic.fna	GCF_001683065.1	1392	1392	Bacillus anthracis	strain=Parent2	Complete Genome
GCF_001683095.1_ASM168309v1_genomic.fna	GCF_001683095.1	1392	1392	Bacillus anthracis	strain=Parent1	Complete Genome
GCF_001683135.1_ASM168313v1_genomic.fna	GCF_001683135.1	1392	1392	Bacillus anthracis	strain=PR01	Complete Genome
GCF_001683155.1_ASM168315v1_genomic.fna	GCF_001683155.1	1392	1392	Bacillus anthracis	strain=PR02	Complete Genome
GCF_001683175.1_ASM168317v1_genomic.fna	GCF_001683175.1	1392	1392	Bacillus anthracis	strain=PR05	Complete Genome
GCF_001683195.1_ASM168319v1_genomic.fna	GCF_001683195.1	1392	1392	Bacillus anthracis	strain=PR06	Complete Genome
GCF_001683215.1_ASM168321v1_genomic.fna	GCF_001683215.1	1392	1392	Bacillus anthracis	strain=PR07	Complete Genome
GCF_001683235.1_ASM168323v1_genomic.fna	GCF_001683235.1	1392	1392	Bacillus anthracis	strain=PR08	Complete Genome
GCF_001683255.1_ASM168325v1_genomic.fna	GCF_001683255.1	1392	1392	Bacillus anthracis	strain=PR09-1	Complete Genome
GCF_001683275.1_ASM168327v1_genomic.fna	GCF_001683275.1	1392	1392	Bacillus anthracis	strain=PR09-4	Complete Genome
GCF_001683295.1_ASM168329v1_genomic.fna	GCF_001683295.1	1392	1392	Bacillus anthracis	strain=PR10-4	Complete Genome
GCF_001936375.1_ASM193637v1_genomic.fna	GCF_001936375.1	1392	1392	Bacillus anthracis	strain=Tyrol 4675	Complete Genome
GCF_001990245.1_ASM199024v1_genomic.fna	GCF_001990245.1	1392	1392	Bacillus anthracis	strain=SPV842_15	Complete Genome
GCF_000022865.1_ASM2286v1_genomic.fna	GCF_000022865.1	592021	1392	Bacillus anthracis str. A0248	strain=A0248	Complete Genome
GCF_000512835.2_ASM51283v2_genomic.fna	GCF_000512835.2	743835	1392	Bacillus anthracis str. A16	strain=A16	Complete Genome
GCF_000007845.1_ASM784v1_genomic.fna	GCF_000007845.1	198094	1392	Bacillus anthracis str. Ames	strain=Ames	Complete Genome
GCF_000008445.1_ASM844v1_genomic.fna	GCF_000008445.1	261594	1392	Bacillus anthracis str. 'Ames Ancestor'	strain=Ames Ancestor; A2084	Complete Genome
GCF_000021445.1_ASM2144v1_genomic.fna	GCF_000021445.1	568206	1392	Bacillus anthracis str. CDC 684	strain=CDC 684	Complete Genome
GCF_000258885.1_ASM25888v1_genomic.fna	GCF_000258885.1	768494	1392	Bacillus anthracis str. H9401	strain=H9401	Complete Genome
GCF_000008165.1_ASM816v1_genomic.fna	GCF_000008165.1	260799	1392	Bacillus anthracis str. Sterne	strain=Sterne	Complete Genome
GCF_000832635.1_ASM83263v1_genomic.fna	GCF_000832635.1	260799	1392	Bacillus anthracis str. Sterne	strain=Sterne	Complete Genome
GCF_000583105.1_ASM58310v1_genomic.fna	GCF_000583105.1	1392837	1392	Bacillus anthracis str. SVA11	strain=SVA11	Complete Genome
GCF_000833275.1_ASM83327v1_genomic.fna	GCF_000833275.1	1452727	1392	Bacillus anthracis str. Turkey32	strain=Turkey32	Complete Genome
GCF_000832785.1_ASM83278v1_genomic.fna	GCF_000832785.1	1449979	1392	Bacillus anthracis str. V770-NP-1R	strain=V770-NP-1R	Complete Genome
GCF_000742895.1_ASM74289v1_genomic.fna	GCF_000742895.1	261591	1392	Bacillus anthracis str. Vollum	strain=Vollum	Complete Genome
GCF_000830075.1_ASM83007v1_genomic.fna	GCF_000830075.1	1452	1452	Bacillus atrophaeus	strain=NRS 1221A	Complete Genome
GCF_000165925.1_ASM16592v1_genomic.fna	GCF_000165925.1	720555	1452	Bacillus atrophaeus 1942	strain=1942	Complete Genome
GCF_001721685.1_ASM172168v1_genomic.fna	GCF_001721685.1	632773	632773	Bacillus beveridgei	strain=MLTeJB	Complete Genome
GCF_000831065.1_ASM83106v1_genomic.fna	GCF_000831065.1	1330043	658666	Bacillus bombysepticus str. Wang		Complete Genome
GCF_000177235.2_ASM17723v2_genomic.fna	GCF_000177235.2	649639	1413	Bacillus cellulosilyticus DSM 2522	strain=DSM 2522	Complete Genome
GCF_000635895.2_ASM63589v2_genomic.fna	GCF_000635895.2	1396	1396	Bacillus cereus	strain=A1	Complete Genome
GCF_000789315.1_ASM78931v1_genomic.fna	GCF_000789315.1	1396	1396	Bacillus cereus	strain=03BB87	Complete Genome
GCF_000832525.1_ASM83252v1_genomic.fna	GCF_000832525.1	1396	1396	Bacillus cereus	strain=FM1	Complete Genome
GCF_000832765.1_ASM83276v1_genomic.fna	GCF_000832765.1	1396	1396	Bacillus cereus	strain=3a	Complete Genome
GCF_000835185.1_ASM83518v1_genomic.fna	GCF_000835185.1	1396	1396	Bacillus cereus	strain=S2-8	Complete Genome
GCF_000978375.1_ASM97837v1_genomic.fna	GCF_000978375.1	1396	1396	Bacillus cereus	strain=FORC_005	Complete Genome
GCF_001277915.1_ASM127791v1_genomic.fna	GCF_001277915.1	1396	1396	Bacillus cereus	strain=NJ-W	Complete Genome
GCF_001518875.1_ASM151887v1_genomic.fna	GCF_001518875.1	1396	1396	Bacillus cereus	strain=FORC_013	Complete Genome
GCF_001635915.1_ASM163591v1_genomic.fna	GCF_001635915.1	1396	1396	Bacillus cereus	strain=CMCC P0021	Complete Genome
GCF_001635955.1_ASM163595v1_genomic.fna	GCF_001635955.1	1396	1396	Bacillus cereus	strain=CMCC P0011	Complete Genome
GCF_001635995.1_ASM163599v1_genomic.fna	GCF_001635995.1	1396	1396	Bacillus cereus	strain=HN001	Complete Genome
GCF_001721145.1_ASM172114v1_genomic.fna	GCF_001721145.1	1396	1396	Bacillus cereus	strain=FORC_024	Complete Genome
GCF_001880305.1_ASM188030v1_genomic.fna	GCF_001880305.1	1396	1396	Bacillus cereus	strain=AR156	Complete Genome
GCF_001941885.1_ASM194188v1_genomic.fna	GCF_001941885.1	1396	1396	Bacillus cereus	strain=ISSFR-9F	Complete Genome
GCF_001941905.1_ASM194190v1_genomic.fna	GCF_001941905.1	1396	1396	Bacillus cereus	strain=ISSFR-3F	Complete Genome
GCF_001941925.1_ASM194192v1_genomic.fna	GCF_001941925.1	1396	1396	Bacillus cereus	strain=JEM-2	Complete Genome
GCF_002000005.1_ASM200000v1_genomic.fna	GCF_002000005.1	1396	1396	Bacillus cereus	strain=FORC021	Complete Genome
GCF_000022505.1_ASM2250v1_genomic.fna	GCF_000022505.1	572264	1396	Bacillus cereus 03BB102	strain=03BB102	Complete Genome
GCF_000832405.1_ASM83240v1_genomic.fna	GCF_000832405.1	572264	1396	Bacillus cereus 03BB102	strain=03BB102	Complete Genome
GCF_000832865.1_ASM83286v1_genomic.fna	GCF_000832865.1	451709	1396	Bacillus cereus 03BB108	strain=03BB108	Complete Genome
GCF_000021225.1_ASM2122v1_genomic.fna	GCF_000021225.1	405534	1396	Bacillus cereus AH187	strain=AH187	Complete Genome
GCF_000021785.1_ASM2178v1_genomic.fna	GCF_000021785.1	405535	1396	Bacillus cereus AH820	strain=AH820	Complete Genome
GCF_000008005.1_ASM800v1_genomic.fna	GCF_000008005.1	222523	1396	Bacillus cereus ATCC 10987	strain=ATCC 10987	Complete Genome
GCF_000007825.1_ASM782v1_genomic.fna	GCF_000007825.1	226900	1396	Bacillus cereus ATCC 14579	strain=ATCC 14579	Complete Genome
GCF_000832845.1_ASM83284v1_genomic.fna	GCF_000832845.1	526977	1396	Bacillus cereus ATCC 4342	strain=ATCC 4342	Complete Genome
GCF_000021205.1_ASM2120v1_genomic.fna	GCF_000021205.1	405532	1396	Bacillus cereus B4264	strain=B4264	Complete Genome
GCF_000143605.1_ASM14360v1_genomic.fna	GCF_000143605.1	637380	1396	Bacillus cereus biovar anthracis str. CI	strain=CI	Complete Genome
GCF_000832385.1_ASM83238v1_genomic.fna	GCF_000832385.1	1454382	1396	Bacillus cereus D17	strain=D17	Complete Genome
GCF_000011625.1_ASM1162v1_genomic.fna	GCF_000011625.1	288681	1396	Bacillus cereus E33L	strain=E33L	Complete Genome
GCF_000833045.1_ASM83304v1_genomic.fna	GCF_000833045.1	288681	1396	Bacillus cereus E33L	strain=E33L	Complete Genome
GCF_000239195.1_ASM23919v1_genomic.fna	GCF_000239195.1	347495	1396	Bacillus cereus F837
GCF_000292415.1_ASM29241v1_genomic.fna	GCF_000292415.1	1217984	1396	Bacillus cereus FRI-35	strain=FRI-35	Complete Genome
GCF_000832805.1_ASM83280v1_genomic.fna	GCF_000832805.1	269801	1396	Bacillus cereus G9241	strain=G9241	Complete Genome
GCF_000021305.1_ASM2130v1_genomic.fna	GCF_000021305.1	405531	1396	Bacillus cereus G9842	strain=G9842	Complete Genome
GCF_000283675.1_ASM28367v1_genomic.fna	GCF_000283675.1	334406	1396	Bacillus cereus NC7401	strain=NC7401	Complete Genome
GCF_000013065.1_ASM1306v1_genomic.fna	GCF_000013065.1	361100	1396	Bacillus cereus Q1	strain=Q1	Complete Genome
GCF_000737305.2_ASM73730v2_genomic.fna	GCF_000737305.2	79880	79880	Bacillus clausii	strain=ENTPro	Complete Genome
GCF_000009825.1_ASM982v1_genomic.fna	GCF_000009825.1	66692	79880	Bacillus clausii KSM-K16	strain=KSM-K16	Complete Genome
GCF_000876545.1_ASM87654v1_genomic.fna	GCF_000876545.1	1398	1398	Bacillus coagulans	strain=HM-08	Complete Genome
GCF_001039495.1_ASM103949v1_genomic.fna	GCF_001039495.1	1398	1398	Bacillus coagulans	strain=S-lac	Complete Genome
GCF_001870065.1_ASM187006v1_genomic.fna	GCF_001870065.1	1398	1398	Bacillus coagulans	strain=BC-HY1	Complete Genome
GCF_000217835.1_ASM21783v1_genomic.fna	GCF_000217835.1	941639	1398	Bacillus coagulans 2-6	strain=2-6	Complete Genome
GCF_000169195.2_ASM16919v2_genomic.fna	GCF_000169195.2	345219	1398	Bacillus coagulans 36D1	strain=36D1	Complete Genome
GCF_000832905.1_ASM83290v1_genomic.fna	GCF_000832905.1	1121088	1398	Bacillus coagulans DSM 1 = ATCC 7050	strain=ATCC 7050	Complete Genome
GCF_000017425.1_ASM1742v1_genomic.fna	GCF_000017425.1	315749	580165	Bacillus cytotoxicus NVH 391-98	strain=NVH 391-98	Complete Genome
GCF_000972245.3_ASM97224v3_genomic.fna	GCF_000972245.3	135735	135735	Bacillus endophyticus	strain=Hbe603	Complete Genome
GCF_002024265.1_ASM202426v1_genomic.fna	GCF_002024265.1	86664	86664	Bacillus flexus	strain=KLBMP 4941	Complete Genome
GCF_001719185.1_ASM171918v1_genomic.fna	GCF_001719185.1	79881	79881	Bacillus gibsonii	strain=FJAT-10019	Complete Genome
GCF_900093775.1_EVONIK_BGLY_genomic.fna	GCF_900093775.1	1664069	1664069	Bacillus glycinifermentans		Complete Genome
GCF_000011145.1_ASM1114v1_genomic.fna	GCF_000011145.1	272558	86665	Bacillus halodurans C-125	strain=C-125	Complete Genome
GCF_000473245.1_ASM47324v1_genomic.fna	GCF_000473245.1	1367477	324767	Bacillus infantis NRRL B-14911	strain=NRRL B-14911	Complete Genome
GCF_002109385.1_ASM210938v1_genomic.fna	GCF_002109385.1	199441	199441	Bacillus krulwichiae	strain=AM31D	Complete Genome
GCF_000706725.1_ASM70672v1_genomic.fna	GCF_000706725.1	1246626	300825	Bacillus lehensis G1	strain=G1	Complete Genome
GCF_001596055.1_ASM159605v1_genomic.fna	GCF_001596055.1	1402	1402	Bacillus licheniformis	strain=HRBL-15TDI7	Complete Genome
GCF_001726125.1_ASM172612v1_genomic.fna	GCF_001726125.1	1402	1402	Bacillus licheniformis	strain=BL1202	Complete Genome
GCF_002074075.1_ASM207407v1_genomic.fna	GCF_002074075.1	1402	1402	Bacillus licheniformis	strain=SCK B11	Complete Genome
GCF_002074095.1_ASM207409v1_genomic.fna	GCF_002074095.1	1402	1402	Bacillus licheniformis	strain=SCDB 14	Complete Genome
GCF_002074115.1_ASM207411v1_genomic.fna	GCF_002074115.1	1402	1402	Bacillus licheniformis	strain=SCDB 34	Complete Genome
GCF_002074135.1_ASM207413v1_genomic.fna	GCF_002074135.1	1402	1402	Bacillus licheniformis	strain=SCCB 37	Complete Genome
GCF_002173615.1_ASM217361v1_genomic.fna	GCF_002173615.1	1402	1402	Bacillus licheniformis	strain=SRCM101441	Complete Genome
GCF_002173675.1_ASM217367v1_genomic.fna	GCF_002173675.1	1402	1402	Bacillus licheniformis	strain=SRCM100141	Complete Genome
GCF_002174255.1_ASM217425v1_genomic.fna	GCF_002174255.1	1402	1402	Bacillus licheniformis	strain=SRCM100027	Complete Genome
GCF_000008425.1_ASM842v1_genomic.fna	GCF_000008425.1	279010	1402	Bacillus licheniformis DSM 13 = ATCC 14580	strain=DSM 13	Complete Genome
GCF_000011645.1_ASM1164v1_genomic.fna	GCF_000011645.1	279010	1402	Bacillus licheniformis DSM 13 = ATCC 14580	strain=ATCC 14580; DSM 13	Complete Genome
GCF_002009195.1_ASM200919v1_genomic.fna	GCF_002009195.1	1404	1404	Bacillus megaterium	strain=JX285	Complete Genome
GCF_000025805.1_ASM2580v1_genomic.fna	GCF_000025805.1	592022	1404	Bacillus megaterium DSM 319	strain=DSM 319	Complete Genome
GCF_000832985.1_ASM83298v1_genomic.fna	GCF_000832985.1	1348623	1404	Bacillus megaterium NBRC 15308 = ATCC 14581	strain=ATCC 14581	Complete Genome
GCF_001050455.1_ASM105045v1_genomic.fna	GCF_001050455.1	1452722	1404	Bacillus megaterium Q3	strain=Q3	Complete Genome
GCF_000025825.1_ASM2582v1_genomic.fna	GCF_000025825.1	545693	1404	Bacillus megaterium QM B1551	strain=QM B1551	Complete Genome
GCF_000225265.1_ASM22526v1_genomic.fna	GCF_000225265.1	1006007	1404	Bacillus megaterium WSH-002	strain=WSH-002	Complete Genome
GCF_000724485.1_ASM72448v1_genomic.fna	GCF_000724485.1	796606	1471	Bacillus methanolicus MGA3	strain=MGA3	Complete Genome
GCF_001645685.2_ASM164568v2_genomic.fna	GCF_001645685.2	264697	264697	Bacillus muralis	strain=G25-68	Complete Genome
GCF_000742855.1_ASM74285v1_genomic.fna	GCF_000742855.1	1405	1405	Bacillus mycoides	strain=219298	Complete Genome
GCF_000775975.1_ASM77597v1_genomic.fna	GCF_000775975.1	1405	1405	Bacillus mycoides	strain=WSBC 10204	Complete Genome
GCF_000832605.1_ASM83260v1_genomic.fna	GCF_000832605.1	1405	1405	Bacillus mycoides	strain=ATCC 6462	Complete Genome
GCF_000832885.1_ASM83288v1_genomic.fna	GCF_000832885.1	1405	1405	Bacillus mycoides	strain=BTZ	Complete Genome
GCF_002104575.1_ASM210457v1_genomic.fna	GCF_002104575.1	1405	1405	Bacillus mycoides	strain=Gnyt1	Complete Genome
GCF_000018825.1_ASM1882v1_genomic.fna	GCF_000018825.1	315730	1405	Bacillus mycoides KBAB4	strain=KBAB4	Complete Genome
GCF_000294775.2_ASM29477v2_genomic.fna	GCF_000294775.2	1196031	665099	Bacillus oceanisediminis 2691	strain=2691	Complete Genome
GCF_000876525.1_ASM87652v1_genomic.fna	GCF_000876525.1	1648923	1648923	Bacillus paralicheniformis	strain=BL-09	Complete Genome
GCF_002068155.1_ASM206815v1_genomic.fna	GCF_002068155.1	1648923	1648923	Bacillus paralicheniformis	strain=MDJK30	Complete Genome
GCF_000408885.1_ASM40888v1_genomic.fna	GCF_000408885.1	766760	1648923	Bacillus paralicheniformis ATCC 9945a	strain=ATCC 9945a	Complete Genome
GCF_000871045.1_ViralProj20653_genomic.fna	GCF_000871045.1	458639	458639	Bacillus phage 0305phi8-36		Complete Genome
GCF_001743835.1_ViralProj344146_genomic.fna	GCF_001743835.1	1815509	1815509	Bacillus phage AR9		Complete Genome
GCF_001743675.1_ViralProj344109_genomic.fna	GCF_001743675.1	1874000	1874000	Bacillus phage Aurora		Complete Genome
GCF_001505635.1_ViralProj307901_genomic.fna	GCF_001505635.1	1698451	1984785	Bacillus phage AvesoBmore		Complete Genome
GCF_000897755.1_ViralProj177520_genomic.fna	GCF_000897755.1	1141133	1918005	Bacillus phage B4		Complete Genome
GCF_001736435.1_ViralProj343534_genomic.fna	GCF_001736435.1	1567487	1567487	Bacillus phage BalMu-1		Complete Genome
GCF_000841545.1_ViralProj14311_genomic.fna	GCF_000841545.1	236750	341938	Bacillus phage Bam35c		Complete Genome
GCF_000899475.1_ViralProj177550_genomic.fna	GCF_000899475.1	57477	1918011	Bacillus phage Bastille		Complete Genome
GCF_000900775.1_ViralProj181220_genomic.fna	GCF_000900775.1	1136534	1136534	Bacillus phage BCD7		Complete Genome
GCF_000846925.1_ViralProj14548_genomic.fna	GCF_000846925.1	294382	294382	Bacillus phage BCJA1c		Complete Genome
GCF_000918315.1_ViralProj248632_genomic.fna	GCF_000918315.1	584892	1985176	Bacillus phage Bcp1		Complete Genome
GCF_000898735.1_ViralProj177518_genomic.fna	GCF_000898735.1	1126950	1985182	Bacillus phage BCP78		Complete Genome
GCF_001041555.1_ViralProj287998_genomic.fna	GCF_001041555.1	1129192	1985177	Bacillus phage BCP8-2		Complete Genome
GCF_001743915.1_ViralProj344165_genomic.fna	GCF_001743915.1	1852564	1852564	Bacillus phage Belinda		Complete Genome
GCF_000912355.1_ViralProj227118_genomic.fna	GCF_000912355.1	1406781	1918006	Bacillus phage BigBertha		Complete Genome
GCF_001551665.1_ViralProj310924_genomic.fna	GCF_001551665.1	1755679	1755679	Bacillus phage BM5		Complete Genome
GCF_000921655.1_ViralProj260453_genomic.fna	GCF_000921655.1	1527469	1910936	Bacillus phage Bobb		Complete Genome
GCF_001551765.1_ViralProj310944_genomic.fna	GCF_001551765.1	1445811	1445811	Bacillus phage Bp8p-T		Complete Genome
GCF_000915475.1_ViralProj239432_genomic.fna	GCF_000915475.1	1277886	1277886	Bacillus phage BPS10C		Complete Genome
GCF_000900195.1_ViralProj177519_genomic.fna	GCF_000900195.1	1136731	1987727	Bacillus phage BPS13		Complete Genome
GCF_000898915.1_ViralProj169233_genomic.fna	GCF_000898915.1	1194641	1194641	Bacillus phage BtCS33		Complete Genome
GCF_000920935.1_ViralProj249094_genomic.fna	GCF_000920935.1	1486657	1918012	Bacillus phage CAM003		Complete Genome
GCF_000911315.1_ViralProj227116_genomic.fna	GCF_000911315.1	1406783	1986015	Bacillus phage CampHawk		Complete Genome
GCF_001744995.1_ViralProj344108_genomic.fna	GCF_001744995.1	1874001	1874001	Bacillus phage Claudi		Complete Genome
GCF_000926735.1_ViralProj266642_genomic.fna	GCF_000926735.1	1391188	1918722	Bacillus phage CP-51		Complete Genome
GCF_001745535.1_ViralProj344309_genomic.fna	GCF_001745535.1	1792245	1985179	Bacillus phage Deep Blue		Complete Genome
GCF_001744435.1_ViralProj344126_genomic.fna	GCF_001744435.1	1805948	1805948	Bacillus phage DIGNKC		Complete Genome
GCF_001744355.1_ViralProj344110_genomic.fna	GCF_001744355.1	1873999	1873999	Bacillus phage DirtyBetty		Complete Genome
GCF_001736835.1_ViralProj343524_genomic.fna	GCF_001736835.1	1776293	1776293	Bacillus phage Eldridge		Complete Genome
GCF_000922835.1_ViralProj249096_genomic.fna	GCF_000922835.1	1486658	1486658	Bacillus phage Evoli		Complete Genome
GCF_001501855.1_ViralProj307716_genomic.fna	GCF_001501855.1	1690431	1873999	Bacillus phage Eyuki		Complete Genome
GCF_000867025.1_ViralProj16382_genomic.fna	GCF_000867025.1	345922	345922	Bacillus phage Fah		Complete Genome
GCF_000864165.1_ViralProj15783_genomic.fna	GCF_000864165.1	347962	347962	Bacillus phage Gamma		Complete Genome
GCF_000859725.1_ViralProj15164_genomic.fna	GCF_000859725.1	307240	307240	Bacillus phage GIL16c		Complete Genome
GCF_000913015.1_ViralProj227126_genomic.fna	GCF_000913015.1	1406785	1921017	Bacillus phage Grass		Complete Genome
GCF_000922815.1_ViralProj249092_genomic.fna	GCF_000922815.1	1486659	1987729	Bacillus phage Hakuna		Complete Genome
GCF_000920895.1_ViralProj249093_genomic.fna	GCF_000920895.1	1486660	1486660	Bacillus phage Hoody T		Complete Genome
GCF_001041155.1_ViralProj287993_genomic.fna	GCF_001041155.1	1498212	1985180	Bacillus phage JBP901		Complete Genome
GCF_001504395.1_ViralProj307946_genomic.fna	GCF_001504395.1	1296655	1918723	Bacillus phage JL		Complete Genome
GCF_001745675.1_ViralProj344111_genomic.fna	GCF_001745675.1	1873998	1805952	Bacillus phage Kida		Complete Genome
GCF_002149325.1_ViralProj266637.5_genomic.fna	GCF_002149325.1	1540090	1540090	Bacillus phage Mater		Complete Genome
GCF_000920055.1_ViralProj249095_genomic.fna	GCF_000920055.1	1486661	1987728	Bacillus phage Megatron		Complete Genome
GCF_000910075.1_ViralProj206485_genomic.fna	GCF_000910075.1	1309583	1309583	Bacillus phage MG-B1		Complete Genome
GCF_002149605.1_ViralProj266637.6_genomic.fna	GCF_002149605.1	1540091	1540091	Bacillus phage Moonbeam		Complete Genome
GCF_001743755.1_ViralProj344125_genomic.fna	GCF_001743755.1	1805950	1805950	Bacillus phage Nemo		Complete Genome
GCF_001745075.1_ViralProj344124_genomic.fna	GCF_001745075.1	1805951	1805951	Bacillus phage Nigalana		Complete Genome
GCF_001745735.1_ViralProj344123_genomic.fna	GCF_001745735.1	1805952	1805952	Bacillus phage NotTheCreek		Complete Genome
GCF_000912335.1_ViralProj227113_genomic.fna	GCF_000912335.1	1406786	1921185	Bacillus phage Page		Complete Genome
GCF_001503455.1_ViralProj307919_genomic.fna	GCF_001503455.1	1597966	1921186	Bacillus phage Palmer		Complete Genome
GCF_001501875.1_ViralProj307720_genomic.fna	GCF_001501875.1	1675598	1675598	Bacillus phage Pavlov		Complete Genome
GCF_000898195.1_ViralProj167662_genomic.fna	GCF_000898195.1	1161901	1161901	Bacillus phage PBC1		Complete Genome
GCF_001746175.1_ViralProj344222_genomic.fna	GCF_001746175.1	1868599	1868599	Bacillus phage PfEFR-5		Complete Genome
GCF_000841105.1_ViralProj14217_genomic.fna	GCF_000841105.1	10717	10717	Bacillus phage phi105		Complete Genome
GCF_002149765.1_ViralProj308018.1_genomic.fna	GCF_002149765.1	1643324	1643324	Bacillus phage phi4B1		Complete Genome
GCF_002149545.1_ViralProj308018.2_genomic.fna	GCF_002149545.1	1643326	1643326	Bacillus phage phi4J1		Complete Genome
GCF_000905015.1_ViralProj185318_genomic.fna	GCF_000905015.1	1204533	1910935	Bacillus phage phiAGATE		Complete Genome
GCF_000916355.1_ViralProj240022_genomic.fna	GCF_000916355.1	1357713	1357713	Bacillus phage phiCM3		Complete Genome
GCF_000908075.1_ViralProj213017_genomic.fna	GCF_000908075.1	207656	1921018	Bacillus phage phiNIT1	strain=phiNIT1	Complete Genome
GCF_000902395.1_ViralProj181213_genomic.fna	GCF_000902395.1	1124578	1124578	Bacillus phage phIS3501		Complete Genome
GCF_001744415.1_ViralProj344122_genomic.fna	GCF_001744415.1	1805953	1805953	Bacillus phage Phrodo		Complete Genome
GCF_000907095.1_ViralProj195536_genomic.fna	GCF_000907095.1	547228	547228	Bacillus phage PM1	strain=PM1	Complete Genome
GCF_000911355.1_ViralProj227125_genomic.fna	GCF_000911355.1	1406789	1921188	Bacillus phage Pony		Complete Genome
GCF_000926075.1_ViralProj260451_genomic.fna	GCF_000926075.1	1486662	1918007	Bacillus phage Riley		Complete Genome
GCF_001743735.1_ViralProj344121_genomic.fna	GCF_001743735.1	1805954	1805954	Bacillus phage SageFayge		Complete Genome
GCF_001744615.1_ViralProj344170_genomic.fna	GCF_001744615.1	1837830	1837830	Bacillus phage SalinJah		Complete Genome
GCF_001505855.1_ViralProj307945_genomic.fna	GCF_001505855.1	1296656	1918724	Bacillus phage Shanette		Complete Genome
GCF_001736935.1_ViralProj343488_genomic.fna	GCF_001736935.1	1796992	1796992	Bacillus phage Shbh1		Complete Genome
GCF_000913795.1_ViralProj227114_genomic.fna	GCF_000913795.1	1406790	1921710	Bacillus phage Slash		Complete Genome
GCF_000903255.1_ViralProj181082_genomic.fna	GCF_000903255.1	941058	941058	Bacillus phage SP-10		Complete Genome
GCF_001754685.1_ViralProj344602_genomic.fna	GCF_001754685.1	1792032	1792032	Bacillus phage SP-15		Complete Genome
GCF_001736955.1_ViralProj343492_genomic.fna	GCF_001736955.1	1497851	1921019	Bacillus phage SPG24	strain=SPG24	Complete Genome
GCF_000913815.1_ViralProj227120_genomic.fna	GCF_000913815.1	1406791	1918008	Bacillus phage Spock		Complete Genome
GCF_000847145.1_ViralProj14586_genomic.fna	GCF_000847145.1	10724	10724	Bacillus phage SPP1		Complete Genome
GCF_000913835.1_ViralProj227124_genomic.fna	GCF_000913835.1	1406792	1921712	Bacillus phage Staley		Complete Genome
GCF_001745655.1_ViralProj344107_genomic.fna	GCF_001745655.1	1874002	1874002	Bacillus phage Stitch		Complete Genome
GCF_000880955.1_ViralProj33139_genomic.fna	GCF_000880955.1	565140	57478	Bacillus phage TP21-L		Complete Genome
GCF_000913375.1_ViralProj215668_genomic.fna	GCF_000913375.1	1382932	1918009	Bacillus phage Troll		Complete Genome
GCF_001504235.1_ViralProj307914_genomic.fna	GCF_001504235.1	1690456	1985183	Bacillus phage TsarBomba		Complete Genome
GCF_000915835.1_ViralProj230848_genomic.fna	GCF_000915835.1	1308863	1308863	Bacillus phage vB_BanS-Tsamsa		Complete Genome
GCF_000906215.1_ViralProj195534_genomic.fna	GCF_000906215.1	1195072	1985175	Bacillus phage vB_BceM_Bc431v3		Complete Genome
GCF_001736615.1_ViralProj343525_genomic.fna	GCF_001736615.1	1775140	1775140	Bacillus phage vB_BhaS-171		Complete Genome
GCF_001501795.2_ViralProj307686_genomic.fna	GCF_001501795.2	1445809	1445809	Bacillus phage vB_BtS_BMBtp3		Complete Genome
GCF_001505535.1_ViralProj307881_genomic.fna	GCF_001505535.1	1734382	1734382	Bacillus phage VMY22		Complete Genome
GCF_000896595.1_ViralProj80913_genomic.fna	GCF_000896595.1	764595	1922328	Bacillus phage W.Ph.		Complete Genome
GCF_000925695.1_ViralProj266641_genomic.fna	GCF_000925695.1	1510440	1510440	Bacillus phage Waukesha92		Complete Genome
GCF_000911915.1_ViralProj215653_genomic.fna	GCF_000911915.1	663237	663237	Bacillus phage Wip1		Complete Genome
GCF_001745055.1_ViralProj344120_genomic.fna	GCF_001745055.1	1805956	1805956	Bacillus phage Zuko		Complete Genome
GCF_000005825.2_ASM582v2_genomic.fna	GCF_000005825.2	398511	79885	Bacillus pseudofirmus OF4	strain=OF4	Complete Genome
GCF_000590455.1_ASM59045v1_genomic.fna	GCF_000590455.1	1408	1408	Bacillus pumilus	strain=MTCC B6033	Complete Genome
GCF_000972685.1_ASM97268v1_genomic.fna	GCF_000972685.1	1408	1408	Bacillus pumilus	strain=W3	Complete Genome
GCF_001191605.1_ASM119160v1_genomic.fna	GCF_001191605.1	1408	1408	Bacillus pumilus	strain=GR-8	Complete Genome
GCF_001431145.1_ASM143114v1_genomic.fna	GCF_001431145.1	1408	1408	Bacillus pumilus	strain=NJ-M2	Complete Genome
GCF_001431785.1_ASM143178v1_genomic.fna	GCF_001431785.1	1408	1408	Bacillus pumilus	strain=NJ-V2	Complete Genome
GCF_001548215.1_ASM154821v1_genomic.fna	GCF_001548215.1	1408	1408	Bacillus pumilus	strain=TUAT1	Complete Genome
GCF_001578165.1_ASM157816v1_genomic.fna	GCF_001578165.1	1408	1408	Bacillus pumilus	strain=SH-B11	Complete Genome
GCF_001578205.1_ASM157820v1_genomic.fna	GCF_001578205.1	1408	1408	Bacillus pumilus	strain=SH-B9	Complete Genome
GCF_001700735.1_ASM170073v1_genomic.fna	GCF_001700735.1	1408	1408	Bacillus pumilus	strain=NJ-V	Complete Genome
GCF_001704975.1_ASM170497v1_genomic.fna	GCF_001704975.1	1408	1408	Bacillus pumilus	strain=PDSLzg-1	Complete Genome
GCF_001908475.1_ASM190847v1_genomic.fna	GCF_001908475.1	1408	1408	Bacillus pumilus	strain=GLB197	Complete Genome
GCF_000017885.4_ASM1788v4_genomic.fna	GCF_000017885.4	315750	1408	Bacillus pumilus SAFR-032	strain=SAFR-032	Complete Genome
GCF_001895885.1_ASM189588v1_genomic.fna	GCF_001895885.1	561879	561879	Bacillus safensis	strain=KCTC 12796BP	Complete Genome
GCF_001938665.1_ASM193866v1_genomic.fna	GCF_001938665.1	561879	561879	Bacillus safensis	strain=U14-5	Complete Genome
GCF_001938685.1_ASM193868v1_genomic.fna	GCF_001938685.1	561879	561879	Bacillus safensis	strain=U41	Complete Genome
GCF_001938705.1_ASM193870v1_genomic.fna	GCF_001938705.1	561879	561879	Bacillus safensis	strain=U17-1	Complete Genome
GCF_002077215.1_ASM207721v1_genomic.fna	GCF_002077215.1	561879	561879	Bacillus safensis	strain=BRM1	Complete Genome
GCF_000093085.1_ASM9308v1_genomic.fna	GCF_000093085.1	439292	85683	Bacillus selenitireducens MLS10	strain=MLS10	Complete Genome
GCF_001578185.1_ASM157818v1_genomic.fna	GCF_001578185.1	1478	1478	Bacillus simplex	strain=SH-B26	Complete Genome
GCF_001050115.1_ASM105011v1_genomic.fna	GCF_001050115.1	1479	1479	Bacillus smithii	strain=DSM 4216	Complete Genome
GCF_000952895.1_BS34ACh_genomic.fna	GCF_000952895.1	1409	1409	Bacillus sp.	strain=BS34A	Complete Genome
GCF_000242895.2_ASM24289v3_genomic.fna	GCF_000242895.2	666686	666686	Bacillus sp. 1NLA3E	strain=1NLA3E	Complete Genome
GCF_001999205.1_ASM199920v1_genomic.fna	GCF_001999205.1	1941347	1941347	Bacillus sp. 275	strain=275	Complete Genome
GCF_001831375.1_ASM183137v1_genomic.fna	GCF_001831375.1	1892404	1892404	Bacillus sp. ABP14	strain=ABP14	Complete Genome
GCF_000827045.1_ASM82704v1_genomic.fna	GCF_000827045.1	1570330	1570330	Bacillus sp. BH072	strain=BH072	Complete Genome
GCF_002073415.1_ASM207341v1_genomic.fna	GCF_002073415.1	1839798	1839798	Bacillus sp. FDAARGOS_235	strain=FDAARGOS_235	Complete Genome
GCF_001719225.1_ASM171922v1_genomic.fna	GCF_001719225.1	1837130	1837130	Bacillus sp. FJAT-14266	strain=FJAT-14266	Complete Genome
GCF_001896025.1_ASM189602v1_genomic.fna	GCF_001896025.1	1856406	1856406	Bacillus sp. H15-1	strain=H15-1	Complete Genome
GCF_001648135.1_ASM164813v1_genomic.fna	GCF_001648135.1	1827146	1827146	Bacillus sp. IHB B 7164	strain=IHB B 7164	Complete Genome
GCF_000259365.1_ASM25936v1_genomic.fna	GCF_000259365.1	1127744	1127744	Bacillus sp. JS	strain=JS	Complete Genome
GCF_000978495.1_ASM97849v1_genomic.fna	GCF_000978495.1	1628753	1628753	Bacillus sp. LM 4-2	strain=LM 4-2	Complete Genome
GCF_000829195.1_ASM82919v1_genomic.fna	GCF_000829195.1	98228	98228	Bacillus sp. OxB-1	strain=OxB-1	Complete Genome
GCF_000815145.1_ASM81514v1_genomic.fna	GCF_000815145.1	1446792	1446792	Bacillus sp. Pc3	strain=Pc3	Complete Genome
GCF_001553895.1_ASM155389v1_genomic.fna	GCF_001553895.1	1774743	1774743	Bacillus sp. SDLI1	strain=SDLI1	Complete Genome
GCF_000800825.1_ASM80082v1_genomic.fna	GCF_000800825.1	756828	756828	Bacillus sp. WP8	strain=WP8	Complete Genome
GCF_000747345.1_ASM74734v1_genomic.fna	GCF_000747345.1	1565991	1565991	Bacillus sp. X1(2014)	strain=X1	Complete Genome
GCF_000877815.1_ASM87781v1_genomic.fna	GCF_000877815.1	1574141	1574141	Bacillus sp. YP1	strain=YP1	Complete Genome
GCF_000772125.1_ASM77212v1_genomic.fna	GCF_000772125.1	1423	1423	Bacillus subtilis	strain=ATCC 13952	Complete Genome
GCF_000772165.1_ASM77216v1_genomic.fna	GCF_000772165.1	1423	1423	Bacillus subtilis	strain=ATCC 19217	Complete Genome
GCF_000772205.1_ASM77220v1_genomic.fna	GCF_000772205.1	1423	1423	Bacillus subtilis	strain=Bs-916	Complete Genome
GCF_000782835.1_ASM78283v1_genomic.fna	GCF_000782835.1	1423	1423	Bacillus subtilis	strain=SG6	Complete Genome
GCF_000789295.1_ASM78929v1_genomic.fna	GCF_000789295.1	1423	1423	Bacillus subtilis	strain=PS832	Complete Genome
GCF_000953615.1_BS49Ch_genomic.fna	GCF_000953615.1	1423	1423	Bacillus subtilis	strain=BS49	Complete Genome
GCF_001015095.1_ASM101509v1_genomic.fna	GCF_001015095.1	1423	1423	Bacillus subtilis	strain=UD1022	Complete Genome
GCF_001037985.1_ASM103798v1_genomic.fna	GCF_001037985.1	1423	1423	Bacillus subtilis	strain=TO-A JPC	Complete Genome
GCF_001604995.1_ASM160499v1_genomic.fna	GCF_001604995.1	1423	1423	Bacillus subtilis	strain=SZMC 6179J	Complete Genome
GCF_001704095.1_ASM170409v1_genomic.fna	GCF_001704095.1	1423	1423	Bacillus subtilis	strain=HJ0-6	Complete Genome
GCF_001720505.1_ASM172050v1_genomic.fna	GCF_001720505.1	1423	1423	Bacillus subtilis	strain=BS16045	Complete Genome
GCF_001746575.1_ASM174657v1_genomic.fna	GCF_001746575.1	1423	1423	Bacillus subtilis	strain=BS38	Complete Genome
GCF_001747445.1_ASM174744v1_genomic.fna	GCF_001747445.1	1423	1423	Bacillus subtilis	strain=HRBS-10TDI13	Complete Genome
GCF_001808235.1_ASM180823v1_genomic.fna	GCF_001808235.1	1423	1423	Bacillus subtilis	strain=VV2	Complete Genome
GCF_001889385.1_ASM188938v1_genomic.fna	GCF_001889385.1	1423	1423	Bacillus subtilis	strain=J-5	Complete Genome
GCF_001889625.1_ASM188962v1_genomic.fna	GCF_001889625.1	1423	1423	Bacillus subtilis	strain=MJ01	Complete Genome
GCF_001890405.1_ASM189040v1_genomic.fna	GCF_001890405.1	1423	1423	Bacillus subtilis	strain=KH2	Complete Genome
GCF_001902555.1_ASM190255v1_genomic.fna	GCF_001902555.1	1423	1423	Bacillus subtilis	strain=29R7-12	Complete Genome
GCF_002055965.1_ASM205596v1_genomic.fna	GCF_002055965.1	1423	1423	Bacillus subtilis	strain=NCIB 3610	Complete Genome
GCF_002072735.1_ASM207273v1_genomic.fna	GCF_002072735.1	1423	1423	Bacillus subtilis	strain=GQJK2	Complete Genome
GCF_002096095.1_ASM209609v1_genomic.fna	GCF_002096095.1	1423	1423	Bacillus subtilis	strain=Bs-115	Complete Genome
GCF_002142595.1_ASM214259v1_genomic.fna	GCF_002142595.1	1423	1423	Bacillus subtilis	strain=TLO3	Complete Genome
GCF_000523045.1_ASM52304v1_genomic.fna	GCF_000523045.1	1204342	1423	Bacillus subtilis BEST7003	strain=BEST7003	Complete Genome
GCF_000186745.1_ASM18674v1_genomic.fna	GCF_000186745.1	936156	1423	Bacillus subtilis BSn5	strain=BSn5	Complete Genome
GCF_000973605.1_ASM97360v1_genomic.fna	GCF_000973605.1	1453990	1423	Bacillus subtilis HJ5	strain=HJ5	Complete Genome
GCF_000971925.1_ASM97192v1_genomic.fna	GCF_000971925.1	1136873	1423	Bacillus subtilis KCTC 1028	strain=KCTC 1028	Complete Genome
GCF_000497485.1_ASM49748v1_genomic.fna	GCF_000497485.1	1415167	1423	Bacillus subtilis PY79	strain=PY79	Complete Genome
GCF_000293765.1_ASM29376v1_genomic.fna	GCF_000293765.1	1220533	1423	Bacillus subtilis QB928	strain=QB928	Complete Genome
GCF_001597265.1_ASM159726v1_genomic.fna	GCF_001597265.1	1496303	1423	Bacillus subtilis subsp. globigii	strain=ATCC 49760	Complete Genome
GCF_001534785.1_ASM153478v1_genomic.fna	GCF_001534785.1	483913	1423	Bacillus subtilis subsp. inaquosorum	strain=DE111	Complete Genome
GCF_001565875.1_ASM156587v1_genomic.fna	GCF_001565875.1	86029	1423	Bacillus subtilis subsp. natto	strain=CGMCC 2108	Complete Genome
GCF_000209795.2_ASM20979v2_genomic.fna	GCF_000209795.2	645657	1423	Bacillus subtilis subsp. natto BEST195	strain=BEST195	Complete Genome
GCF_000146565.1_ASM14656v1_genomic.fna	GCF_000146565.1	655816	1423	Bacillus subtilis subsp. spizizenii str. W23	strain=W23	Complete Genome
GCF_000227465.1_ASM22746v1_genomic.fna	GCF_000227465.1	1052585	1423	Bacillus subtilis subsp. spizizenii TU-B-10	strain=TU-B-10	Complete Genome
GCF_000827065.1_ASM82706v1_genomic.fna	GCF_000827065.1	135461	1423	Bacillus subtilis subsp. subtilis	strain=3NA	Complete Genome
GCF_001465815.1_ASM146581v1_genomic.fna	GCF_001465815.1	135461	1423	Bacillus subtilis subsp. subtilis	strain=BSD-2	Complete Genome
GCF_001541905.1_ASM154190v1_genomic.fna	GCF_001541905.1	135461	1423	Bacillus subtilis subsp. subtilis	strain=CU1050	Complete Genome
GCF_001660525.1_ASM166052v1_genomic.fna	GCF_001660525.1	135461	1423	Bacillus subtilis subsp. subtilis	strain=delta6	Complete Genome
GCF_001697265.1_ASM169726v1_genomic.fna	GCF_001697265.1	135461	1423	Bacillus subtilis subsp. subtilis	strain=KCTC 3135	Complete Genome
GCF_001703495.1_ASM170349v1_genomic.fna	GCF_001703495.1	135461	1423	Bacillus subtilis subsp. subtilis	strain=168G	Complete Genome
GCF_002173695.1_ASM217369v1_genomic.fna	GCF_002173695.1	135461	1423	Bacillus subtilis subsp. subtilis	strain=SRCM101444	Complete Genome
GCF_002173715.1_ASM217371v1_genomic.fna	GCF_002173715.1	135461	1423	Bacillus subtilis subsp. subtilis	strain=SRCM100757	Complete Genome
GCF_000344745.1_ASM34474v1_genomic.fna	GCF_000344745.1	1147161	1423	Bacillus subtilis subsp. subtilis 6051-HGW	strain=6051-HGW	Complete Genome
GCF_000009045.1_ASM904v1_genomic.fna	GCF_000009045.1	224308	1423	Bacillus subtilis subsp. subtilis str. 168	strain=168	Complete Genome
GCF_000789275.1_ASM78927v1_genomic.fna	GCF_000789275.1	224308	1423	Bacillus subtilis subsp. subtilis str. 168	strain=168	Complete Genome
GCF_000699525.1_ASM69952v1_genomic.fna	GCF_000699525.1	1221328	1423	Bacillus subtilis subsp. subtilis str. AG1839	strain=AG1839	Complete Genome
GCF_000349795.1_ASM34979v1_genomic.fna	GCF_000349795.1	1302650	1423	Bacillus subtilis subsp. subtilis str. BAB-1	strain=BAB-1	Complete Genome
GCF_000321395.1_ASM32139v1_genomic.fna	GCF_000321395.1	1192196	1423	Bacillus subtilis subsp. subtilis str. BSP1	strain=BSP1	Complete Genome
GCF_000699465.1_ASM69946v1_genomic.fna	GCF_000699465.1	1232554	1423	Bacillus subtilis subsp. subtilis str. JH642 substr. AG174	strain=JH642 substr. AG174	Complete Genome
GCF_000706705.1_ASM70670v1_genomic.fna	GCF_000706705.1	1404258	1423	Bacillus subtilis subsp. subtilis str. OH 131.1	strain=OH 131.1	Complete Genome
GCF_000227485.1_ASM22748v1_genomic.fna	GCF_000227485.1	1052588	1423	Bacillus subtilis subsp. subtilis str. RO-NN-1	strain=RO-NN-1	Complete Genome
GCF_000737405.1_ASM73740v1_genomic.fna	GCF_000737405.1	1340494	1423	Bacillus subtilis TO-A	strain=TO-A	Complete Genome
GCF_000338735.1_ASM33873v1_genomic.fna	GCF_000338735.1	1233100	1423	Bacillus subtilis XF-1	strain=XF-1	Complete Genome
GCF_000774075.2_ASM77407v2_genomic.fna	GCF_000774075.2	1428	1428	Bacillus thuringiensis	strain=XL6	Complete Genome
GCF_000832485.1_ASM83248v1_genomic.fna	GCF_000832485.1	1428	1428	Bacillus thuringiensis	strain=HD1011	Complete Genome
GCF_000832825.1_ASM83282v1_genomic.fna	GCF_000832825.1	1428	1428	Bacillus thuringiensis	strain=HD571	Complete Genome
GCF_000832925.1_ASM83292v1_genomic.fna	GCF_000832925.1	1428	1428	Bacillus thuringiensis	strain=HD682	Complete Genome
GCF_000833085.1_ASM83308v1_genomic.fna	GCF_000833085.1	1428	1428	Bacillus thuringiensis	strain=97-27	Complete Genome
GCF_001017635.1_ASM101763v1_genomic.fna	GCF_001017635.1	1428	1428	Bacillus thuringiensis	strain=YC-10	Complete Genome
GCF_001182785.1_ASM118278v1_genomic.fna	GCF_001182785.1	1428	1428	Bacillus thuringiensis	strain=HS18-1	Complete Genome
GCF_001420855.1_ASM142085v1_genomic.fna	GCF_001420855.1	1428	1428	Bacillus thuringiensis	strain=YWC2-8	Complete Genome
GCF_001455345.1_ASM145534v1_genomic.fna	GCF_001455345.1	1428	1428	Bacillus thuringiensis	strain=CTC	Complete Genome
GCF_001595725.1_ASM159572v1_genomic.fna	GCF_001595725.1	1428	1428	Bacillus thuringiensis	strain=Bt185	Complete Genome
GCF_001598095.1_ASM159809v1_genomic.fna	GCF_001598095.1	1428	1428	Bacillus thuringiensis	strain=HD12	Complete Genome
GCF_001618665.1_ASM161866v1_genomic.fna	GCF_001618665.1	1428	1428	Bacillus thuringiensis	strain=Bc601	Complete Genome
GCF_001692675.1_ASM169267v1_genomic.fna	GCF_001692675.1	1428	1428	Bacillus thuringiensis	strain=KNU-07	Complete Genome
GCF_002025105.1_ASM202510v1_genomic.fna	GCF_002025105.1	1428	1428	Bacillus thuringiensis	strain=L-7601	Complete Genome
GCF_002119445.1_ASM211944v1_genomic.fna	GCF_002119445.1	1428	1428	Bacillus thuringiensis	strain=ATCC 10792	Complete Genome
GCF_002173755.1_ASM217375v1_genomic.fna	GCF_002173755.1	1428	1428	Bacillus thuringiensis	strain=SCG04-02	Complete Genome
GCF_002184245.1_ASM218424v1_genomic.fna	GCF_002184245.1	1428	1428	Bacillus thuringiensis	strain=YGd22-03	Complete Genome
GCF_002192515.1_ASM219251v1_genomic.fna	GCF_002192515.1	1428	1428	Bacillus thuringiensis	strain=BM-BT15426	Complete Genome
GCF_000092165.1_ASM9216v1_genomic.fna	GCF_000092165.1	714359	1428	Bacillus thuringiensis BMB171	strain=BMB171	Complete Genome
GCF_001721165.1_ASM172116v1_genomic.fna	GCF_001721165.1	1423143	1428	Bacillus thuringiensis Bt18247	strain=Bt18247	Complete Genome
GCF_000306745.1_ASM30674v1_genomic.fna	GCF_000306745.1	527021	1428	Bacillus thuringiensis Bt407		Complete Genome
GCF_000835025.1_ASM83502v1_genomic.fna	GCF_000835025.1	1452729	1428	Bacillus thuringiensis HD1002	strain=HD1002	Complete Genome
GCF_000292455.1_ASM29245v1_genomic.fna	GCF_000292455.1	1218175	1428	Bacillus thuringiensis HD-771	strain=HD-771	Complete Genome
GCF_000292705.1_ASM29270v1_genomic.fna	GCF_000292705.1	1217737	1428	Bacillus thuringiensis HD-789	strain=HD-789	Complete Genome
GCF_000300475.1_ASM30047v1_genomic.fna	GCF_000300475.1	1195464	1428	Bacillus thuringiensis MC28	strain=MC28	Complete Genome
GCF_001640965.1_ASM164096v1_genomic.fna	GCF_001640965.1	1440	1428	Bacillus thuringiensis serovar alesti	strain=BGSC 4C1	Complete Genome
GCF_000193355.1_ASM19335v1_genomic.fna	GCF_000193355.1	541229	1428	Bacillus thuringiensis serovar chinensis CT-43	strain=CT-43	Complete Genome
GCF_000190515.1_ASM19051v1_genomic.fna	GCF_000190515.1	930170	1428	Bacillus thuringiensis serovar finitimus YBT-020	strain=YBT-020	Complete Genome
GCF_000803665.1_ASM80366v1_genomic.fna	GCF_000803665.1	29338	1428	Bacillus thuringiensis serovar galleriae	strain=HD-29	Complete Genome
GCF_001183785.1_ASM118378v1_genomic.fna	GCF_001183785.1	180850	1428	Bacillus thuringiensis serovar indiana	strain=HD521	Complete Genome
GCF_000008505.1_ASM850v1_genomic.fna	GCF_000008505.1	281309	1428	Bacillus thuringiensis serovar konkukian str. 97-27	strain=97-27	Complete Genome
GCF_000717535.1_ASM71753v1_genomic.fna	GCF_000717535.1	1261129	1428	Bacillus thuringiensis serovar kurstaki str. HD-1	strain=HD-1	Complete Genome
GCF_000338755.1_ASM33875v1_genomic.fna	GCF_000338755.1	1279365	1428	Bacillus thuringiensis serovar kurstaki str. HD73	strain=HD73	Complete Genome
GCF_000688795.1_ASM68879v1_genomic.fna	GCF_000688795.1	570416	1428	Bacillus thuringiensis serovar kurstaki str. YBT-1520	strain=YBT-1520	Complete Genome
GCF_000747545.1_ASM74754v1_genomic.fna	GCF_000747545.1	570416	1428	Bacillus thuringiensis serovar kurstaki str. YBT-1520	strain=YBT-1520	Complete Genome
GCF_000940785.1_ASM94078v1_genomic.fna	GCF_000940785.1	1441	1428	Bacillus thuringiensis serovar morrisoni	strain=BGSC 4AA1	Complete Genome
GCF_000341665.1_ASM34166v1_genomic.fna	GCF_000341665.1	1286404	1428	Bacillus thuringiensis serovar thuringiensis str. IS5056	strain=IS5056	Complete Genome
GCF_001548175.1_ASM154817v1_genomic.fna	GCF_001548175.1	1442	1428	Bacillus thuringiensis serovar tolworthi	strain=Pasteur Institute Standard strain	Complete Genome
GCF_000015065.1_ASM1506v1_genomic.fna	GCF_000015065.1	412694	1428	Bacillus thuringiensis str. Al Hakam	strain=Al Hakam	Complete Genome
GCF_000497525.1_ASM49752v2_genomic.fna	GCF_000497525.1	529122	1428	Bacillus thuringiensis YBT-1518	strain=YBT-1518	Complete Genome
GCF_000496285.1_ASM49628v1_genomic.fna	GCF_000496285.1	1415784	155322	Bacillus toyonensis BCT-7112	strain=BCT-7112	Complete Genome
GCF_002113805.1_ASM211380v1_genomic.fna	GCF_002113805.1	72361	72361	Bacillus vallismortis	strain=NBIF-001	Complete Genome
GCF_000769555.1_ASM76955v1_genomic.fna	GCF_000769555.1	492670	492670	Bacillus velezensis	strain=JS25R	Complete Genome
GCF_000987825.1_ASM98782v1_genomic.fna	GCF_000987825.1	492670	492670	Bacillus velezensis	strain=JJ-D34	Complete Genome
GCF_000988345.1_ASM98834v1_genomic.fna	GCF_000988345.1	492670	492670	Bacillus velezensis	strain=YJ11-1-4	Complete Genome
GCF_001023595.1_ASM102359v1_genomic.fna	GCF_001023595.1	492670	492670	Bacillus velezensis	strain=G341	Complete Genome
GCF_001536925.1_BMC_PRJEB12378v1_genomic.fna	GCF_001536925.1	492670	492670	Bacillus velezensis	strain=B25	Complete Genome
GCF_001593395.2_ASM159339v2_genomic.fna	GCF_001593395.2	492670	492670	Bacillus velezensis	strain=CC09	Complete Genome
GCF_001685645.1_ASM168564v1_genomic.fna	GCF_001685645.1	492670	492670	Bacillus velezensis	strain=S3-1	Complete Genome
GCF_001687745.1_ASM168774v1_genomic.fna	GCF_001687745.1	492670	492670	Bacillus velezensis	strain=LS69	Complete Genome
GCF_001723585.1_ASM172358v1_genomic.fna	GCF_001723585.1	492670	492670	Bacillus velezensis	strain=M75	Complete Genome
GCF_001752685.1_ASM175268v1_genomic.fna	GCF_001752685.1	492670	492670	Bacillus velezensis	strain=D2-2	Complete Genome
GCF_001854345.1_ASM185434v1_genomic.fna	GCF_001854345.1	492670	492670	Bacillus velezensis	strain=SYBC H47	Complete Genome
GCF_001857985.1_ASM185798v1_genomic.fna	GCF_001857985.1	492670	492670	Bacillus velezensis	strain=9912D	Complete Genome
GCF_002005345.1_ASM200534v1_genomic.fna	GCF_002005345.1	492670	492670	Bacillus velezensis	strain=GH1-13	Complete Genome
GCF_002057535.1_ASM205753v1_genomic.fna	GCF_002057535.1	492670	492670	Bacillus velezensis	strain=sx01604	Complete Genome
GCF_002072695.1_ASM207269v1_genomic.fna	GCF_002072695.1	492670	492670	Bacillus velezensis	strain=JTYP2	Complete Genome
GCF_002105595.1_ASM210559v1_genomic.fna	GCF_002105595.1	492670	492670	Bacillus velezensis	strain=9D-6	Complete Genome
GCF_002117165.1_ASM211716v1_genomic.fna	GCF_002117165.1	492670	492670	Bacillus velezensis	strain=CBMB205	Complete Genome
GCF_002157265.1_ASM215726v1_genomic.fna	GCF_002157265.1	492670	492670	Bacillus velezensis	strain=ZL918	Complete Genome
GCF_002192235.1_ASM219223v1_genomic.fna	GCF_002192235.1	492670	492670	Bacillus velezensis	strain=GQJK49	Complete Genome
GCF_000319475.1_ASM31947v1_genomic.fna	GCF_000319475.1	1225788	492670	Bacillus velezensis AS43.3	strain=AS43.3	Complete Genome
GCF_000283695.1_ASM28369v1_genomic.fna	GCF_000283695.1	1114958	492670	Bacillus velezensis CAU B946	strain=CAU B946	Complete Genome
GCF_000015785.1_ASM1578v1_genomic.fna	GCF_000015785.1	326423	492670	Bacillus velezensis FZB42	strain=FZB42	Complete Genome
GCF_000493375.1_BAPNAU_WGS_genomic.fna	GCF_000493375.1	1385727	492670	Bacillus velezensis NAU-B3	strain=NAU-B3	Complete Genome
GCF_000973585.1_ASM97358v1_genomic.fna	GCF_000973585.1	1458206	492670	Bacillus velezensis NJN-6	strain=NJN-6	Complete Genome
GCF_000685725.1_ASM68572v1_genomic.fna	GCF_000685725.1	1423138	492670	Bacillus velezensis SQR9	strain=SQR9	Complete Genome
GCF_000583065.1_ASM58306v1_genomic.fna	GCF_000583065.1	1449088	492670	Bacillus velezensis TrigoCor1448	strain=TrigoCor1448	Complete Genome
GCF_000455565.1_ucmb5033v1_genomic.fna	GCF_000455565.1	1338518	492670	Bacillus velezensis UCMB5033	strain=UCMB-5033	Complete Genome
GCF_000341875.1_ASM34187v1_genomic.fna	GCF_000341875.1	1150475	492670	Bacillus velezensis UCMB5036	strain=UCMB5036	Complete Genome
GCF_000455585.1_ucmb5113v1_genomic.fna	GCF_000455585.1	1150476	492670	Bacillus velezensis UCMB5113	strain=UCMB5113	Complete Genome
GCF_000284395.1_ASM28439v1_genomic.fna	GCF_000284395.1	1155777	492670	Bacillus velezensis YAU B9601-Y2	strain=YAU B9601-Y2	Complete Genome
GCF_000873445.1_ViralProj20397_genomic.fna	GCF_000873445.1	396034	396034	Bacillus virus 1		Complete Genome
GCF_001500675.1_ViralProj307766_genomic.fna	GCF_001500675.1	701257	701257	Bacillus virus 250		Complete Genome
GCF_000904275.1_ViralProj192872_genomic.fna	GCF_000904275.1	1273739	1273739	Bacillus virus Andromeda		Complete Genome
GCF_000881695.1_ViralProj32599_genomic.fna	GCF_000881695.1	513550	513550	Bacillus virus AP50		Complete Genome
GCF_000840305.1_ViralProj14216_genomic.fna	GCF_000840305.1	10778	10778	Bacillus virus B103		Complete Genome
GCF_000912395.1_ViralProj227127_genomic.fna	GCF_000912395.1	1406782	1406782	Bacillus virus Blastoid		Complete Genome
GCF_000904835.1_ViralProj184152_genomic.fna	GCF_000904835.1	1236573	1236573	Bacillus virus BMBtp2		Complete Genome
GCF_000905895.1_ViralProj192873_genomic.fna	GCF_000905895.1	1273740	1273740	Bacillus virus Curly		Complete Genome
GCF_000905295.1_ViralProj192874_genomic.fna	GCF_000905295.1	1273741	1273741	Bacillus virus Eoghan		Complete Genome
GCF_000906775.1_ViralProj192875_genomic.fna	GCF_000906775.1	1273742	1273742	Bacillus virus Finn		Complete Genome
GCF_000917535.1_ViralProj240716_genomic.fna	GCF_000917535.1	1084719	1084719	Bacillus virus G	strain=G	Complete Genome
GCF_000858305.1_ViralProj15202_genomic.fna	GCF_000858305.1	12345	12345	Bacillus virus GA1		Complete Genome
GCF_000912995.1_ViralProj227122_genomic.fna	GCF_000912995.1	1406784	1406784	Bacillus virus Glittering		Complete Genome
GCF_000881435.1_ViralProj31057_genomic.fna	GCF_000881435.1	552525	552525	Bacillus virus IEBH		Complete Genome
GCF_002149225.1_ViralProj266637.7_genomic.fna	GCF_002149225.1	1921187	1921187	Bacillus virus Pascal		Complete Genome
GCF_000880275.1_ViralProj30615_genomic.fna	GCF_000880275.1	10756	10756	Bacillus virus phi29		Complete Genome
GCF_002149425.1_ViralProj266637.8_genomic.fna	GCF_002149425.1	1921189	1921189	Bacillus virus Pookie		Complete Genome
GCF_000912375.1_ViralProj227123_genomic.fna	GCF_000912375.1	1406788	1406788	Bacillus virus Riggi		Complete Genome
GCF_000837685.1_ViralProj14034_genomic.fna	GCF_000837685.1	66797	66797	Bacillus virus SPbeta		Complete Genome
GCF_000881675.1_ViralProj32379_genomic.fna	GCF_000881675.1	10685	10685	Bacillus virus SPO1		Complete Genome
GCF_002149345.1_ViralProj266637.9_genomic.fna	GCF_002149345.1	1921711	1921711	Bacillus virus Stahl		Complete Genome
GCF_002149365.1_ViralProj266637.10_genomic.fna	GCF_002149365.1	1921713	1921713	Bacillus virus Stills		Complete Genome
GCF_000864445.1_ViralProj16329_genomic.fna	GCF_000864445.1	359961	359961	Bacillus virus Wbeta		Complete Genome
GCF_001889165.1_ASM188916v1_genomic.fna	GCF_001889165.1	1547283	1547283	Bacillus weihaiensis	strain=Alg07	Complete Genome
GCF_001857925.1_ASM185792v1_genomic.fna	GCF_001857925.1	1178537	1178537	Bacillus xiamenensis	strain=VV3	Complete Genome
GCF_000882435.1_ViralProj32705_genomic.fna	GCF_000882435.1	340054	340054	Bacteriophage APSE-2		Complete Genome
GCF_001503475.1_ViralProj307923_genomic.fna	GCF_001503475.1	1589751	1589751	Bacteriophage Lily		Complete Genome
GCF_000473305.1_ASM47330v1_genomic.fna	GCF_000473305.1	1400053	1400053	Bacteroidales bacterium CF	strain=CF	Complete Genome
GCF_001688725.2_ASM168872v2_genomic.fna	GCF_001688725.2	1796613	1796613	Bacteroides caecimuris	strain=I48	Complete Genome
GCF_001318345.1_ASM131834v1_genomic.fna	GCF_001318345.1	246787	246787	Bacteroides cellulosilyticus	strain=WH2	Complete Genome
GCF_001640865.1_ASM164086v1_genomic.fna	GCF_001640865.1	997877	357276	Bacteroides dorei CL03T12C01	strain=CL03T12C01	Complete Genome
GCF_000965785.1_ASM96578v1_genomic.fna	GCF_000965785.1	817	817	Bacteroides fragilis	strain=BOB25	Complete Genome
GCF_001286525.1_BFBE1.1_genomic.fna	GCF_001286525.1	817	817	Bacteroides fragilis	strain=BE1	Complete Genome
GCF_001682215.1_ASM168221v1_genomic.fna	GCF_001682215.1	817	817	Bacteroides fragilis	strain=S14	Complete Genome
GCF_000210835.1_ASM21083v1_genomic.fna	GCF_000210835.1	862962	817	Bacteroides fragilis 638R	strain=638R	Complete Genome
GCF_000025985.1_ASM2598v1_genomic.fna	GCF_000025985.1	272559	817	Bacteroides fragilis NCTC 9343		Complete Genome
GCF_000009925.1_ASM992v1_genomic.fna	GCF_000009925.1	295405	817	Bacteroides fragilis YCH46	strain=YCH46	Complete Genome
GCF_000186225.1_ASM18622v1_genomic.fna	GCF_000186225.1	693979	290053	Bacteroides helcogenes P 36-108	strain=P 36-108	Complete Genome
GCF_001314995.1_ASM131499v1_genomic.fna	GCF_001314995.1	28116	28116	Bacteroides ovatus	strain=ATCC 8483	Complete Genome
GCF_900095495.1_B_ovatus_V975_genomic.fna	GCF_900095495.1	1379690	28116	Bacteroides ovatus V975	strain=V975	Complete Genome
GCF_000895315.1_ViralProj82753_genomic.fna	GCF_000895315.1	1105171	1105171	Bacteroides phage B124-14		Complete Genome
GCF_000883035.1_ViralProj31249_genomic.fna	GCF_000883035.1	99179	99179	Bacteroides phage B40-8		Complete Genome
GCF_000190575.1_ASM19057v1_genomic.fna	GCF_000190575.1	667015	376805	Bacteroides salanitronis DSM 18170	strain=DSM 18170	Complete Genome
GCF_001314975.1_ASM131497v1_genomic.fna	GCF_001314975.1	818	818	Bacteroides thetaiotaomicron	strain=7330	Complete Genome
GCF_000011065.1_ASM1106v1_genomic.fna	GCF_000011065.1	226186	818	Bacteroides thetaiotaomicron VPI-5482	strain=VPI-5482	Complete Genome
GCF_000012825.1_ASM1282v1_genomic.fna	GCF_000012825.1	435590	821	Bacteroides vulgatus ATCC 8482	strain=ATCC 8482	Complete Genome
GCF_000973355.1_ViralProj281125_genomic.fna	GCF_000973355.1	1634484	1634484	Badger associated gemykibivirus 1	strain=588t	Complete Genome
GCF_000883735.1_ViralProj36619_genomic.fna	GCF_000883735.1	64290	64290	Bagaza virus	strain=DakAr B209	Complete Genome
GCF_002029575.1_ViralProj379136_genomic.fna	GCF_002029575.1	1966007	1966007	Bakunsa virus
GCF_000924075.1_ViralProj259246_genomic.fna	GCF_000924075.1	1986118	1986118	Ball python nidovirus 1	strain=07-53	Complete Genome
GCF_002366085.1_ViralProj354191_genomic.fna	GCF_002366085.1	1972684	1972684	Balsa almendravirus	strain=CoB 84	Complete Genome
GCF_002004915.1_ViralProj375036_genomic.fna	GCF_002004915.1	1805494	1805494	Bamaga virus		Complete Genome
GCF_000847825.1_ViralProj14728_genomic.fna	GCF_000847825.1	35286	35286	Bamboo mosaic virus		Complete Genome
GCF_000850485.1_ViralProj14748_genomic.fna	GCF_000850485.1	190811	190811	Bamboo mosaic virus satellite RNA		Complete Genome
GCF_000917875.1_ViralProj242951_genomic.fna	GCF_000917875.1	1229324	1229324	Baminivirus		Complete Genome
GCF_000871865.1_ViralProj20617_genomic.fna	GCF_000871865.1	45661	45661	Banana bract mosaic virus		Complete Genome
GCF_000847305.1_ViralMultiSegProj14621_genomic.fna	GCF_000847305.1	12585	12585	Banana bunchy top virus		Complete Genome
GCF_000848545.1_ViralProj14711_genomic.fna	GCF_000848545.1	148879	148879	Banana mild mosaic virus		Complete Genome
GCF_000891095.1_ViralProj66617_genomic.fna	GCF_000891095.1	1016852	1016852	Banana streak CA virus		Complete Genome
GCF_000862625.1_ViralProj15411_genomic.fna	GCF_000862625.1	328670	328670	Banana streak GF virus	strain=Goldfinger	Complete Genome
GCF_000892735.1_ViralProj66619_genomic.fna	GCF_000892735.1	1016853	1016853	Banana streak IM virus		Complete Genome
GCF_000858465.1_ViralProj15234_genomic.fna	GCF_000858465.1	1476909	1476909	Banana streak MY virus		Complete Genome
GCF_000857505.1_ViralProj15239_genomic.fna	GCF_000857505.1	328671	328671	Banana streak OL virus		Complete Genome
GCF_000891075.1_ViralProj66609_genomic.fna	GCF_000891075.1	1016854	1016854	Banana streak UA virus		Complete Genome
GCF_000892715.1_ViralProj66611_genomic.fna	GCF_000892715.1	1016855	1016855	Banana streak UI virus		Complete Genome
GCF_000892055.1_ViralProj66613_genomic.fna	GCF_000892055.1	1016856	1016856	Banana streak UL virus		Complete Genome
GCF_000893615.1_ViralProj66615_genomic.fna	GCF_000893615.1	1016857	1016857	Banana streak UM virus		Complete Genome
GCF_000867185.1_ViralProj16747_genomic.fna	GCF_000867185.1	69577	69577	Banana streak virus		Complete Genome
GCF_000859245.1_ViralProj15240_genomic.fna	GCF_000859245.1	1411991	1411991	Banana streak VN virus	strain=Acuminata Vietnam	Complete Genome
GCF_000872365.1_ViralProj27985_genomic.fna	GCF_000872365.1	479058	479058	Bandicoot papillomatosis carcinomatosis virus type 1		Complete Genome
GCF_000880095.1_ViralProj30081_genomic.fna	GCF_000880095.1	500654	500654	Bandicoot papillomatosis carcinomatosis virus type 2		Complete Genome
GCF_001430175.1_ViralProj300243_genomic.fna	GCF_001430175.1	1737522	2006147	Bank vole polyomavirus
GCF_000858185.1_ViralMultiSegProj15178_genomic.fna	GCF_000858185.1	649604	77763	Banna virus strain JKT-6423	strain=JKT-6423	Complete Genome
GCF_001754105.2_ViralProj310876_genomic.fna	GCF_001754105.2	38837	38837	Banzi virus	strain=IBAN 10069	Complete Genome
GCF_000892615.1_ViralProj65821_genomic.fna	GCF_000892615.1	759938	759938	Barbel circovirus		Complete Genome
GCF_000884415.1_ViralMultiSegProj41605_genomic.fna	GCF_000884415.1	43761	43761	Barfin flounder nervous necrosis virus		Complete Genome
GCF_000862285.1_ViralMultiSegProj15338_genomic.fna	GCF_000862285.1	12466	12466	Barley mild mosaic virus	strain=common	Complete Genome
GCF_000855725.1_ViralMultiSegProj15031_genomic.fna	GCF_000855725.1	12327	12327	Barley stripe mosaic virus	strain=type strain (ATCC-PV43)	Complete Genome
GCF_001630025.1_ViralProj319115_genomic.fna	GCF_001630025.1	1825924	1825924	Barley virus G		Complete Genome
GCF_000854205.1_ViralProj15035_genomic.fna	GCF_000854205.1	224578	224578	Barley yellow dwarf virus-GAV		Complete Genome
GCF_000907695.1_ViralProj208540_genomic.fna	GCF_000907695.1	1304863	1304863	Barley yellow dwarf virus-kerII		Complete Genome
GCF_000850645.1_ViralProj14781_genomic.fna	GCF_000850645.1	12038	12038	Barley yellow dwarf virus-MAV		Complete Genome
GCF_000850165.1_ViralProj14698_genomic.fna	GCF_000850165.1	228581	228581	Barley yellow dwarf virus-PAS		Complete Genome
GCF_000859045.1_ViralProj15196_genomic.fna	GCF_000859045.1	12040	12040	Barley yellow dwarf virus-PAV		Complete Genome
GCF_000860765.1_ViralMultiSegProj15362_genomic.fna	GCF_000860765.1	12465	12465	Barley yellow mosaic virus		Complete Genome
GCF_001432155.1_ViralProj301026_genomic.fna	GCF_001432155.1	1985699	1985699	Barley yellow striate mosaic cytorhabdovirus	strain=Hebei	Complete Genome
GCF_000847585.1_ViralProj14679_genomic.fna	GCF_000847585.1	11020	11020	Barmah Forest virus	strain=BH2193	Complete Genome
GCF_000512915.1_ASM51291v1_genomic.fna	GCF_000512915.1	880074	397865	Barnesiella viscericola DSM 18177	strain=C46, DSM 18177	Complete Genome
GCF_001281405.1_ASM128140v1_genomic.fna	GCF_001281405.1	1318743	1318743	Bartonella ancashensis	strain=20.00	Complete Genome
GCF_002007485.1_ASM200748v1_genomic.fna	GCF_002007485.1	1686310	1686310	Bartonella apis	strain=BBC0178	Complete Genome
GCF_002007505.1_ASM200750v1_genomic.fna	GCF_002007505.1	1686310	1686310	Bartonella apis	strain=BBC0244	Complete Genome
GCF_002007565.1_ASM200756v1_genomic.fna	GCF_002007565.1	1686310	1686310	Bartonella apis	strain=BBC0122	Complete Genome
GCF_000341355.1_ASM34135v1_genomic.fna	GCF_000341355.1	1094489	388640	Bartonella australis Aust
GCF_001559035.1_ASM155903v1_genomic.fna	GCF_001559035.1	774	774	Bartonella bacilliformis	strain=ATCC:35685D-5	Complete Genome
GCF_000015445.1_ASM1544v1_genomic.fna	GCF_000015445.1	360095	774	Bartonella bacilliformis KC583	strain=KC583; ATCC 35685	Complete Genome
GCF_000253015.1_ASM25301v1_genomic.fna	GCF_000253015.1	696125	56426	Bartonella clarridgeiae 73	strain=73	Complete Genome
GCF_000022725.1_ASM2272v1_genomic.fna	GCF_000022725.1	634504	33045	Bartonella grahamii as4aup	strain=as4aup	Complete Genome
GCF_000612765.1_PRJEB5998_assembly_1_genomic.fna	GCF_000612765.1	38323	38323	Bartonella henselae	strain=BM1374165	Complete Genome
GCF_000612965.1_PRJEB4971_assembly_1_genomic.fna	GCF_000612965.1	38323	38323	Bartonella henselae	strain=BM1374163	Complete Genome
GCF_001291465.1_Bartonella_henselae_MVT02_genomic.fna	GCF_001291465.1	38323	38323	Bartonella henselae	strain=MVT02	Complete Genome
GCF_000046705.1_ASM4670v1_genomic.fna	GCF_000046705.1	283166	38323	Bartonella henselae str. Houston-1	strain=Houston-1	Complete Genome
GCF_000046685.1_ASM4668v1_genomic.fna	GCF_000046685.1	283165	803	Bartonella quintana str. Toulouse	strain=Toulouse	Complete Genome
GCF_002022485.1_ASM202248v1_genomic.fna	GCF_002022485.1	1933910	1933910	Bartonella sp. A1379B	strain=A1379B	Complete Genome
GCF_002022605.1_ASM202260v1_genomic.fna	GCF_002022605.1	1933906	1933906	Bartonella sp. JB15	strain=JB15	Complete Genome
GCF_002022665.1_ASM202266v1_genomic.fna	GCF_002022665.1	1933907	1933907	Bartonella sp. JB63	strain=JB63	Complete Genome
GCF_002022585.1_ASM202258v1_genomic.fna	GCF_002022585.1	1933912	1933912	Bartonella sp. Raccoon60	strain=Raccoon60	Complete Genome
GCF_002022505.1_ASM202250v1_genomic.fna	GCF_002022505.1	1933904	1933904	Bartonella sp. WD16.2	strain=WD16.2	Complete Genome
GCF_000689355.1_PRJEB5999_assembly_1_genomic.fna	GCF_000689355.1	85701	85701	Bartonella tribocorum	strain=BM1374166	Complete Genome
GCF_000196435.1_ASM19643v1_genomic.fna	GCF_000196435.1	382640	85701	Bartonella tribocorum CIP 105476		Complete Genome
GCF_000341385.1_ASM34138v1_genomic.fna	GCF_000341385.1	1094497	33047	Bartonella vinsonii subsp. berkhoffii str. Winnie	strain=Winnie	Complete Genome
GCF_002145665.1_ViralProj386362_genomic.fna	GCF_002145665.1	1978534	1978534	Barur ledantevirus	strain=6235	Complete Genome
GCF_002375015.1_ASM237501v1_genomic.fna	GCF_002375015.1	1930507	1930507	Basavirus sp.		Complete Genome
GCF_000874125.1_ViralProj20619_genomic.fna	GCF_000874125.1	373398	373398	Basella rugose mosaic virus		Complete Genome
GCF_000743945.1_ASM74394v1_genomic.fna	GCF_000743945.1	1072685	1472345	Basilea psittacipulmonis DSM 24701	strain=DSM 24701	Complete Genome
GCF_001925475.1_ViralProj359251_genomic.fna	GCF_001925475.1	1906173	1906173	Bastrovirus
GCF_001926815.1_ViralProj359250_genomic.fna	GCF_001926815.1	1906175	2025398	Bastrovirus
GCF_002285025.1_ViralProj401021_genomic.fna	GCF_002285025.1	2025396	2025396	Bastrovirus BAS-1		Complete Genome
GCF_002271045.1_ViralProj399943_genomic.fna	GCF_002271045.1	2025397	2025397	Bastrovirus BAS-2		Complete Genome
GCF_001925335.1_ViralProj359252_genomic.fna	GCF_001925335.1	1906170	1906170	Bastrovirus-like_virus
GCF_000888555.1_ViralProj51735_genomic.fna	GCF_000888555.1	727962	727962	Bat adeno-associated virus YNM	strain=YNM	Complete Genome
GCF_000893815.1_ViralProj72369_genomic.fna	GCF_000893815.1	696069	1146874	Bat adenovirus 2	strain=PPV1	Complete Genome
GCF_002008875.1_ViralProj376936_genomic.fna	GCF_002008875.1	1958785	1958785	Bat badicivirus 1		Complete Genome
GCF_002008675.1_ViralProj376935_genomic.fna	GCF_002008675.1	1958786	1958786	Bat badicivirus 2		Complete Genome
GCF_001564365.1_ViralProj312360_genomic.fna	GCF_001564365.1	1329649	1329649	Bat bocavirus		Complete Genome
GCF_000908355.1_ViralProj202887_genomic.fna	GCF_000908355.1	1329650	1329650	Bat circovirus		Complete Genome
GCF_002355085.1_ViralProj406967_genomic.fna	GCF_002355085.1	1329650	1329650	Bat circovirus		Complete Genome
GCF_000929875.1_ViralProj268861_genomic.fna	GCF_000929875.1	1572239	1987735	Bat circovirus POA
GCF_000930515.1_ViralProj268862_genomic.fna	GCF_000930515.1	1572237	1987737	Bat circovirus POA
GCF_002118885.1_ViralProj385635_genomic.fna	GCF_002118885.1	1508220	1508220	Bat coronavirus
GCF_000879255.1_ViralProj29247_genomic.fna	GCF_000879255.1	393767	393767	Bat coronavirus 1A	strain=AFCD62	Complete Genome
GCF_000887595.1_ViralProj51751_genomic.fna	GCF_000887595.1	864596	864596	Bat coronavirus BM48-31
GCF_000913415.1_ViralProj215863_genomic.fna	GCF_000913415.1	1384461	1913643	Bat coronavirus CDPHE15
GCF_002008575.1_ViralProj376917_genomic.fna	GCF_002008575.1	1958776	1958776	Bat crohivirus		Complete Genome
GCF_002145985.1_ViralProj386348_genomic.fna	GCF_002145985.1	795381	2050928	Bat cyclovirus GF-4c		Complete Genome
GCF_002008695.1_ViralProj376914_genomic.fna	GCF_002008695.1	1958784	1958784	Bat dicibavirus		Complete Genome
GCF_001882015.3_ViralProj353501.1_genomic.fna	GCF_001882015.3	1325446	1325446	Bat hepacivirus		Complete Genome
GCF_000905615.1_ViralProj195535_genomic.fna	GCF_000905615.1	1303386	1303386	Bat hepatitis virus		Complete Genome
GCF_001443765.1_ViralProj302021_genomic.fna	GCF_001443765.1	1745250	1745250	Bat hepatovirus		Complete Genome
GCF_000898475.1_ViralProj172460_genomic.fna	GCF_000898475.1	1216472	1216472	Bat hepevirus
GCF_000926915.1_ViralProj263036_genomic.fna	GCF_000926915.1	1541205	1541205	Bat Hp-betacoronavirus
GCF_002008415.1_ViralProj376915_genomic.fna	GCF_002008415.1	1958778	1958778	Bat iflavirus		Complete Genome
GCF_002008715.1_ViralProj376918_genomic.fna	GCF_002008715.1	1958775	1958775	Bat kunsagivirus		Complete Genome
GCF_001885425.1_ViralProj353920_genomic.fna	GCF_001885425.1	740971	740971	Bat mastadenovirus		Complete Genome
GCF_000894355.2_ViralProj84399_genomic.fna	GCF_000894355.2	1146877	1146877	Bat mastadenovirus A	strain=TJM	Complete Genome
GCF_002366205.1_ViralProj390621_genomic.fna	GCF_002366205.1	2015376	2015376	Bat mastadenovirus G		Complete Genome
GCF_001630065.1_ViralProj319066_genomic.fna	GCF_001630065.1	1788432	2015370	Bat mastadenovirus WIV10		Complete Genome
GCF_001630005.1_ViralProj319065_genomic.fna	GCF_001630005.1	1788433	2015370	Bat mastadenovirus WIV11		Complete Genome
GCF_001722965.1_ViralProj341707_genomic.fna	GCF_001722965.1	1788434	2015374	Bat mastadenovirus WIV12		Complete Genome
GCF_001722705.1_ViralProj342445_genomic.fna	GCF_001722705.1	1788435	2015375	Bat mastadenovirus WIV13		Complete Genome
GCF_002158575.1_ViralProj387742_genomic.fna	GCF_002158575.1	1986505	2015376	Bat mastadenovirus WIV17		Complete Genome
GCF_001629825.1_ViralProj318899_genomic.fna	GCF_001629825.1	1788436	2015370	Bat mastadenovirus WIV9		Complete Genome
GCF_000925295.1_ViralProj263908_genomic.fna	GCF_000925295.1	1112631	1979178	Bat Paramyxovirus Eid_hel
GCF_000893855.1_ViralProj72391_genomic.fna	GCF_000893855.1	1074863	1074863	Bat picornavirus 1	strain=NC16A	Complete Genome
GCF_000891335.1_ViralProj72393_genomic.fna	GCF_000891335.1	1074864	1074864	Bat picornavirus 2	strain=MH9F	Complete Genome
GCF_000892935.1_ViralProj72379_genomic.fna	GCF_000892935.1	1074865	1074865	Bat picornavirus 3	strain=TLC5F	Complete Genome
GCF_000969095.1_ViralProj280306_genomic.fna	GCF_000969095.1	1623687	1891721	Bat polyomavirus 5a		Complete Genome
GCF_000968995.1_ViralProj280292_genomic.fna	GCF_000968995.1	1623684	1891717	Bat polyomavirus 5b		Complete Genome
GCF_000970605.1_ViralProj279594_genomic.fna	GCF_000970605.1	1623685	1891757	Bat polyomavirus 6a		Complete Genome
GCF_000969215.1_ViralProj280304_genomic.fna	GCF_000969215.1	1623689	1891759	Bat polyomavirus 6b		Complete Genome
GCF_000969035.1_ViralProj280305_genomic.fna	GCF_000969035.1	1623688	1891760	Bat polyomavirus 6c		Complete Genome
GCF_000969155.1_ViralProj280307_genomic.fna	GCF_000969155.1	1623686	1623686	Bat polyomavirus 6d		Complete Genome
GCF_002008535.1_ViralProj376916_genomic.fna	GCF_002008535.1	1958777	1958777	Bat sapelovirus		Complete Genome
GCF_002005625.1_ViralProj376036_genomic.fna	GCF_002005625.1	1959930	1959930	Bat sapovirus
GCF_000894635.1_ViralProj167111_genomic.fna	GCF_000894635.1	1185359	1185359	Bat sapovirus TLC58
GCF_001717375.1_ViralProj340456_genomic.fna	GCF_001717375.1	1888311	1888311	Bat tymo-like virus	strain=UW1	Complete Genome
GCF_002220235.1_ASM222023v1_genomic.fna	GCF_002220235.1	41875	41875	Bathycoccus prasinos	strain=RCC 1105	Chromosome
GCF_000889515.1_ViralProj61009_genomic.fna	GCF_000889515.1	880159	933845	Bathycoccus sp. RCC1105 virus BpV1		Complete Genome
GCF_000013185.1_ASM1318v1_genomic.fna	GCF_000013185.1	374463	186490	Baumannia cicadellinicola str. Hc (Homalodisca coagulata)	strain=Hc (Homalodisca coagulata)	Complete Genome
GCF_000691605.1_ASM69160v1_genomic.fna	GCF_000691605.1	959	959	Bdellovibrio bacteriovorus	strain=109J	Complete Genome
GCF_000196175.1_ASM19617v1_genomic.fna	GCF_000196175.1	264462	959	Bdellovibrio bacteriovorus HD100	strain=HD100	Complete Genome
GCF_000317895.1_ASM31789v1_genomic.fna	GCF_000317895.1	1069642	959	Bdellovibrio bacteriovorus str. Tiberius	strain=Tiberius	Complete Genome
GCF_000525675.1_ASM52567v1_genomic.fna	GCF_000525675.1	765869	959	Bdellovibrio bacteriovorus W	strain=W	Complete Genome
GCF_000348725.1_ASM34872v1_genomic.fna	GCF_000348725.1	1184267	453816	Bdellovibrio exovorus JSS	strain=JSS	Complete Genome
GCF_000892195.1_ViralProj68417_genomic.fna	GCF_000892195.1	1035662	1035662	Bdellovibrio phage phi1402		Complete Genome
GCF_000903295.1_ViralProj181215_genomic.fna	GCF_000903295.1	1127515	1127515	Bdellovibrio phage phi1422		Complete Genome
GCF_000838865.1_ViralProj14107_genomic.fna	GCF_000838865.1	145579	1986027	Bdellovibrio phage phiMH2K		Complete Genome
GCF_000843965.1_ViralProj14453_genomic.fna	GCF_000843965.1	77856	77856	Beak and feather disease virus		Complete Genome
GCF_001907825.1_ViralProj357638_genomic.fna	GCF_001907825.1	67082	67082	BeAn 58058 virus	strain=BeAn58058	Complete Genome
GCF_000840005.1_ViralMultiSegProj14165_genomic.fna	GCF_000840005.1	31602	31602	Bean calico mosaic virus		Complete Genome
GCF_000902035.1_ViralMultiSegProj182753_genomic.fna	GCF_000902035.1	1227354	1227354	Bean chlorosis virus		Complete Genome
GCF_000910695.1_ViralMultiSegProj214690_genomic.fna	GCF_000910695.1	1227355	1227355	Bean chlorotic mosaic virus		Complete Genome
GCF_000861385.1_ViralProj15333_genomic.fna	GCF_000861385.1	43240	43240	Bean common mosaic necrosis virus	strain=NL-3 (necrotic)	Complete Genome
GCF_000857245.1_ViralProj15183_genomic.fna	GCF_000857245.1	12196	12196	Bean common mosaic virus	strain=blackeye cowpea mosaic	Complete Genome
GCF_000838545.1_ViralMultiSegProj14037_genomic.fna	GCF_000838545.1	10838	10838	Bean dwarf mosaic virus		Complete Genome
GCF_000841845.1_ViralMultiSegProj14199_genomic.fna	GCF_000841845.1	10839	10839	Bean golden mosaic virus	strain=Type I	Complete Genome
GCF_000840225.1_ViralMultiSegProj14200_genomic.fna	GCF_000840225.1	220340	220340	Bean golden yellow mosaic virus		Complete Genome
GCF_000850345.1_ViralProj14734_genomic.fna	GCF_000850345.1	12041	12041	Bean leafroll virus		Complete Genome
GCF_000897275.1_ViralMultiSegProj168523_genomic.fna	GCF_000897275.1	1033976	1033976	Bean necrotic mosaic virus		Complete Genome
GCF_000862925.1_ViralMultiSegProj15294_genomic.fna	GCF_000862925.1	12260	12260	Bean pod mottle virus	strain=KY G-7	Complete Genome
GCF_001430295.1_ViralMultiSegProj300795_genomic.fna	GCF_001430295.1	128790	128790	Bean rugose mosaic virus		Complete Genome
GCF_000875065.1_ViralMultiSegProj29237_genomic.fna	GCF_000875065.1	267970	267970	Bean yellow disorder virus		Complete Genome
GCF_000849725.1_ViralProj14605_genomic.fna	GCF_000849725.1	57119	57119	Bean yellow dwarf virus		Complete Genome
GCF_000893575.1_ViralProj66545_genomic.fna	GCF_000893575.1	714310	714310	Bean yellow mosaic Mexico virus	strain=06.05.11	Complete Genome
GCF_000863145.1_ViralProj15339_genomic.fna	GCF_000863145.1	12197	12197	Bean yellow mosaic virus	strain=MB4	Complete Genome
GCF_000874845.1_ViralMultiSegProj28325_genomic.fna	GCF_000874845.1	192848	192848	Bear Canyon mammarenavirus	strain=AV A0070039	Complete Genome
GCF_001045385.1_ViralProj288497_genomic.fna	GCF_001045385.1	1670662	1670662	Bearded dragon parvovirus	strain=2014	Complete Genome
GCF_001045305.1_ViralProj288325_genomic.fna	GCF_001045305.1	1549357	1549357	Beauveria bassiana non-segmented virus 1		Complete Genome
GCF_002080235.1_ViralMultiSegProj381653_genomic.fna	GCF_002080235.1	1740646	1740646	Beauveria bassiana polymycovirus 1		Complete Genome
GCF_000922795.1_ViralProj248746_genomic.fna	GCF_000922795.1	1485922	1485922	Beauveria bassiana victorivirus NZL
GCF_000894395.1_ViralProj88121_genomic.fna	GCF_000894395.1	59305	59305	Bebaru virus		Complete Genome
GCF_001190355.1_ViralProj291249_genomic.fna	GCF_001190355.1	1682186	1682186	Bee Macula-like virus		Complete Genome
GCF_000855285.1_ViralProj14949_genomic.fna	GCF_000855285.1	196375	196375	Beet black scorch virus		Complete Genome
GCF_000849805.1_ViralProj14623_genomic.fna	GCF_000849805.1	298965	298965	Beet black scorch virus satellite RNA		Complete Genome
GCF_000847745.1_ViralProj14712_genomic.fna	GCF_000847745.1	131082	131082	Beet chlorosis virus		Complete Genome
GCF_000883355.1_ViralMultiSegProj32709_genomic.fna	GCF_000883355.1	509923	509923	Beet cryptic virus 1		Complete Genome
GCF_000879795.1_ViralProj28973_genomic.fna	GCF_000879795.1	391228	391228	Beet curly top Iran virus	strain=K	Complete Genome
GCF_000843505.1_ViralProj14366_genomic.fna	GCF_000843505.1	10840	10840	Beet curly top virus		Complete Genome
GCF_000857745.1_ViralProj15079_genomic.fna	GCF_000857745.1	156690	156690	Beet mild yellowing virus		Complete Genome
GCF_000854465.1_ViralProj14942_genomic.fna	GCF_000854465.1	114921	114921	Beet mosaic virus		Complete Genome
GCF_000854885.1_ViralMultiSegProj15033_genomic.fna	GCF_000854885.1	31721	31721	Beet necrotic yellow vein virus		Complete Genome
GCF_000853445.1_ViralMultiSegProj14901_genomic.fna	GCF_000853445.1	72750	72750	Beet pseudoyellows virus		Complete Genome
GCF_000860405.1_ViralMultiSegProj15287_genomic.fna	GCF_000860405.1	191547	191547	Beet ringspot virus	strain=S	Complete Genome
GCF_000850425.1_ViralMultiSegProj14750_genomic.fna	GCF_000850425.1	76343	76343	Beet soil-borne mosaic virus	strain=EA	Complete Genome
GCF_000851945.1_ViralMultiSegProj14751_genomic.fna	GCF_000851945.1	46436	46436	Beet soil-borne virus		Complete Genome
GCF_000855145.1_ViralMultiSegProj15091_genomic.fna	GCF_000855145.1	71972	71972	Beet virus Q		Complete Genome
GCF_000851905.1_ViralProj14910_genomic.fna	GCF_000851905.1	198589	198589	Beet western yellows ST9 associated virus	strain=ST9	Complete Genome
GCF_000852565.1_ViralProj14885_genomic.fna	GCF_000852565.1	12042	12042	Beet western yellows virus	strain=USA	Complete Genome
GCF_000860605.1_ViralProj15328_genomic.fna	GCF_000860605.1	12161	12161	Beet yellows virus		Complete Genome
GCF_001305575.2_ASM130557v2_genomic.fna	GCF_001305575.2	319938	319938	Beggiatoa leptomitiformis	strain=D-402	Complete Genome
GCF_000858105.1_ViralProj15161_genomic.fna	GCF_000858105.1	302069	302069	Begomovirus-associated DNA-II		Complete Genome
GCF_000857145.1_ViralProj15162_genomic.fna	GCF_000857145.1	302070	302070	Begomovirus-associated DNA-III		Complete Genome
GCF_001925395.1_ViralProj359245_genomic.fna	GCF_001925395.1	1922352	1922352	Beihai anemone virus 1	strain=BHHK129576	Complete Genome
GCF_001925295.1_ViralProj359244_genomic.fna	GCF_001925295.1	1922353	1922353	Beihai astro-like virus	strain=BHWZXX13371	Complete Genome
GCF_001925435.1_ViralProj359243_genomic.fna	GCF_001925435.1	1922354	1922354	Beihai barnacle virus 10	strain=BHTH18714	Complete Genome
GCF_001926775.1_ViralMultiSegProj359242_genomic.fna	GCF_001926775.1	1922355	1922355	Beihai barnacle virus 11	strain=BHTH10280	Complete Genome
GCF_001925375.1_ViralMultiSegProj359241_genomic.fna	GCF_001925375.1	1922356	1922356	Beihai barnacle virus 12	strain=BHTH16091	Complete Genome
GCF_001921375.1_ViralMultiSegProj358541_genomic.fna	GCF_001921375.1	1922357	1922357	Beihai barnacle virus 13	strain=BHTH16173	Complete Genome
GCF_001925275.1_ViralProj359240_genomic.fna	GCF_001925275.1	1922359	1922359	Beihai barnacle virus 15	strain=BHTH16139	Complete Genome
GCF_001925415.1_ViralProj359239_genomic.fna	GCF_001925415.1	1922360	1922360	Beihai barnacle virus 2	strain=BHTH16123	Complete Genome
GCF_001926755.1_ViralProj359238_genomic.fna	GCF_001926755.1	1922361	1922361	Beihai barnacle virus 3	strain=BHTH16145	Complete Genome
GCF_001925715.1_ViralProj359284_genomic.fna	GCF_001925715.1	1922362	1922362	Beihai barnacle virus 4	strain=BHTH16136	Complete Genome
GCF_001926475.1_ViralProj359283_genomic.fna	GCF_001926475.1	1922365	1922365	Beihai barnacle virus 7	strain=BHTH16013	Complete Genome
GCF_001926975.1_ViralProj359282_genomic.fna	GCF_001926975.1	1922366	1922366	Beihai barnacle virus 8	strain=BHTH14652	Complete Genome
GCF_001926135.1_ViralProj359281_genomic.fna	GCF_001926135.1	1922367	1922367	Beihai barnacle virus 9	strain=BHTH10927	Complete Genome
GCF_001443865.1_ViralProj302019_genomic.fna	GCF_001443865.1	1746057	1746057	Beihai barnacle viurs 1	strain=BHGZ	Complete Genome
GCF_001925695.1_ViralProj359280_genomic.fna	GCF_001925695.1	1922368	1922368	Beihai blue swimmer crab virus 1	strain=YYSZX13554	Complete Genome
GCF_001926455.1_ViralProj359279_genomic.fna	GCF_001926455.1	1922370	1922370	Beihai blue swimmer crab virus 3	strain=YYSZX17757	Complete Genome
GCF_001926955.1_ViralProj359278_genomic.fna	GCF_001926955.1	1922376	1922376	Beihai charybdis crab virus 1	strain=BHXun33339	Complete Genome
GCF_001926435.1_ViralProj359275_genomic.fna	GCF_001926435.1	1922379	1922379	Beihai echinoderm virus 1	strain=BHJP42036	Complete Genome
GCF_001926935.1_ViralProj359274_genomic.fna	GCF_001926935.1	1922381	1922381	Beihai hepe-like virus 10	strain=BHZY60406	Complete Genome
GCF_001921475.1_ViralProj358540_genomic.fna	GCF_001921475.1	1922387	1922387	Beihai hepe-like virus 4	strain=BHZY60842	Complete Genome
GCF_001926095.1_ViralProj359273_genomic.fna	GCF_001926095.1	1922385	1922385	Beihai hepe-like virus 8	strain=BHZY60925	Complete Genome
GCF_001925655.1_ViralProj359272_genomic.fna	GCF_001925655.1	1922386	1922386	Beihai hepe-like virus 9	strain=HOU157038	Complete Genome
GCF_001926415.1_ViralProj359271_genomic.fna	GCF_001926415.1	1922388	1922388	Beihai hermit crab virus 1	strain=BHWZXX15637	Complete Genome
GCF_001926915.1_ViralProj359270_genomic.fna	GCF_001926915.1	1922390	1922390	Beihai hermit crab virus 3	strain=BHJJX21702	Complete Genome
GCF_001926075.1_ViralProj359269_genomic.fna	GCF_001926075.1	1922391	1922391	Beihai hermit crab virus 4	strain=BHJJX25971	Complete Genome
GCF_001925635.1_ViralMultiSegProj359268_genomic.fna	GCF_001925635.1	1922392	1922392	Beihai horseshoe crab virus 1	strain=HOU157708	Complete Genome
GCF_001925555.1_ViralProj359267_genomic.fna	GCF_001925555.1	1922393	1922393	Beihai hypo-like virus 1	strain=BHZC36965	Complete Genome
GCF_001926895.1_ViralProj359266_genomic.fna	GCF_001926895.1	1922428	1922428	Beihai mantis shrimp virus 1	strain=BHXG26050	Complete Genome
GCF_001926055.1_ViralProj359265_genomic.fna	GCF_001926055.1	1922429	1922429	Beihai mantis shrimp virus 2	strain=BHXG46195	Complete Genome
GCF_001925615.1_ViralProj359264_genomic.fna	GCF_001925615.1	1922430	1922430	Beihai mantis shrimp virus 3	strain=BHXG26678	Complete Genome
GCF_001925535.1_ViralProj359263_genomic.fna	GCF_001925535.1	1922431	1922431	Beihai mantis shrimp virus 4	strain=BHXG23944	Complete Genome
GCF_001926875.1_ViralProj359262_genomic.fna	GCF_001926875.1	1922432	1922432	Beihai mantis shrimp virus 5	strain=BHXG25299	Complete Genome
GCF_001926035.1_ViralMultiSegProj359261_genomic.fna	GCF_001926035.1	1922433	1922433	Beihai mantis shrimp virus 6	strain=BHXG24422	Complete Genome
GCF_001921455.1_ViralProj358557_genomic.fna	GCF_001921455.1	1922434	1922434	Beihai mollusks virus 1	strain=WZSLuoI86140	Complete Genome
GCF_001925595.1_ViralProj359260_genomic.fna	GCF_001925595.1	1922435	1922435	Beihai mollusks virus 2	strain=WZSLuoI86113	Complete Genome
GCF_001925515.1_ViralProj359259_genomic.fna	GCF_001925515.1	1922436	1922436	Beihai narna-like virus 1	strain=BWBFG61141	Complete Genome
GCF_001926855.1_ViralProj359258_genomic.fna	GCF_001926855.1	1922437	1922437	Beihai narna-like virus 10	strain=BHZY60512	Complete Genome
GCF_001926015.1_ViralProj359257_genomic.fna	GCF_001926015.1	1922438	1922438	Beihai narna-like virus 11	strain=BWBFG39775	Complete Genome
GCF_001925575.1_ViralProj359256_genomic.fna	GCF_001925575.1	1922439	1922439	Beihai narna-like virus 12	strain=BHZC35702	Complete Genome
GCF_001925495.1_ViralProj359255_genomic.fna	GCF_001925495.1	1922440	1922440	Beihai narna-like virus 13	strain=BHWZXX14912	Complete Genome
GCF_001926295.1_ViralProj359313_genomic.fna	GCF_001926295.1	1922441	1922441	Beihai narna-like virus 14	strain=BHJP52694	Complete Genome
GCF_001925855.1_ViralProj359312_genomic.fna	GCF_001925855.1	1922442	1922442	Beihai narna-like virus 15	strain=BHHZL10358	Complete Genome
GCF_001926615.1_ViralProj359311_genomic.fna	GCF_001926615.1	1922443	1922443	Beihai narna-like virus 16	strain=BHJP26864	Complete Genome
GCF_001927115.1_ViralProj359310_genomic.fna	GCF_001927115.1	1922444	1922444	Beihai narna-like virus 17	strain=SCJXSX39297	Complete Genome
GCF_001926275.1_ViralProj359309_genomic.fna	GCF_001926275.1	1922445	1922445	Beihai narna-like virus 18	strain=HOU157597	Complete Genome
GCF_001925835.1_ViralProj359308_genomic.fna	GCF_001925835.1	1922446	1922446	Beihai narna-like virus 19	strain=BHNXC41285	Complete Genome
GCF_001926595.1_ViralProj359307_genomic.fna	GCF_001926595.1	1922447	1922447	Beihai narna-like virus 2	strain=BHZY58217	Complete Genome
GCF_001927095.1_ViralProj359306_genomic.fna	GCF_001927095.1	1922448	1922448	Beihai narna-like virus 20	strain=BWBFG40664	Complete Genome
GCF_001926255.1_ViralProj359305_genomic.fna	GCF_001926255.1	1922449	1922449	Beihai narna-like virus 21	strain=SCJXSX34167	Complete Genome
GCF_001925355.1_ViralProj359215_genomic.fna	GCF_001925355.1	1922450	1922450	Beihai narna-like virus 22	strain=BHBJDX18651	Complete Genome
GCF_001925815.1_ViralProj359304_genomic.fna	GCF_001925815.1	1922451	1922451	Beihai narna-like virus 23	strain=BHZY57139	Complete Genome
GCF_001926575.1_ViralProj359303_genomic.fna	GCF_001926575.1	1922452	1922452	Beihai narna-like virus 24	strain=BHXG26712	Complete Genome
GCF_001927075.1_ViralProj359302_genomic.fna	GCF_001927075.1	1922454	1922454	Beihai narna-like virus 26	strain=BHHQ66335	Complete Genome
GCF_001926235.1_ViralProj359301_genomic.fna	GCF_001926235.1	1922455	1922455	Beihai narna-like virus 3	strain=BHBJDX18174	Complete Genome
GCF_001925795.1_ViralProj359300_genomic.fna	GCF_001925795.1	1922456	1922456	Beihai narna-like virus 4	strain=BHZY53599	Complete Genome
GCF_001926555.1_ViralProj359299_genomic.fna	GCF_001926555.1	1922458	1922458	Beihai narna-like virus 6	strain=BHZC37402	Complete Genome
GCF_001927055.1_ViralProj359298_genomic.fna	GCF_001927055.1	1922460	1922460	Beihai narna-like virus 8	strain=BHZY59840	Complete Genome
GCF_001926215.1_ViralProj359297_genomic.fna	GCF_001926215.1	1922461	1922461	Beihai narna-like virus 9	strain=HOU146315	Complete Genome
GCF_001925455.1_ViralProj359247_genomic.fna	GCF_001925455.1	1922350	1922350	Beihai Nido-like virus 1	strain=BZL87871	Complete Genome
GCF_001926795.1_ViralProj359246_genomic.fna	GCF_001926795.1	1922351	1922351	Beihai Nido-like virus 2	strain=BHXun32263	Complete Genome
GCF_001925775.1_ViralMultiSegProj359296_genomic.fna	GCF_001925775.1	1922464	1922464	Beihai noda-like virus 11	strain=BHJJX49550	Complete Genome
GCF_001923575.1_ViralProj358596_genomic.fna	GCF_001923575.1	1922471	1922471	Beihai noda-like virus 18	strain=YYSZX13070	Complete Genome
GCF_001924455.1_ViralProj358999_genomic.fna	GCF_001924455.1	1922483	1922483	Beihai noda-like virus 29	strain=BHWZXX15622	Complete Genome
GCF_001924915.1_ViralProj358998_genomic.fna	GCF_001924915.1	1922487	1922487	Beihai noda-like virus 5	strain=HOU157766	Complete Genome
GCF_001926535.1_ViralProj359295_genomic.fna	GCF_001926535.1	1922492	1922492	Beihai octopus virus 1	strain=BHZY180716	Complete Genome
GCF_001927035.1_ViralProj359294_genomic.fna	GCF_001927035.1	1922493	1922493	Beihai octopus virus 2	strain=BHZY60909	Complete Genome
GCF_001926195.1_ViralProj359293_genomic.fna	GCF_001926195.1	1922496	1922496	Beihai paphia shell virus 1	strain=BHZY60696	Complete Genome
GCF_001925755.1_ViralProj359292_genomic.fna	GCF_001925755.1	1922497	1922497	Beihai paphia shell virus 2	strain=YYSZX17625	Complete Genome
GCF_001926515.1_ViralProj359291_genomic.fna	GCF_001926515.1	1922498	1922498	Beihai paphia shell virus 3	strain=BWBFG40853	Complete Genome
GCF_001927015.1_ViralProj359290_genomic.fna	GCF_001927015.1	1922499	1922499	Beihai paphia shell virus 4	strain=BWBFG40859	Complete Genome
GCF_001926175.1_ViralMultiSegProj359289_genomic.fna	GCF_001926175.1	1922504	1922504	Beihai partiti-like virus 2	strain=BHZY60797	Complete Genome
GCF_001921275.1_ViralProj358102_genomic.fna	GCF_001921275.1	1922513	1922513	Beihai permutotetra-like virus 2	strain=HOU234589	Complete Genome
GCF_001925735.1_ViralMultiSegProj359288_genomic.fna	GCF_001925735.1	1922524	1922524	Beihai picobirna-like virus 7	strain=BHNXC57916	Complete Genome
GCF_001926495.1_ViralMultiSegProj359287_genomic.fna	GCF_001926495.1	1922525	1922525	Beihai picobirna-like virus 8	strain=BHNXC71065	Complete Genome
GCF_001935065.1_ViralProj359890_genomic.fna	GCF_001935065.1	1922527	1922527	Beihai picorna-like virus 1	strain=BHZC36988	Complete Genome
GCF_001935705.1_ViralProj359889_genomic.fna	GCF_001935705.1	1922528	1922528	Beihai picorna-like virus 100	strain=BHNXC41148	Complete Genome
GCF_001935285.1_ViralProj359888_genomic.fna	GCF_001935285.1	1922529	1922529	Beihai picorna-like virus 101	strain=BHBJDX18559	Complete Genome
GCF_001935645.1_ViralProj359876_genomic.fna	GCF_001935645.1	1922530	1922530	Beihai picorna-like virus 102	strain=BHZC35144	Complete Genome
GCF_001923535.1_ViralProj358997_genomic.fna	GCF_001923535.1	1922531	1922531	Beihai picorna-like virus 103	strain=BHBei77089	Complete Genome
GCF_001934125.1_ViralProj359875_genomic.fna	GCF_001934125.1	1922532	1922532	Beihai picorna-like virus 104	strain=BHZC37407	Complete Genome
GCF_001934485.1_ViralProj359874_genomic.fna	GCF_001934485.1	1922533	1922533	Beihai picorna-like virus 105	strain=BHHK79817	Complete Genome
GCF_001934985.1_ViralProj359873_genomic.fna	GCF_001934985.1	1922534	1922534	Beihai picorna-like virus 106	strain=BHZY60875	Complete Genome
GCF_001935625.1_ViralProj359872_genomic.fna	GCF_001935625.1	1922535	1922535	Beihai picorna-like virus 107	strain=BHZY60580	Complete Genome
GCF_001934105.1_ViralProj359871_genomic.fna	GCF_001934105.1	1922536	1922536	Beihai picorna-like virus 108	strain=BHTH16067	Complete Genome
GCF_001934465.1_ViralProj359870_genomic.fna	GCF_001934465.1	1922538	1922538	Beihai picorna-like virus 11	strain=BHZY60905	Complete Genome
GCF_001934965.1_ViralProj359869_genomic.fna	GCF_001934965.1	1922539	1922539	Beihai picorna-like virus 110	strain=BHXG26677	Complete Genome
GCF_001934905.1_ViralProj359868_genomic.fna	GCF_001934905.1	1922540	1922540	Beihai picorna-like virus 111	strain=BHBei77071	Complete Genome
GCF_001934085.1_ViralProj359867_genomic.fna	GCF_001934085.1	1922541	1922541	Beihai picorna-like virus 112	strain=BHXG26692	Complete Genome
GCF_001934445.1_ViralProj359866_genomic.fna	GCF_001934445.1	1922542	1922542	Beihai picorna-like virus 113	strain=BHXG26415	Complete Genome
GCF_001934945.1_ViralProj359865_genomic.fna	GCF_001934945.1	1922543	1922543	Beihai picorna-like virus 114	strain=BHZY60932	Complete Genome
GCF_001934885.1_ViralProj359864_genomic.fna	GCF_001934885.1	1922544	1922544	Beihai picorna-like virus 115	strain=BHHK131520	Complete Genome
GCF_001934065.1_ViralProj359863_genomic.fna	GCF_001934065.1	1922545	1922545	Beihai picorna-like virus 116	strain=YYSZX16386	Complete Genome
GCF_001934425.1_ViralProj359862_genomic.fna	GCF_001934425.1	1922546	1922546	Beihai picorna-like virus 117	strain=BHJP63029	Complete Genome
GCF_001934925.1_ViralProj359861_genomic.fna	GCF_001934925.1	1922547	1922547	Beihai picorna-like virus 118	strain=BHHK118641	Complete Genome
GCF_001934865.1_ViralProj359860_genomic.fna	GCF_001934865.1	1922548	1922548	Beihai picorna-like virus 119	strain=BHJP60437	Complete Genome
GCF_001934045.1_ViralProj359859_genomic.fna	GCF_001934045.1	1922549	1922549	Beihai picorna-like virus 120	strain=BHSC167783	Complete Genome
GCF_001934405.1_ViralProj359858_genomic.fna	GCF_001934405.1	1922550	1922550	Beihai picorna-like virus 121	strain=BHHZL10364	Complete Genome
GCF_001933765.1_ViralProj359857_genomic.fna	GCF_001933765.1	1922551	1922551	Beihai picorna-like virus 122	strain=BHZY60922	Complete Genome
GCF_001934845.1_ViralProj359856_genomic.fna	GCF_001934845.1	1922552	1922552	Beihai picorna-like virus 123	strain=BHCL81476	Complete Genome
GCF_001934025.1_ViralProj359855_genomic.fna	GCF_001934025.1	1922553	1922553	Beihai picorna-like virus 124	strain=BHBJDX18598	Complete Genome
GCF_001934385.1_ViralProj359854_genomic.fna	GCF_001934385.1	1922554	1922554	Beihai picorna-like virus 125	strain=BHZY54174	Complete Genome
GCF_001933745.1_ViralProj359853_genomic.fna	GCF_001933745.1	1922556	1922556	Beihai picorna-like virus 14	strain=BHHK130444	Complete Genome
GCF_001923995.1_ViralProj358996_genomic.fna	GCF_001923995.1	1922557	1922557	Beihai picorna-like virus 15	strain=BHZY59344	Complete Genome
GCF_001934825.1_ViralProj359852_genomic.fna	GCF_001934825.1	1922558	1922558	Beihai picorna-like virus 16	strain=BHHK123579	Complete Genome
GCF_001934005.1_ViralProj359851_genomic.fna	GCF_001934005.1	1922559	1922559	Beihai picorna-like virus 17	strain=BHZY55665	Complete Genome
GCF_001934365.1_ViralProj359850_genomic.fna	GCF_001934365.1	1922560	1922560	Beihai picorna-like virus 18	strain=BHSC157282	Complete Genome
GCF_001933725.1_ViralProj359849_genomic.fna	GCF_001933725.1	1922561	1922561	Beihai picorna-like virus 19	strain=BHJJX24523	Complete Genome
GCF_001934805.1_ViralProj359848_genomic.fna	GCF_001934805.1	1922562	1922562	Beihai picorna-like virus 2	strain=BHNXC40556	Complete Genome
GCF_001933985.1_ViralProj359847_genomic.fna	GCF_001933985.1	1922563	1922563	Beihai picorna-like virus 20	strain=BHJJX25607	Complete Genome
GCF_001935825.1_ViralProj359913_genomic.fna	GCF_001935825.1	1922564	1922564	Beihai picorna-like virus 21	strain=BHZY60822	Complete Genome
GCF_001935405.1_ViralProj359912_genomic.fna	GCF_001935405.1	1922566	1922566	Beihai picorna-like virus 23	strain=YYSZX17154	Complete Genome
GCF_001935545.1_ViralProj359911_genomic.fna	GCF_001935545.1	1922567	1922567	Beihai picorna-like virus 24	strain=BHZY60459	Complete Genome
GCF_002149785.1_ViralProj359363_genomic.fna	GCF_002149785.1	1922569	1922569	Beihai picorna-like virus 26	strain=BZL93356	Complete Genome
GCF_001935165.1_ViralProj359910_genomic.fna	GCF_001935165.1	1922570	1922570	Beihai picorna-like virus 27	strain=BHNXC41439	Complete Genome
GCF_001935805.1_ViralProj359909_genomic.fna	GCF_001935805.1	1922571	1922571	Beihai picorna-like virus 28	strain=BHZY60695	Complete Genome
GCF_001935385.1_ViralProj359908_genomic.fna	GCF_001935385.1	1922573	1922573	Beihai picorna-like virus 30	strain=BHNXC41477	Complete Genome
GCF_001935525.1_ViralProj359907_genomic.fna	GCF_001935525.1	1922575	1922575	Beihai picorna-like virus 32	strain=BHNXC41402	Complete Genome
GCF_001935145.1_ViralProj359906_genomic.fna	GCF_001935145.1	1922576	1922576	Beihai picorna-like virus 33	strain=BWBFG40845	Complete Genome
GCF_001924435.1_ViralProj358995_genomic.fna	GCF_001924435.1	1922578	1922578	Beihai picorna-like virus 35	strain=BHZC37213	Complete Genome
GCF_001935785.1_ViralProj359905_genomic.fna	GCF_001935785.1	1922582	1922582	Beihai picorna-like virus 39	strain=BHSC164089	Complete Genome
GCF_001935365.1_ViralProj359904_genomic.fna	GCF_001935365.1	1922583	1922583	Beihai picorna-like virus 4	strain=BHZY60671	Complete Genome
GCF_001935505.1_ViralProj359903_genomic.fna	GCF_001935505.1	1922584	1922584	Beihai picorna-like virus 40	strain=BHNXC39087	Complete Genome
GCF_001935125.1_ViralProj359902_genomic.fna	GCF_001935125.1	1922585	1922585	Beihai picorna-like virus 41	strain=BHJJX25957	Complete Genome
GCF_001935765.1_ViralProj359901_genomic.fna	GCF_001935765.1	1922586	1922586	Beihai picorna-like virus 42	strain=SCJXSX39263	Complete Genome
GCF_001924895.1_ViralProj358994_genomic.fna	GCF_001924895.1	1922587	1922587	Beihai picorna-like virus 43	strain=BHNXC41212	Complete Genome
GCF_001935345.1_ViralProj359900_genomic.fna	GCF_001935345.1	1922588	1922588	Beihai picorna-like virus 44	strain=BHXG26143	Complete Genome
GCF_001935485.1_ViralProj359899_genomic.fna	GCF_001935485.1	1922589	1922589	Beihai picorna-like virus 45	strain=BHZC37433	Complete Genome
GCF_001935105.1_ViralProj359898_genomic.fna	GCF_001935105.1	1922590	1922590	Beihai picorna-like virus 46	strain=BHZC37388	Complete Genome
GCF_001935745.1_ViralProj359897_genomic.fna	GCF_001935745.1	1922591	1922591	Beihai picorna-like virus 47	strain=SCJXSX39359	Complete Genome
GCF_001935325.1_ViralProj359896_genomic.fna	GCF_001935325.1	1922592	1922592	Beihai picorna-like virus 48	strain=BHZC37443	Complete Genome
GCF_001934585.1_ViralProj359895_genomic.fna	GCF_001934585.1	1922593	1922593	Beihai picorna-like virus 49	strain=BHZC36855	Complete Genome
GCF_001923555.1_ViralProj358206_genomic.fna	GCF_001923555.1	1922594	1922594	Beihai picorna-like virus 5	strain=BHNXC41415	Complete Genome
GCF_001934545.1_ViralProj359886_genomic.fna	GCF_001934545.1	1922595	1922595	Beihai picorna-like virus 50	strain=BHZC37234	Complete Genome
GCF_001935045.1_ViralProj359885_genomic.fna	GCF_001935045.1	1922596	1922596	Beihai picorna-like virus 51	strain=SCJXSX38939	Complete Genome
GCF_001935685.1_ViralProj359884_genomic.fna	GCF_001935685.1	1922597	1922597	Beihai picorna-like virus 52	strain=BHNXC41485	Complete Genome
GCF_001923515.1_ViralProj358993_genomic.fna	GCF_001923515.1	1922598	1922598	Beihai picorna-like virus 53	strain=BHNXC41443	Complete Genome
GCF_001935265.1_ViralProj359883_genomic.fna	GCF_001935265.1	1922599	1922599	Beihai picorna-like virus 54	strain=BHNXC41489	Complete Genome
GCF_001934525.1_ViralProj359882_genomic.fna	GCF_001934525.1	1922600	1922600	Beihai picorna-like virus 55	strain=BHBei68636	Complete Genome
GCF_001935025.1_ViralProj359881_genomic.fna	GCF_001935025.1	1922601	1922601	Beihai picorna-like virus 56	strain=BWBFG40791	Complete Genome
GCF_002008835.1_ViralProj376928_genomic.fna	GCF_002008835.1	1922602	1922602	Beihai picorna-like virus 57	strain=BHHQ57630	Complete Genome
GCF_001935665.1_ViralProj359880_genomic.fna	GCF_001935665.1	1922603	1922603	Beihai picorna-like virus 58	strain=BHBei77093	Complete Genome
GCF_002008475.1_ViralProj376927_genomic.fna	GCF_002008475.1	1922604	1922604	Beihai picorna-like virus 59	strain=BHBei77099	Complete Genome
GCF_001934145.1_ViralProj359879_genomic.fna	GCF_001934145.1	1922605	1922605	Beihai picorna-like virus 6	strain=BHNXC41284	Complete Genome
GCF_001934505.1_ViralProj359878_genomic.fna	GCF_001934505.1	1922606	1922606	Beihai picorna-like virus 60	strain=BHBei55726	Complete Genome
GCF_001935005.1_ViralProj359877_genomic.fna	GCF_001935005.1	1922607	1922607	Beihai picorna-like virus 61	strain=BHBei76813	Complete Genome
GCF_001923975.1_ViralProj358992_genomic.fna	GCF_001923975.1	1922608	1922608	Beihai picorna-like virus 62	strain=BHBei74566	Complete Genome
GCF_001934345.1_ViralProj359846_genomic.fna	GCF_001934345.1	1922609	1922609	Beihai picorna-like virus 63	strain=BHTSS17878	Complete Genome
GCF_001933705.1_ViralProj359845_genomic.fna	GCF_001933705.1	1922610	1922610	Beihai picorna-like virus 64	strain=BHJP54755	Complete Genome
GCF_001934785.1_ViralProj359844_genomic.fna	GCF_001934785.1	1922611	1922611	Beihai picorna-like virus 65	strain=BHZY60937	Complete Genome
GCF_001933965.1_ViralProj359843_genomic.fna	GCF_001933965.1	1922612	1922612	Beihai picorna-like virus 66	strain=BHHQ76843	Complete Genome
GCF_001934325.1_ViralProj359842_genomic.fna	GCF_001934325.1	1922613	1922613	Beihai picorna-like virus 67	strain=BHZY60873	Complete Genome
GCF_001933685.1_ViralProj359841_genomic.fna	GCF_001933685.1	1922614	1922614	Beihai picorna-like virus 68	strain=HOU158652	Complete Genome
GCF_001934765.1_ViralProj359840_genomic.fna	GCF_001934765.1	1922615	1922615	Beihai picorna-like virus 69	strain=HOU158647	Complete Genome
GCF_001933945.1_ViralProj359839_genomic.fna	GCF_001933945.1	1922616	1922616	Beihai picorna-like virus 7	strain=BHNXC41478	Complete Genome
GCF_001924415.1_ViralProj358991_genomic.fna	GCF_001924415.1	1922617	1922617	Beihai picorna-like virus 70	strain=BHJJX25952	Complete Genome
GCF_001934305.1_ViralProj359838_genomic.fna	GCF_001934305.1	1922618	1922618	Beihai picorna-like virus 71	strain=BHXG26494	Complete Genome
GCF_001933665.1_ViralProj359837_genomic.fna	GCF_001933665.1	1922619	1922619	Beihai picorna-like virus 72	strain=BHHK126587	Complete Genome
GCF_001924875.1_ViralProj358990_genomic.fna	GCF_001924875.1	1922620	1922620	Beihai picorna-like virus 73	strain=BHTH16077	Complete Genome
GCF_001934745.1_ViralProj359836_genomic.fna	GCF_001934745.1	1922621	1922621	Beihai picorna-like virus 74	strain=BHHK130969	Complete Genome
GCF_001933925.1_ViralProj359835_genomic.fna	GCF_001933925.1	1922622	1922622	Beihai picorna-like virus 75	strain=BHJP52955	Complete Genome
GCF_001934285.1_ViralProj359834_genomic.fna	GCF_001934285.1	1922624	1922624	Beihai picorna-like virus 77	strain=BHBei75652	Complete Genome
GCF_001933645.1_ViralProj359833_genomic.fna	GCF_001933645.1	1922626	1922626	Beihai picorna-like virus 79	strain=BHBJDX18844	Complete Genome
GCF_001934725.1_ViralProj359832_genomic.fna	GCF_001934725.1	1922627	1922627	Beihai picorna-like virus 8	strain=BHNXC41454	Complete Genome
GCF_001933905.1_ViralProj359831_genomic.fna	GCF_001933905.1	1922628	1922628	Beihai picorna-like virus 80	strain=BHZC36213	Complete Genome
GCF_001934265.1_ViralProj359830_genomic.fna	GCF_001934265.1	1922629	1922629	Beihai picorna-like virus 81	strain=HOU149705	Complete Genome
GCF_001933625.1_ViralProj359829_genomic.fna	GCF_001933625.1	1922630	1922630	Beihai picorna-like virus 82	strain=YYSZX17728	Complete Genome
GCF_001934705.1_ViralProj359828_genomic.fna	GCF_001934705.1	1922631	1922631	Beihai picorna-like virus 83	strain=BHWZXX15514	Complete Genome
GCF_001933885.1_ViralProj359827_genomic.fna	GCF_001933885.1	1922632	1922632	Beihai picorna-like virus 84	strain=BHTH16053	Complete Genome
GCF_001934245.1_ViralProj359826_genomic.fna	GCF_001934245.1	1922633	1922633	Beihai picorna-like virus 85	strain=BHHK129719	Complete Genome
GCF_001933605.1_ViralProj359825_genomic.fna	GCF_001933605.1	1922634	1922634	Beihai picorna-like virus 87	strain=BHJJX25970	Complete Genome
GCF_001934685.1_ViralProj359824_genomic.fna	GCF_001934685.1	1922636	1922636	Beihai picorna-like virus 9	strain=BHBJDX18814	Complete Genome
GCF_001933865.1_ViralProj359823_genomic.fna	GCF_001933865.1	1922637	1922637	Beihai picorna-like virus 90	strain=BHWZXX14572	Complete Genome
GCF_001934225.1_ViralProj359822_genomic.fna	GCF_001934225.1	1922638	1922638	Beihai picorna-like virus 91	strain=BHJJX25930	Complete Genome
GCF_001933585.1_ViralProj359821_genomic.fna	GCF_001933585.1	1922639	1922639	Beihai picorna-like virus 93	strain=BHBJDX18546	Complete Genome
GCF_001935085.1_ViralProj359894_genomic.fna	GCF_001935085.1	1922641	1922641	Beihai picorna-like virus 96	strain=HOU158314	Complete Genome
GCF_001935725.1_ViralProj359893_genomic.fna	GCF_001935725.1	1922644	1922644	Beihai picorna-like virus 99	strain=BHJJX22326	Complete Genome
GCF_001935305.1_ViralProj359892_genomic.fna	GCF_001935305.1	1922645	1922645	Beihai razor shell virus 1	strain=BHZC37272	Complete Genome
GCF_001934565.1_ViralProj359891_genomic.fna	GCF_001934565.1	1922646	1922646	Beihai razor shell virus 2	strain=BHBei76898	Complete Genome
GCF_001934665.1_ViralProj359820_genomic.fna	GCF_001934665.1	1922647	1922647	Beihai razor shell virus 3	strain=BHZC45609	Complete Genome
GCF_001933845.1_ViralProj359819_genomic.fna	GCF_001933845.1	1922648	1922648	Beihai razor shell virus 4	strain=BHZC37363	Complete Genome
GCF_001934205.1_ViralProj359818_genomic.fna	GCF_001934205.1	1922651	1922651	Beihai rhabdo-like virus 1	strain=BHTSS15727	Complete Genome
GCF_001933565.1_ViralProj359817_genomic.fna	GCF_001933565.1	1922652	1922652	Beihai rhabdo-like virus 2	strain=BHTSS7258	Complete Genome
GCF_001934645.1_ViralProj359816_genomic.fna	GCF_001934645.1	1922654	1922654	Beihai rhabdo-like virus 4	strain=BHJP58499	Complete Genome
GCF_001933825.1_ViralProj359815_genomic.fna	GCF_001933825.1	1922655	1922655	Beihai rhabdo-like virus 5	strain=BHJP63888	Complete Genome
GCF_001934185.1_ViralProj359814_genomic.fna	GCF_001934185.1	1922656	1922656	Beihai rhabdo-like virus 6	strain=BHJJX49420	Complete Genome
GCF_001933545.1_ViralProj359813_genomic.fna	GCF_001933545.1	1922657	1922657	Beihai sea slater virus 1	strain=BHHZL10310	Complete Genome
GCF_001934625.1_ViralProj359812_genomic.fna	GCF_001934625.1	1922658	1922658	Beihai sea slater virus 2	strain=BHHZL10411	Complete Genome
GCF_001933805.1_ViralProj359811_genomic.fna	GCF_001933805.1	1922659	1922659	Beihai sea slater virus 3	strain=BHHZL10233	Complete Genome
GCF_001934165.1_ViralProj359810_genomic.fna	GCF_001934165.1	1922660	1922660	Beihai sea slater virus 4	strain=BHHZL10410	Complete Genome
GCF_001933525.1_ViralProj359809_genomic.fna	GCF_001933525.1	1922661	1922661	Beihai sesarmid crab virus 1	strain=SCJXSX39422	Complete Genome
GCF_001934605.1_ViralProj359808_genomic.fna	GCF_001934605.1	1922662	1922662	Beihai sesarmid crab virus 2	strain=SCJXSX39002	Complete Genome
GCF_002288695.1_ViralMultiSegProj358989_genomic.fna	GCF_002288695.1	1922663	1922663	Beihai sesarmid crab virus 3	strain=SCJXSX39048	Complete Genome
GCF_002288775.1_ViralMultiSegProj358988_genomic.fna	GCF_002288775.1	1922664	1922664	Beihai sesarmid crab virus 4	strain=SCJXSX38901	Complete Genome
GCF_001933785.1_ViralProj359807_genomic.fna	GCF_001933785.1	1922666	1922666	Beihai sesarmid crab virus 7	strain=SCJXSX14567	Complete Genome
GCF_001935245.1_ViralProj359926_genomic.fna	GCF_001935245.1	1922667	1922667	Beihai shrimp virus 1	strain=BHBJDX17672	Complete Genome
GCF_001935885.1_ViralProj359925_genomic.fna	GCF_001935885.1	1922668	1922668	Beihai shrimp virus 2	strain=BHWZXX12501	Complete Genome
GCF_002004255.1_ViralMultiSegProj375035_genomic.fna	GCF_002004255.1	1922669	1922669	Beihai shrimp virus 3	strain=BHBJDX18821	Complete Genome
GCF_001935465.1_ViralProj359924_genomic.fna	GCF_001935465.1	1922670	1922670	Beihai shrimp virus 4	strain=BHWZXX19227	Complete Genome
GCF_001935605.1_ViralMultiSegProj359923_genomic.fna	GCF_001935605.1	1922671	1922671	Beihai shrimp virus 5	strain=BHWZXX15615	Complete Genome
GCF_001935225.1_ViralMultiSegProj359922_genomic.fna	GCF_001935225.1	1922672	1922672	Beihai shrimp virus 6	strain=BHBJDX18793	Complete Genome
GCF_001935865.1_ViralProj359921_genomic.fna	GCF_001935865.1	1922673	1922673	Beihai sipunculid worm virus 1	strain=BHNXC40689	Complete Genome
GCF_001935445.1_ViralProj359920_genomic.fna	GCF_001935445.1	1922674	1922674	Beihai sipunculid worm virus 2	strain=BHNXC41483	Complete Genome
GCF_001935585.1_ViralProj359919_genomic.fna	GCF_001935585.1	1922675	1922675	Beihai sipunculid worm virus 3	strain=BHZC37455	Complete Genome
GCF_001935205.1_ViralProj359918_genomic.fna	GCF_001935205.1	1922676	1922676	Beihai sipunculid worm virus 4	strain=BHZC37368	Complete Genome
GCF_001935845.1_ViralProj359917_genomic.fna	GCF_001935845.1	1922677	1922677	Beihai sipunculid worm virus 5	strain=BHNXC41492	Complete Genome
GCF_001935425.1_ViralProj359916_genomic.fna	GCF_001935425.1	1922678	1922678	Beihai sipunculid worm virus 6	strain=BHNXC41400	Complete Genome
GCF_001935565.1_ViralProj359915_genomic.fna	GCF_001935565.1	1922680	1922680	Beihai sobemo-like virus 1	strain=BHZY60709	Complete Genome
GCF_001924395.1_ViralProj358987_genomic.fna	GCF_001924395.1	1922681	1922681	Beihai sobemo-like virus 10	strain=BHZY60634	Complete Genome
GCF_001935185.1_ViralProj359914_genomic.fna	GCF_001935185.1	1922682	1922682	Beihai sobemo-like virus 11	strain=BHZY59277	Complete Genome
GCF_001961555.1_ViralProj361949_genomic.fna	GCF_001961555.1	1922683	1922683	Beihai sobemo-like virus 12	strain=HOU156693	Complete Genome
GCF_001962295.1_ViralProj361948_genomic.fna	GCF_001962295.1	1922684	1922684	Beihai sobemo-like virus 13	strain=YYSZX17641	Complete Genome
GCF_001924855.1_ViralProj358986_genomic.fna	GCF_001924855.1	1922685	1922685	Beihai sobemo-like virus 14	strain=HOU157842	Complete Genome
GCF_001963815.1_ViralProj361947_genomic.fna	GCF_001963815.1	1922686	1922686	Beihai sobemo-like virus 15	strain=BHBJDX18383	Complete Genome
GCF_001963215.1_ViralProj361946_genomic.fna	GCF_001963215.1	1922687	1922687	Beihai sobemo-like virus 16	strain=BHCL80925	Complete Genome
GCF_001923495.1_ViralProj358985_genomic.fna	GCF_001923495.1	1922688	1922688	Beihai sobemo-like virus 17	strain=HOU157151	Complete Genome
GCF_001961535.1_ViralProj361945_genomic.fna	GCF_001961535.1	1922689	1922689	Beihai sobemo-like virus 18	strain=BWBFG40814	Complete Genome
GCF_001962275.1_ViralProj361944_genomic.fna	GCF_001962275.1	1922690	1922690	Beihai sobemo-like virus 19	strain=BHBJDX18617	Complete Genome
GCF_001963795.1_ViralProj361943_genomic.fna	GCF_001963795.1	1922691	1922691	Beihai sobemo-like virus 2	strain=BHZC35241	Complete Genome
GCF_001963195.1_ViralProj361942_genomic.fna	GCF_001963195.1	1922692	1922692	Beihai sobemo-like virus 20	strain=BHNXC40978	Complete Genome
GCF_001961515.1_ViralProj361941_genomic.fna	GCF_001961515.1	1922693	1922693	Beihai sobemo-like virus 21	strain=BHZY58647	Complete Genome
GCF_001962255.1_ViralProj361940_genomic.fna	GCF_001962255.1	1922694	1922694	Beihai sobemo-like virus 22	strain=BHWZXX14614	Complete Genome
GCF_001963775.1_ViralProj361939_genomic.fna	GCF_001963775.1	1922695	1922695	Beihai sobemo-like virus 23	strain=BHZY181484	Complete Genome
GCF_001923955.1_ViralProj358984_genomic.fna	GCF_001923955.1	1922696	1922696	Beihai sobemo-like virus 24	strain=BHBJDX18033	Complete Genome
GCF_001963175.1_ViralProj361938_genomic.fna	GCF_001963175.1	1922697	1922697	Beihai sobemo-like virus 25	strain=BHZC34084	Complete Genome
GCF_001924375.1_ViralProj358983_genomic.fna	GCF_001924375.1	1922698	1922698	Beihai sobemo-like virus 26	strain=BHTH8711	Complete Genome
GCF_001961495.1_ViralProj361937_genomic.fna	GCF_001961495.1	1922699	1922699	Beihai sobemo-like virus 27	strain=BHWZXX15541	Complete Genome
GCF_001962235.1_ViralProj361936_genomic.fna	GCF_001962235.1	1922700	1922700	Beihai sobemo-like virus 3	strain=BHZY60830	Complete Genome
GCF_001963755.1_ViralProj361935_genomic.fna	GCF_001963755.1	1922701	1922701	Beihai sobemo-like virus 4	strain=BHZY59438	Complete Genome
GCF_001963155.1_ViralProj361934_genomic.fna	GCF_001963155.1	1922702	1922702	Beihai sobemo-like virus 5	strain=BHZY60175	Complete Genome
GCF_001961475.1_ViralProj361933_genomic.fna	GCF_001961475.1	1922703	1922703	Beihai sobemo-like virus 6	strain=BWBFG40829	Complete Genome
GCF_001962215.1_ViralProj361932_genomic.fna	GCF_001962215.1	1922704	1922704	Beihai sobemo-like virus 7	strain=BHZY60654	Complete Genome
GCF_001963735.1_ViralProj361931_genomic.fna	GCF_001963735.1	1922705	1922705	Beihai sobemo-like virus 8	strain=BWBFG36635	Complete Genome
GCF_001963135.1_ViralProj361930_genomic.fna	GCF_001963135.1	1922706	1922706	Beihai sobemo-like virus 9	strain=BHZY60769	Complete Genome
GCF_001961455.1_ViralProj361929_genomic.fna	GCF_001961455.1	1922707	1922707	Beihai sphaeromadae virus 1	strain=BHTSS18012	Complete Genome
GCF_001962195.1_ViralProj361928_genomic.fna	GCF_001962195.1	1922708	1922708	Beihai sphaeromadae virus 2	strain=BHTSS26432	Complete Genome
GCF_001921295.1_ViralMultiSegProj358542_genomic.fna	GCF_001921295.1	1922709	1922709	Beihai sphaeromadae virus 3	strain=BHTSS17005	Complete Genome
GCF_001963715.1_ViralProj361927_genomic.fna	GCF_001963715.1	1922710	1922710	Beihai sphaeromadae virus 4	strain=BHTSS17969	Complete Genome
GCF_001963115.1_ViralProj361926_genomic.fna	GCF_001963115.1	1922711	1922711	Beihai tiger crab virus 1	strain=HWRTX14333	Complete Genome
GCF_001961435.1_ViralProj361925_genomic.fna	GCF_001961435.1	1922712	1922712	Beihai tombus-like virus 1	strain=SCJXSX39078	Complete Genome
GCF_001962175.1_ViralProj361924_genomic.fna	GCF_001962175.1	1922713	1922713	Beihai tombus-like virus 10	strain=BHZY59908	Complete Genome
GCF_001963695.1_ViralProj361923_genomic.fna	GCF_001963695.1	1922714	1922714	Beihai tombus-like virus 11	strain=BHHK128439	Complete Genome
GCF_001961715.1_ViralProj361981_genomic.fna	GCF_001961715.1	1922715	1922715	Beihai tombus-like virus 12	strain=BHTSS17936	Complete Genome
GCF_001962455.1_ViralProj361980_genomic.fna	GCF_001962455.1	1922716	1922716	Beihai tombus-like virus 13	strain=BHZC37436	Complete Genome
GCF_001963975.1_ViralProj361979_genomic.fna	GCF_001963975.1	1922717	1922717	Beihai tombus-like virus 14	strain=BHZC37000	Complete Genome
GCF_001963375.1_ViralProj361978_genomic.fna	GCF_001963375.1	1922718	1922718	Beihai tombus-like virus 15	strain=BHBJDX18752	Complete Genome
GCF_001961695.1_ViralProj361977_genomic.fna	GCF_001961695.1	1922719	1922719	Beihai tombus-like virus 16	strain=BHWZXX15284	Complete Genome
GCF_001962435.1_ViralProj361976_genomic.fna	GCF_001962435.1	1922720	1922720	Beihai tombus-like virus 17	strain=BHZC33014	Complete Genome
GCF_001963955.1_ViralProj361975_genomic.fna	GCF_001963955.1	1922721	1922721	Beihai tombus-like virus 18	strain=BHZY60611	Complete Genome
GCF_001967275.1_ViralProj360421_genomic.fna	GCF_001967275.1	1922722	1922722	Beihai tombus-like virus 19	strain=BHTH16144	Complete Genome
GCF_001963355.1_ViralProj361974_genomic.fna	GCF_001963355.1	1922723	1922723	Beihai tombus-like virus 2	strain=BHNXC41455	Complete Genome
GCF_001961675.1_ViralProj361973_genomic.fna	GCF_001961675.1	1922724	1922724	Beihai tombus-like virus 3	strain=BHZY54477	Complete Genome
GCF_001924835.1_ViralProj358982_genomic.fna	GCF_001924835.1	1922725	1922725	Beihai tombus-like virus 4	strain=BHZY58951	Complete Genome
GCF_001962415.1_ViralProj361972_genomic.fna	GCF_001962415.1	1922726	1922726	Beihai tombus-like virus 5	strain=HOU131178	Complete Genome
GCF_001963935.1_ViralProj361971_genomic.fna	GCF_001963935.1	1922728	1922728	Beihai tombus-like virus 7	strain=BHBJDX18773	Complete Genome
GCF_001963335.1_ViralProj361970_genomic.fna	GCF_001963335.1	1922729	1922729	Beihai tombus-like virus 8	strain=BHZY60516	Complete Genome
GCF_001961655.1_ViralProj361969_genomic.fna	GCF_001961655.1	1922730	1922730	Beihai tombus-like virus 9	strain=BHZY58393	Complete Genome
GCF_001962395.1_ViralProj361968_genomic.fna	GCF_001962395.1	1922734	1922734	Beihai toti-like virus 4	strain=HOU154008	Complete Genome
GCF_001963915.1_ViralProj361967_genomic.fna	GCF_001963915.1	1922736	1922736	Beihai uca arcuata virus 1	strain=BFZCX5633	Complete Genome
GCF_001963315.1_ViralProj361966_genomic.fna	GCF_001963315.1	1922737	1922737	Beihai victori-like virus 1	strain=BHZC37363	Complete Genome
GCF_001961635.1_ViralProj361965_genomic.fna	GCF_001961635.1	1922738	1922738	Beihai weivirus-like virus 1	strain=BWBFG40821	Complete Genome
GCF_001962375.1_ViralProj361964_genomic.fna	GCF_001962375.1	1922740	1922740	Beihai weivirus-like virus 11	strain=BWBFG40530	Complete Genome
GCF_001963895.1_ViralProj361963_genomic.fna	GCF_001963895.1	1922741	1922741	Beihai weivirus-like virus 12	strain=BWBFG40815	Complete Genome
GCF_001963295.1_ViralProj361962_genomic.fna	GCF_001963295.1	1922742	1922742	Beihai weivirus-like virus 13	strain=BHZY60103	Complete Genome
GCF_001961615.1_ViralProj361961_genomic.fna	GCF_001961615.1	1922743	1922743	Beihai weivirus-like virus 15	strain=BWBFG27289	Complete Genome
GCF_001962355.1_ViralProj361960_genomic.fna	GCF_001962355.1	1922744	1922744	Beihai weivirus-like virus 16	strain=BHZY60618	Complete Genome
GCF_001963875.1_ViralProj361959_genomic.fna	GCF_001963875.1	1922745	1922745	Beihai weivirus-like virus 17	strain=BHZC37426	Complete Genome
GCF_001963275.1_ViralProj361958_genomic.fna	GCF_001963275.1	1922746	1922746	Beihai weivirus-like virus 18	strain=BHZY59250	Complete Genome
GCF_001961595.1_ViralProj361957_genomic.fna	GCF_001961595.1	1922748	1922748	Beihai weivirus-like virus 2	strain=BHZC36779	Complete Genome
GCF_001962335.1_ViralProj361956_genomic.fna	GCF_001962335.1	1922749	1922749	Beihai weivirus-like virus 20	strain=BWBFG40173	Complete Genome
GCF_001963855.1_ViralProj361955_genomic.fna	GCF_001963855.1	1922750	1922750	Beihai weivirus-like virus 21	strain=BHZY60867	Complete Genome
GCF_001963255.1_ViralProj361954_genomic.fna	GCF_001963255.1	1922751	1922751	Beihai weivirus-like virus 3	strain=BHZY60776	Complete Genome
GCF_001961575.1_ViralProj361953_genomic.fna	GCF_001961575.1	1922752	1922752	Beihai weivirus-like virus 4	strain=BWBFG40762	Complete Genome
GCF_001964135.1_ViralProj362011_genomic.fna	GCF_001964135.1	1922753	1922753	Beihai weivirus-like virus 5	strain=BHZY60693	Complete Genome
GCF_001963535.1_ViralProj362010_genomic.fna	GCF_001963535.1	1922754	1922754	Beihai weivirus-like virus 7	strain=BHZY60887	Complete Genome
GCF_001961855.1_ViralProj362009_genomic.fna	GCF_001961855.1	1922755	1922755	Beihai weivirus-like virus 8	strain=BHZC36478	Complete Genome
GCF_001962595.1_ViralProj362008_genomic.fna	GCF_001962595.1	1922756	1922756	Beihai weivirus-like virus 9	strain=BWBFG39428	Complete Genome
GCF_001964115.1_ViralProj362007_genomic.fna	GCF_001964115.1	1922757	1922757	Beihai zhaovirus-like virus 1	strain=BHZY59866	Complete Genome
GCF_001963515.1_ViralProj362006_genomic.fna	GCF_001963515.1	1922758	1922758	Beihai zhaovirus-like virus 2	strain=BHTSS12281	Complete Genome
GCF_001961835.1_ViralProj362005_genomic.fna	GCF_001961835.1	1922759	1922759	Beihai zhaovirus-like virus 3	strain=BHZY60564	Complete Genome
GCF_001962575.1_ViralProj362004_genomic.fna	GCF_001962575.1	1922760	1922760	Beihai zhaovirus-like virus 4	strain=BHZY60633	Complete Genome
GCF_001964095.1_ViralProj362003_genomic.fna	GCF_001964095.1	1922761	1922761	Beihai zhaovirus-like virus 5	strain=BHNXC41311	Complete Genome
GCF_000019845.1_ASM1984v1_genomic.fna	GCF_000019845.1	395963	533	Beijerinckia indica subsp. indica ATCC 9039	strain=ATCC 9039	Complete Genome
GCF_000868925.1_ViralProj16630_genomic.fna	GCF_000868925.1	341053	341053	Beilong virus		Complete Genome
GCF_000892875.1_ViralProj70001_genomic.fna	GCF_000892875.1	354328	354328	Bell pepper alphaendornavirus		Complete Genome
GCF_000873425.1_ViralProj20059_genomic.fna	GCF_000873425.1	368735	368735	Bell pepper mottle virus		Complete Genome
GCF_001308735.1_ViralProj297596_genomic.fna	GCF_001308735.1	1720595	1720595	Bellflower vein chlorosis virus		Complete Genome
GCF_000265405.1_ASM26540v1_genomic.fna	GCF_000265405.1	866536	232259	Belliella baltica DSM 15883	strain=DSM 15883	Complete Genome
GCF_000872845.1_ViralProj29509_genomic.fna	GCF_000872845.1	694015	694015	Beluga Whale coronavirus SW1		Complete Genome
GCF_002210855.1_ViralProj392129_genomic.fna	GCF_002210855.1	1986477	1986477	Bemisia-associated genomovirus AdDF		Complete Genome
GCF_002211035.1_ViralProj392156_genomic.fna	GCF_002211035.1	1986478	1986478	Bemisia-associated genomovirus AdO		Complete Genome
GCF_002210835.1_ViralProj392155_genomic.fna	GCF_002210835.1	1986479	1986479	Bemisia-associated genomovirus NfO		Complete Genome
GCF_001926835.1_ViralProj359254_genomic.fna	GCF_001926835.1	1930269	1930269	Bermuda grass latent virus		Complete Genome
GCF_000265505.1_ASM26550v1_genomic.fna	GCF_000265505.1	880071	999	Bernardetia litoralis DSM 6794	strain=DSM 6794	Complete Genome
GCF_000927035.1_ViralProj264908_genomic.fna	GCF_000927035.1	318834	1972594	Berrimah virus	strain=DPP 63	Complete Genome
GCF_000342265.1_ASM34226v1_genomic.fna	GCF_000342265.1	543913	543913	beta proteobacterium CB	strain=CB	Complete Genome
GCF_000511025.2_RefBeet-1.2.2_genomic.fna	GCF_000511025.2	3555	161934	Beta vulgaris subsp. vulgaris		Chromosome
GCF_000912235.1_ViralProj226084_genomic.fna	GCF_000912235.1	1385427	1965093	Betacoronavirus Erinaceus
GCF_000930095.1_ViralProj271776_genomic.fna	GCF_000930095.1	1590370	1590370	Betacoronavirus HKU24	strain=HKU24-R05005I	Complete Genome
GCF_001953215.1_ASM195321v1_genomic.fna	GCF_001953215.1	1904640	1904640	Betaproteobacteria bacterium GR16-43	strain=GR16-43	Complete Genome
GCF_000887415.1_ViralProj48601_genomic.fna	GCF_000887415.1	759701	1513248	Bettongia penicillata papillomavirus 1		Complete Genome
GCF_000023105.1_ASM2310v1_genomic.fna	GCF_000023105.1	471853	84757	Beutenbergia cavernae DSM 12333	strain=DSM 12333	Complete Genome
GCF_001019855.1_ViralMultiSegProj285593_genomic.fna	GCF_001019855.1	1213620	1213620	Bhanja virus	strain=ibAr2709	Complete Genome
GCF_000843925.1_ViralProj14445_genomic.fna	GCF_000843925.1	186371	186371	Bhendi yellow vein betasatellite		Complete Genome
GCF_000881075.1_ViralProj33885_genomic.fna	GCF_000881075.1	591160	591160	Bhendi yellow vein Bhubhaneswar virus		Complete Genome
GCF_001046725.1_ViralProj33677_genomic.fna	GCF_001046725.1	1088661	1088661	Bhendi yellow vein Delhi virus		Complete Genome
GCF_000891395.1_ViralProj61557_genomic.fna	GCF_000891395.1	908010	908009	Bhendi yellow vein India betasatellite India:Aurangabad:OY164:2006		Complete Genome
GCF_000889575.1_ViralProj61555_genomic.fna	GCF_000889575.1	908028	908023	Bhendi yellow vein India virus India:Dharwad OYDWR2:2006		Complete Genome
GCF_000989055.1_ViralProj283064_genomic.fna	GCF_000989055.1	759124	759124	Bhendi yellow vein mosaic alphasatellite		Complete Genome
GCF_000889595.1_ViralProj61777_genomic.fna	GCF_000889595.1	908072	908070	Bhendi yellow vein mosaic betasatellite India:Coimbator:OYCO1:2005		Complete Genome
GCF_001046705.1_ViralProj14159_genomic.fna	GCF_001046705.1	120168	120168	Bhendi yellow vein mosaic virus		Complete Genome
GCF_000898635.1_ViralProj174781_genomic.fna	GCF_000898635.1	1225644	1225644	Bhendi yellow vein mosaic virus-associated alphasatellite		Complete Genome
GCF_000521725.1_ASM52172v1_genomic.fna	GCF_000521725.1	1263829	47735	Bibersteinia trehalosi USDA-ARS-USMARC-188	strain=USDA-ARS-USMARC-188	Complete Genome
GCF_000521745.1_ASM52174v1_genomic.fna	GCF_000521745.1	1263831	47735	Bibersteinia trehalosi USDA-ARS-USMARC-189	strain=USDA-ARS-USMARC-189	Complete Genome
GCF_000521765.1_ASM52176v1_genomic.fna	GCF_000521765.1	1263832	47735	Bibersteinia trehalosi USDA-ARS-USMARC-190	strain=USDA-ARS-USMARC-190	Complete Genome
GCF_000347595.1_ASM34759v1_genomic.fna	GCF_000347595.1	1171377	47735	Bibersteinia trehalosi USDA-ARS-USMARC-192	strain=USDA-ARS-USMARC-192	Complete Genome
GCF_000915195.1_ViralProj230992_genomic.fna	GCF_000915195.1	320856	320856	Bidens mosaic virus		Complete Genome
GCF_000889115.1_ViralProj50559_genomic.fna	GCF_000889115.1	433357	433357	Bidens mottle virus		Complete Genome
GCF_001263395.1_ASM126339v1_genomic.fna	GCF_001263395.1	1437605	638619	Bifidobacterium actinocoloniiforme DSM 22766	strain=DSM 22766	Complete Genome
GCF_000737885.1_ASM73788v1_genomic.fna	GCF_000737885.1	1680	1680	Bifidobacterium adolescentis	strain=22L	Complete Genome
GCF_000817995.1_ASM81799v1_genomic.fna	GCF_000817995.1	1680	1680	Bifidobacterium adolescentis	strain=BBMN23	Complete Genome
GCF_000010425.1_ASM1042v1_genomic.fna	GCF_000010425.1	367928	1680	Bifidobacterium adolescentis ATCC 15703	strain=ATCC 15703	Complete Genome
GCF_000966445.2_ASM96644v2_genomic.fna	GCF_000966445.2	1683	1683	Bifidobacterium angulatum	strain=GT102	Complete Genome
GCF_001025155.1_ASM102515v1_genomic.fna	GCF_001025155.1	518635	1683	Bifidobacterium angulatum DSM 20098 = JCM 7096	strain=JCM 7096	Complete Genome
GCF_000695895.1_ASM69589v1_genomic.fna	GCF_000695895.1	28025	28025	Bifidobacterium animalis	strain=RH	Complete Genome
GCF_000817045.1_ASM81704v1_genomic.fna	GCF_000817045.1	28025	28025	Bifidobacterium animalis	strain=A6	Complete Genome
GCF_001688645.2_ASM168864v2_genomic.fna	GCF_001688645.2	302912	28025	Bifidobacterium animalis subsp. animalis	strain=YL2	Complete Genome
GCF_000260715.1_ASM26071v1_genomic.fna	GCF_000260715.1	703613	28025	Bifidobacterium animalis subsp. animalis ATCC 25527	strain=ATCC 25527	Complete Genome
GCF_000818055.1_ASM81805v1_genomic.fna	GCF_000818055.1	302911	28025	Bifidobacterium animalis subsp. lactis	strain=BF052	Complete Genome
GCF_000021425.1_ASM2142v1_genomic.fna	GCF_000021425.1	442563	28025	Bifidobacterium animalis subsp. lactis AD011	strain=AD011	Complete Genome
GCF_000471945.1_ASM47194v1_genomic.fna	GCF_000471945.1	1167629	28025	Bifidobacterium animalis subsp. lactis ATCC 27673	strain=ATCC 27673	Complete Genome
GCF_000277325.1_ASM27732v1_genomic.fna	GCF_000277325.1	1168290	28025	Bifidobacterium animalis subsp. lactis B420	strain=B420	Complete Genome
GCF_000025245.1_ASM2524v1_genomic.fna	GCF_000025245.1	552531	28025	Bifidobacterium animalis subsp. lactis BB-12	strain=BB-12	Complete Genome
GCF_000277345.1_ASM27734v1_genomic.fna	GCF_000277345.1	742729	28025	Bifidobacterium animalis subsp. lactis Bi-07	strain=Bi-07	Complete Genome
GCF_000022705.1_ASM2270v1_genomic.fna	GCF_000022705.1	580050	28025	Bifidobacterium animalis subsp. lactis Bl-04	strain=Bl-04; ATCC SD5219	Complete Genome
GCF_000414215.1_ASM41421v1_genomic.fna	GCF_000414215.1	1281781	28025	Bifidobacterium animalis subsp. lactis Bl12	strain=Bl12	Complete Genome
GCF_000224965.2_ASM22496v2_genomic.fna	GCF_000224965.2	1075106	28025	Bifidobacterium animalis subsp. lactis BLC1	strain=BLC1	Complete Genome
GCF_000220885.1_ASM22088v1_genomic.fna	GCF_000220885.1	1042403	28025	Bifidobacterium animalis subsp. lactis CNCM I-2494	strain=CNCM I-2494	Complete Genome
GCF_000022965.1_ASM2296v1_genomic.fna	GCF_000022965.1	555970	28025	Bifidobacterium animalis subsp. lactis DSM 10140	strain=DSM 10140	Complete Genome
GCF_000816205.1_ASM81620v1_genomic.fna	GCF_000816205.1	1316911	28025	Bifidobacterium animalis subsp. lactis KLDS2.0603	strain=KLDS2.0603	Complete Genome
GCF_000092765.1_ASM9276v1_genomic.fna	GCF_000092765.1	573236	28025	Bifidobacterium animalis subsp. lactis V9	strain=V9	Complete Genome
GCF_000304215.1_ASM30421v1_genomic.fna	GCF_000304215.1	1147128	1684	Bifidobacterium asteroides PRL2011	strain=PRL2011	Complete Genome
GCF_001281345.1_ASM128134v1_genomic.fna	GCF_001281345.1	1681	1681	Bifidobacterium bifidum	strain=BF3	Complete Genome
GCF_001025135.1_ASM102513v1_genomic.fna	GCF_001025135.1	500634	1681	Bifidobacterium bifidum ATCC 29521 = JCM 1255 = DSM 20456	strain=JCM 1255	Complete Genome
GCF_000265095.1_ASM26509v1_genomic.fna	GCF_000265095.1	484020	1681	Bifidobacterium bifidum BGN4	strain=BGN4	Complete Genome
GCF_000165905.1_ASM16590v1_genomic.fna	GCF_000165905.1	702459	1681	Bifidobacterium bifidum PRL2010	strain=PRL2010	Complete Genome
GCF_000164965.1_ASM16496v1_genomic.fna	GCF_000164965.1	883062	1681	Bifidobacterium bifidum S17	strain=S17	Complete Genome
GCF_001281425.1_ASM128142v1_genomic.fna	GCF_001281425.1	1685	1685	Bifidobacterium breve	strain=BR3	Complete Genome
GCF_001990225.1_ASM199022v1_genomic.fna	GCF_001990225.1	1685	1685	Bifidobacterium breve	strain=LMC520	Complete Genome
GCF_000568955.1_ASM56895v1_genomic.fna	GCF_000568955.1	1385938	1685	Bifidobacterium breve 12L	strain=12L	Complete Genome
GCF_000569055.1_ASM56905v1_genomic.fna	GCF_000569055.1	1385942	1685	Bifidobacterium breve 689b	strain=689b	Complete Genome
GCF_000213865.1_ASM21386v1_genomic.fna	GCF_000213865.1	866777	1685	Bifidobacterium breve ACS-071-V-Sch8b	strain=ACS-071-V-Sch8b	Complete Genome
GCF_001025175.1_ASM102517v1_genomic.fna	GCF_001025175.1	518634	1685	Bifidobacterium breve DSM 20213 = JCM 1192	strain=JCM 1192	Complete Genome
GCF_000568975.1_ASM56897v1_genomic.fna	GCF_000568975.1	1385939	1685	Bifidobacterium breve JCM 7017	strain=JCM 7017	Complete Genome
GCF_000569015.1_ASM56901v1_genomic.fna	GCF_000569015.1	1385940	1685	Bifidobacterium breve JCM 7019	strain=JCM 7019	Complete Genome
GCF_000569035.1_ASM56903v1_genomic.fna	GCF_000569035.1	1385941	1685	Bifidobacterium breve NCFB 2258	strain=NCFB 2258	Complete Genome
GCF_000569075.1_ASM56907v1_genomic.fna	GCF_000569075.1	936351	1685	Bifidobacterium breve S27	strain=S27	Complete Genome
GCF_000220135.1_ASM22013v1_genomic.fna	GCF_000220135.1	326426	1685	Bifidobacterium breve UCC2003	strain=UCC2003	Complete Genome
GCF_001025195.1_ASM102519v1_genomic.fna	GCF_001025195.1	566552	1686	Bifidobacterium catenulatum DSM 16992 = JCM 1194 = LMG 11043	strain=JCM 1194	Complete Genome
GCF_000737865.1_ASM73786v1_genomic.fna	GCF_000737865.1	1687	1687	Bifidobacterium coryneforme	strain=LMG18911	Complete Genome
GCF_000024445.1_ASM2444v1_genomic.fna	GCF_000024445.1	401473	1689	Bifidobacterium dentium Bd1	strain=Bd1	Complete Genome
GCF_001042595.1_ASM104259v1_genomic.fna	GCF_001042595.1	1150423	1689	Bifidobacterium dentium JCM 1195 = DSM 20436	strain=JCM 1195	Complete Genome
GCF_000706765.1_ASM70676v1_genomic.fna	GCF_000706765.1	1341694	1691	Bifidobacterium indicum LMG 11587 = DSM 20214	strain=LMG 11587	Complete Genome
GCF_001042615.1_ASM104261v1_genomic.fna	GCF_001042615.1	1150460	630129	Bifidobacterium kashiwanohense JCM 15439 = DSM 21854	strain=JCM 15439	Complete Genome
GCF_000800455.1_ASM80045v1_genomic.fna	GCF_000800455.1	1447716	630129	Bifidobacterium kashiwanohense PV20-2	strain=PV20-2	Complete Genome
GCF_000730205.1_ASM73020v1_genomic.fna	GCF_000730205.1	216816	216816	Bifidobacterium longum	strain=BXY01	Complete Genome
GCF_000829295.1_ASM82929v1_genomic.fna	GCF_000829295.1	216816	216816	Bifidobacterium longum	strain=105-A	Complete Genome
GCF_001293145.1_ASM129314v1_genomic.fna	GCF_001293145.1	216816	216816	Bifidobacterium longum	strain=BG7	Complete Genome
GCF_001719085.1_ASM171908v1_genomic.fna	GCF_001719085.1	216816	216816	Bifidobacterium longum	strain=35624	Complete Genome
GCF_000008945.1_ASM894v1_genomic.fna	GCF_000008945.1	205913	216816	Bifidobacterium longum DJO10A	strain=DJO10A	Complete Genome
GCF_000007525.1_ASM752v1_genomic.fna	GCF_000007525.1	206672	216816	Bifidobacterium longum NCC2705	strain=NCC2705	Complete Genome
GCF_001281305.1_ASM128130v1_genomic.fna	GCF_001281305.1	1682	216816	Bifidobacterium longum subsp. infantis	strain=BT1	Complete Genome
GCF_000196575.1_ASM19657v1_genomic.fna	GCF_000196575.1	565040	216816	Bifidobacterium longum subsp. infantis 157F	strain=157F	Complete Genome
GCF_000020425.1_ASM2042v1_genomic.fna	GCF_000020425.1	391904	216816	Bifidobacterium longum subsp. infantis ATCC 15697 = JCM 1222 = DSM 20088	strain=ATCC 15697	Complete Genome
GCF_000269965.1_ASM26996v1_genomic.fna	GCF_000269965.1	391904	216816	Bifidobacterium longum subsp. infantis ATCC 15697 = JCM 1222 = DSM 20088	strain=JCM 1222	Complete Genome
GCF_001446255.1_ASM144625v1_genomic.fna	GCF_001446255.1	1679	216816	Bifidobacterium longum subsp. longum	strain=NCIMB8809	Complete Genome
GCF_001446275.1_ASM144627v1_genomic.fna	GCF_001446275.1	1679	216816	Bifidobacterium longum subsp. longum	strain=CCUG30698	Complete Genome
GCF_001725985.1_ASM172598v1_genomic.fna	GCF_001725985.1	1679	216816	Bifidobacterium longum subsp. longum	strain=AH1206	Complete Genome
GCF_000166315.1_ASM16631v1_genomic.fna	GCF_000166315.1	890402	216816	Bifidobacterium longum subsp. longum BBMN68	strain=BBMN68	Complete Genome
GCF_000772485.1_ASM77248v1_genomic.fna	GCF_000772485.1	1300227	216816	Bifidobacterium longum subsp. longum GT15	strain=GT15	Complete Genome
GCF_000196555.1_ASM19655v1_genomic.fna	GCF_000196555.1	565042	216816	Bifidobacterium longum subsp. longum JCM 1217	strain=JCM 1217	Complete Genome
GCF_000092325.1_ASM9232v1_genomic.fna	GCF_000092325.1	759350	216816	Bifidobacterium longum subsp. longum JDM301	strain=JDM301	Complete Genome
GCF_000219455.1_ASM21945v1_genomic.fna	GCF_000219455.1	1035817	216816	Bifidobacterium longum subsp. longum KACC 91563	strain=KACC 91563	Complete Genome
GCF_001025215.1_ASM102521v1_genomic.fna	GCF_001025215.1	547043	28026	Bifidobacterium pseudocatenulatum DSM 20438 = JCM 1200 = LMG 10505	strain=JCM 1200	Complete Genome
GCF_000800475.2_ASM80047v2_genomic.fna	GCF_000800475.2	1447715	1694	Bifidobacterium pseudolongum PV8-2	strain=PV8-2	Complete Genome
GCF_001042635.1_ASM104263v1_genomic.fna	GCF_001042635.1	1150461	158787	Bifidobacterium scardovii JCM 12489 = DSM 13734	strain=JCM 12489	Complete Genome
GCF_000347695.1_ASM34769v1_genomic.fna	GCF_000347695.1	1254439	33905	Bifidobacterium thermophilum RBL67	strain=RBL67	Complete Genome
GCF_002024675.1_ViralProj378401_genomic.fna	GCF_002024675.1	1955196	1955196	Big Cypress virus	strain=BCNP2-24 A	Complete Genome
GCF_002219505.1_ViralProj394323_genomic.fna	GCF_002219505.1	1041883	1041883	Big Sioux River virus	strain=Kenya P9	Complete Genome
GCF_001308375.1_ViralProj298049_genomic.fna	GCF_001308375.1	1712387	1712387	Binucleate Rhizoctonia mitovirus K1		Complete Genome
GCF_001967655.1_ViralProj361677_genomic.fna	GCF_001967655.1	1931369	1931369	Biomphalaria virus 1		Complete Genome
GCF_001974175.1_ViralProj368708_genomic.fna	GCF_001974175.1	1931370	1931370	Biomphalaria virus 2		Complete Genome
GCF_001968155.1_ViralProj361676_genomic.fna	GCF_001968155.1	1931371	1931371	Biomphalaria virus 3		Complete Genome
GCF_002145905.1_ViralMultiSegProj386296_genomic.fna	GCF_002145905.1	1980631	1980631	Bipolaris maydis partitivirus 1	strain=JZ04	Complete Genome
GCF_002024795.1_ViralProj378400_genomic.fna	GCF_002024795.1	1955197	1955197	Biratnagar virus	strain=Nepal12-1	Complete Genome
GCF_000866905.1_ViralProj16245_genomic.fna	GCF_000866905.1	316106	292626	Bitter gourd leaf curl betasatellite		Complete Genome
GCF_000926175.1_ViralMultiSegProj261351_genomic.fna	GCF_000926175.1	1513489	1513489	Bitter gourd yellow vein virus		Complete Genome
GCF_001907865.1_ViralProj357842_genomic.fna	GCF_001907865.1	1926998	1926998	Bivalve hepelivirus G	strain=G	Complete Genome
GCF_001907765.1_ViralProj357837_genomic.fna	GCF_001907765.1	1926967	1926967	Bivalve RNA virus G1	strain=G1	Complete Genome
GCF_001907885.1_ViralProj357841_genomic.fna	GCF_001907885.1	1926996	1926996	Bivalve RNA virus G2	strain=G2	Complete Genome
GCF_001907905.1_ViralProj357835_genomic.fna	GCF_001907905.1	1926969	1926969	Bivalve RNA virus G3	strain=G3	Complete Genome
GCF_001907805.1_ViralProj357840_genomic.fna	GCF_001907805.1	1926997	1926997	Bivalve RNA virus G4	strain=G4	Complete Genome
GCF_001907785.1_ViralProj357836_genomic.fna	GCF_001907785.1	1926968	1926968	Bivalve RNA virus G5	strain=G5	Complete Genome
GCF_000855345.1_ViralMultiSegProj14961_genomic.fna	GCF_000855345.1	12285	12285	Black beetle virus		Complete Genome
GCF_002288795.1_ViralMultiSegProj384966_genomic.fna	GCF_002288795.1	1937789	1937789	Black currant leaf chlorosis associated virus		Complete Genome
GCF_000970585.1_ViralMultiSegProj280458_genomic.fna	GCF_000970585.1	1587517	1587517	Black grass cryptic virus 2		Complete Genome
GCF_000970565.1_ViralMultiSegProj280459_genomic.fna	GCF_000970565.1	1587515	1587515	Black grass varicosavirus-like virus		Complete Genome
GCF_000931115.1_ViralProj274159_genomic.fna	GCF_000931115.1	1603066	1603066	Black howler monkey smacovirus		Complete Genome
GCF_000914275.1_ViralMultiSegProj233603_genomic.fna	GCF_000914275.1	2038729	2038729	Black medic leaf roll virus		Complete Genome
GCF_000920555.1_ViralProj243500_genomic.fna	GCF_000920555.1	1441796	1441796	Black medic leafroll alphasatellite 1		Complete Genome
GCF_000851425.1_ViralProj14803_genomic.fna	GCF_000851425.1	92395	92395	Black queen cell virus	strain=South African	Complete Genome
GCF_000867325.1_ViralMultiSegProj17093_genomic.fna	GCF_000867325.1	367301	367301	Black raspberry necrosis virus		Complete Genome
GCF_000872065.1_ViralProj20975_genomic.fna	GCF_000872065.1	463392	463392	Black raspberry virus F		Complete Genome
GCF_000928815.1_ViralProj268566_genomic.fna	GCF_000928815.1	1391037	1391037	Black robin associated gemykibivirus 1		Complete Genome
GCF_000928835.1_ViralProj268860_genomic.fna	GCF_000928835.1	1572341	1891755	Black sea bass polyomavirus 1		Complete Genome
GCF_000881795.1_ViralMultiSegProj32707_genomic.fna	GCF_000881795.1	339420	339420	Blackberry chlorotic ringspot virus		Complete Genome
GCF_000913355.1_ViralProj215129_genomic.fna	GCF_000913355.1	1381464	1381464	Blackberry vein banding-associated virus		Complete Genome
GCF_000893735.1_ViralProj68409_genomic.fna	GCF_000893735.1	1043184	1043184	Blackberry virus E		Complete Genome
GCF_001567075.1_ViralProj312642_genomic.fna	GCF_001567075.1	1490026	1490026	Blackberry Virus F		Complete Genome
GCF_000868605.1_ViralProj18125_genomic.fna	GCF_000868605.1	323118	323118	Blackberry virus Y		Complete Genome
GCF_000858905.1_ViralMultiSegProj15168_genomic.fna	GCF_000858905.1	404196	404196	Blackberry yellow vein-associated virus		Complete Genome
GCF_000927915.1_ViralProj268565_genomic.fna	GCF_000927915.1	1391038	1391038	Blackbird associated gemykibivirus 1		Complete Genome
GCF_000849565.1_ViralMultiSegProj14749_genomic.fna	GCF_000849565.1	65743	65743	Blackcurrant reversion virus		Complete Genome
GCF_000852285.1_ViralProj14821_genomic.fna	GCF_000852285.1	99930	99930	Blackcurrant reversion virus satellite RNA		Complete Genome
GCF_000880175.1_ViralMultiSegProj30183_genomic.fna	GCF_000880175.1	536081	536081	Blainvillea yellow spot virus		Complete Genome
GCF_001402875.1_ASM140287v1_genomic.fna	GCF_001402875.1	1079	1079	Blastochloris viridis	strain=ATCC 19567	Complete Genome
GCF_001459775.1_Blastochloris_viridis_genome_genomic.fna	GCF_001459775.1	1079	1079	Blastochloris viridis		Complete Genome
GCF_001548155.2_BV133_assembly_1.0_genomic.fna	GCF_001548155.2	1079	1079	Blastochloris viridis	strain=DSM 133	Complete Genome
GCF_000284015.1_ASM28401v1_genomic.fna	GCF_000284015.1	1146883	138336	Blastococcus saxobsidens DD2	strain=DD2	Complete Genome
GCF_001713435.1_ASM171343v1_genomic.fna	GCF_001713435.1	1842535	1842535	Blastomonas sp. RAC04	strain=RAC04	Complete Genome
GCF_000348805.1_ASM34880v1_genomic.fna	GCF_000348805.1	1229512	1653831	Blattabacterium cuenoti BPAA	strain=BPAA	Complete Genome
GCF_000262715.1_ASM26271v1_genomic.fna	GCF_000262715.1	1186051	1186051	Blattabacterium sp. (Blaberus giganteus)	strain=BGIGA	Complete Genome
GCF_000334405.1_ASM33440v1_genomic.fna	GCF_000334405.1	1072467	367806	Blattabacterium sp. (Blatta orientalis) str. Tarazona	strain=Tarazona	Complete Genome
GCF_000022605.2_ASM2260v1_genomic.fna	GCF_000022605.2	331104	624186	Blattabacterium sp. (Blattella germanica) str. Bge		Complete Genome
GCF_000236405.1_ASM23640v1_genomic.fna	GCF_000236405.1	1075399	164514	Blattabacterium sp. (Cryptocercus punctulatus) str. Cpu	strain=Cpu	Complete Genome
GCF_000233435.1_ASM23343v1_genomic.fna	GCF_000233435.1	1074889	39768	Blattabacterium sp. (Mastotermes darwiniensis) str. MADAR	strain=MADAR	Complete Genome
GCF_000471965.1_ASM47196v1_genomic.fna	GCF_000471965.1	1316444	1316444	Blattabacterium sp. (Nauphoeta cinerea)		Complete Genome
GCF_000093165.1_ASM9316v1_genomic.fna	GCF_000093165.1	600809	367488	Blattabacterium sp. (Periplaneta americana) str. BPLAN	strain=BPLAN	Complete Genome
GCF_000843285.1_ViralProj14320_genomic.fna	GCF_000843285.1	220638	1513185	Blattella germanica densovirus 1		Complete Genome
GCF_001689125.2_ASM168912v2_genomic.fna	GCF_001689125.2	1796616	1796616	Blautia sp. YL58	strain=YL58	Complete Genome
GCF_000897995.1_ViralMultiSegProj178635_genomic.fna	GCF_000897995.1	1246650	1246650	Blechum interveinal chlorosis virus		Complete Genome
GCF_000973545.1_ASM97354v1_genomic.fna	GCF_000973545.1	1505597	1505597	Blochmannia endosymbiont of Camponotus (Colobopsis) obliquus	strain=757	Complete Genome
GCF_000973505.1_ASM97350v1_genomic.fna	GCF_000973505.1	1505596	1505596	Blochmannia endosymbiont of Polyrhachis (Hedomyrma) turneri	strain=675	Complete Genome
GCF_000853685.1_ViralMultiSegProj14921_genomic.fna	GCF_000853685.1	311176	311176	Blotched snakehead virus		Complete Genome
GCF_000902235.1_ViralProj179427_genomic.fna	GCF_000902235.1	1072517	1072517	Blue squill virus A		Complete Genome
GCF_001448395.1_ViralProj303938_genomic.fna	GCF_001448395.1	1751715	1751715	Blueberry fruit drop associated virus		Complete Genome
GCF_000887675.1_ViralProj56015_genomic.fna	GCF_000887675.1	430710	430710	Blueberry latent virus		Complete Genome
GCF_000921335.1_ViralProj255707_genomic.fna	GCF_000921335.1	1520332	1520332	Blueberry mosaic associated virus		Complete Genome
GCF_000893955.1_ViralMultiSegProj74579_genomic.fna	GCF_000893955.1	1094249	1094249	Blueberry necrotic ring blotch virus	strain=Georgia	Complete Genome
GCF_000837345.1_ViralProj14129_genomic.fna	GCF_000837345.1	172220	172220	Blueberry red ringspot virus		Complete Genome
GCF_000861365.1_ViralProj15329_genomic.fna	GCF_000861365.1	31722	31722	Blueberry scorch virus	strain=NJ-2	Complete Genome
GCF_000912635.1_ViralMultiSegProj218015_genomic.fna	GCF_000912635.1	747056	747056	Blueberry shock virus		Complete Genome
GCF_001586925.1_ViralProj314396_genomic.fna	GCF_001586925.1	1714570	1714570	Blueberry shoestring virus	strain=BSSV	Complete Genome
GCF_000897595.1_ViralProj173920_genomic.fna	GCF_000897595.1	1206566	1206566	Blueberry virus A		Complete Genome
GCF_001678835.1_ViralProj327401_genomic.fna	GCF_001678835.1	1862822	1862822	Bluegill hepadnavirus		Complete Genome
GCF_000898575.1_ViralProj173862_genomic.fna	GCF_000898575.1	1223302	1914574	Bluegill picornavirus		Complete Genome
GCF_000854445.1_ViralMultiSegProj14938_genomic.fna	GCF_000854445.1	40051	40051	Bluetongue virus	strain=serotype 10	Complete Genome
GCF_000889135.1_ViralProj51179_genomic.fna	GCF_000889135.1	864686	1511871	Bocavirus gorilla
GCF_000924715.1_ViralProj265891_genomic.fna	GCF_000924715.1	1379788	1379788	Boiling Springs Lake RNA-DNA hybrid virus		Complete Genome
GCF_000924435.1_ViralProj263847_genomic.fna	GCF_000924435.1	1072176	1072176	Bokeloh bat lyssavirus		Complete Genome
GCF_001746095.1_ViralProj344206_genomic.fna	GCF_001746095.1	1608041	1608041	Bole Tick Virus 2	strain=BL076	Complete Genome
GCF_001441115.1_ViralProj301252_genomic.fna	GCF_001441115.1	1608042	1608042	Bole Tick Virus 3	strain=BL199	Complete Genome
GCF_001444065.1_ViralProj302018_genomic.fna	GCF_001444065.1	1746058	1746058	Bole tick virus 4	strain=BLP-1	Complete Genome
GCF_000846085.1_ViralProj14557_genomic.fna	GCF_000846085.1	284503	284503	Bombyx mori cypovirus 1 satellite RNA		Complete Genome
GCF_000908215.1_ViralMultiSegProj196762_genomic.fna	GCF_000908215.1	328668	1285589	Bombyx mori densovirus 3		Complete Genome
GCF_000861145.1_ViralProj15444_genomic.fna	GCF_000861145.1	125788	1513210	Bombyx mori densovirus 5		Complete Genome
GCF_001271195.1_ViralProj293048_genomic.fna	GCF_001271195.1	1690666	1690666	Bombyx mori iflavirus	strain=BMI1	Complete Genome
GCF_000892755.1_ViralProj66973_genomic.fna	GCF_000892755.1	288456	288456	Bombyx mori Macula-like virus		Complete Genome
GCF_000837145.1_ViralProj14089_genomic.fna	GCF_000837145.1	271108	271108	Bombyx mori nucleopolyhedrovirus		Complete Genome
GCF_000852425.1_ViralMultiSegProj14850_genomic.fna	GCF_000852425.1	12286	12286	Boolarra virus		Complete Genome
GCF_000862865.1_ViralProj15463_genomic.fna	GCF_000862865.1	358764	358764	Border disease virus	strain=X818; Clover Lane	Complete Genome
GCF_000070465.1_ASM7046v1_genomic.fna	GCF_000070465.1	360910	521	Bordetella avium 197N	strain=197N	Complete Genome
GCF_001676705.1_ASM167670v1_genomic.fna	GCF_001676705.1	463025	463025	Bordetella bronchialis	strain=AU3182	Complete Genome
GCF_001676745.1_ASM167674v1_genomic.fna	GCF_001676745.1	463025	463025	Bordetella bronchialis	strain=AU17976	Complete Genome
GCF_000829175.1_ASM82917v1_genomic.fna	GCF_000829175.1	518	518	Bordetella bronchiseptica	strain=S798	Complete Genome
GCF_001704355.1_ASM170435v1_genomic.fna	GCF_001704355.1	518	518	Bordetella bronchiseptica	strain=I328	Complete Genome
GCF_000318015.1_ASM31801v1_genomic.fna	GCF_000318015.1	568707	518	Bordetella bronchiseptica 253	strain=253	Complete Genome
GCF_000317955.1_ASM31795v1_genomic.fna	GCF_000317955.1	1208658	518	Bordetella bronchiseptica MO149	strain=MO149	Complete Genome
GCF_000195675.1_ASM19567v1_genomic.fna	GCF_000195675.1	257310	518	Bordetella bronchiseptica RB50	strain=RB50	Complete Genome
GCF_001676725.1_ASM167672v1_genomic.fna	GCF_001676725.1	463014	463014	Bordetella flabilis	strain=AU10664	Complete Genome
GCF_002119665.1_ASM211966v1_genomic.fna	GCF_002119665.1	463040	463040	Bordetella genomosp. 13	strain=AU7206	Complete Genome
GCF_002119705.1_ASM211970v1_genomic.fna	GCF_002119705.1	463024	463024	Bordetella genomosp. 6	strain=AU22978	Complete Genome
GCF_002119685.1_ASM211968v1_genomic.fna	GCF_002119685.1	1416806	1416806	Bordetella genomosp. 8	strain=AU19157	Complete Genome
GCF_002119725.1_ASM211972v1_genomic.fna	GCF_002119725.1	1416803	1416803	Bordetella genomosp. 9	strain=AU17164	Complete Genome
GCF_002119745.1_ASM211974v1_genomic.fna	GCF_002119745.1	1416803	1416803	Bordetella genomosp. 9	strain=AU14267	Complete Genome
GCF_001078275.1_ASM107827v1_genomic.fna	GCF_001078275.1	103855	103855	Bordetella hinzii	strain=F582	Complete Genome
GCF_001078295.1_ASM107829v1_genomic.fna	GCF_001078295.1	103855	103855	Bordetella hinzii	strain=H568	Complete Genome
GCF_001704215.1_ASM170421v1_genomic.fna	GCF_001704215.1	35814	35814	Bordetella holmesii	strain=H903	Complete Genome
GCF_000765395.1_ASM76539v1_genomic.fna	GCF_000765395.1	1172205	35814	Bordetella holmesii 44057	strain=44057	Complete Genome
GCF_000612485.1_ASM61248v1_genomic.fna	GCF_000612485.1	1247649	35814	Bordetella holmesii ATCC 51541	strain=ATCC 51541	Complete Genome
GCF_000341465.2_ASM34146v2_genomic.fna	GCF_000341465.2	1266729	35814	Bordetella holmesii F627	strain=F627	Complete Genome
GCF_000341485.2_ASM34148v2_genomic.fna	GCF_000341485.2	1281885	35814	Bordetella holmesii H558	strain=H558	Complete Genome
GCF_001704255.1_ASM170425v1_genomic.fna	GCF_001704255.1	519	519	Bordetella parapertussis	strain=H904	Complete Genome
GCF_000195695.1_ASM19569v1_genomic.fna	GCF_000195695.1	257311	519	Bordetella parapertussis 12822	strain=12822	Complete Genome
GCF_000317935.1_ASM31793v1_genomic.fna	GCF_000317935.1	1208660	519	Bordetella parapertussis Bpp5	strain=Bpp5	Complete Genome
GCF_001013565.1_BPD420_genomic.fna	GCF_001013565.1	520	520	Bordetella pertussis	strain=D420	Complete Genome
GCF_001307525.1_ASM130752v1_genomic.fna	GCF_001307525.1	520	520	Bordetella pertussis	strain=B3629	Complete Genome
GCF_001307565.1_ASM130756v1_genomic.fna	GCF_001307565.1	520	520	Bordetella pertussis	strain=B3621	Complete Genome
GCF_001307585.1_ASM130758v1_genomic.fna	GCF_001307585.1	520	520	Bordetella pertussis	strain=B1838	Complete Genome
GCF_001307605.1_ASM130760v1_genomic.fna	GCF_001307605.1	520	520	Bordetella pertussis	strain=B1865	Complete Genome
GCF_001307625.1_ASM130762v1_genomic.fna	GCF_001307625.1	520	520	Bordetella pertussis	strain=B3405	Complete Genome
GCF_001307645.1_ASM130764v1_genomic.fna	GCF_001307645.1	520	520	Bordetella pertussis	strain=B3582	Complete Genome
GCF_001307665.1_ASM130766v1_genomic.fna	GCF_001307665.1	520	520	Bordetella pertussis	strain=B3585	Complete Genome
GCF_001307685.1_ASM130768v1_genomic.fna	GCF_001307685.1	520	520	Bordetella pertussis	strain=B3640	Complete Genome
GCF_001307705.1_ASM130770v1_genomic.fna	GCF_001307705.1	520	520	Bordetella pertussis	strain=B3658	Complete Genome
GCF_001307725.1_ASM130772v1_genomic.fna	GCF_001307725.1	520	520	Bordetella pertussis	strain=B3913	Complete Genome
GCF_001307745.1_ASM130774v1_genomic.fna	GCF_001307745.1	520	520	Bordetella pertussis	strain=B3921	Complete Genome
GCF_001509895.1_ASM150989v1_genomic.fna	GCF_001509895.1	520	520	Bordetella pertussis	strain=H321	Complete Genome
GCF_001509915.1_ASM150991v1_genomic.fna	GCF_001509915.1	520	520	Bordetella pertussis	strain=I979	Complete Genome
GCF_001605035.1_ASM160503v1_genomic.fna	GCF_001605035.1	520	520	Bordetella pertussis	strain=H374	Complete Genome
GCF_001605055.1_ASM160505v1_genomic.fna	GCF_001605055.1	520	520	Bordetella pertussis	strain=H378	Complete Genome
GCF_001605075.1_ASM160507v1_genomic.fna	GCF_001605075.1	520	520	Bordetella pertussis	strain=H379	Complete Genome
GCF_001605095.1_ASM160509v1_genomic.fna	GCF_001605095.1	520	520	Bordetella pertussis	strain=H380	Complete Genome
GCF_001605115.1_ASM160511v1_genomic.fna	GCF_001605115.1	520	520	Bordetella pertussis	strain=H559	Complete Genome
GCF_001605135.1_ASM160513v1_genomic.fna	GCF_001605135.1	520	520	Bordetella pertussis	strain=H375	Complete Genome
GCF_001605155.1_ASM160515v1_genomic.fna	GCF_001605155.1	520	520	Bordetella pertussis	strain=H627	Complete Genome
GCF_001605175.1_ASM160517v1_genomic.fna	GCF_001605175.1	520	520	Bordetella pertussis	strain=H489	Complete Genome
GCF_001605195.1_ASM160519v1_genomic.fna	GCF_001605195.1	520	520	Bordetella pertussis	strain=H542	Complete Genome
GCF_001605215.1_ASM160521v1_genomic.fna	GCF_001605215.1	520	520	Bordetella pertussis	strain=H561	Complete Genome
GCF_001605235.1_ASM160523v1_genomic.fna	GCF_001605235.1	520	520	Bordetella pertussis	strain=H563	Complete Genome
GCF_001605255.1_ASM160525v1_genomic.fna	GCF_001605255.1	520	520	Bordetella pertussis	strain=H622	Complete Genome
GCF_001605275.1_ASM160527v1_genomic.fna	GCF_001605275.1	520	520	Bordetella pertussis	strain=C393	Complete Genome
GCF_001605295.1_ASM160529v1_genomic.fna	GCF_001605295.1	520	520	Bordetella pertussis	strain=E476	Complete Genome
GCF_001605345.1_ASM160534v1_genomic.fna	GCF_001605345.1	520	520	Bordetella pertussis	strain=H564	Complete Genome
GCF_001605365.1_ASM160536v1_genomic.fna	GCF_001605365.1	520	520	Bordetella pertussis	strain=H788	Complete Genome
GCF_001605385.1_ASM160538v1_genomic.fna	GCF_001605385.1	520	520	Bordetella pertussis	strain=I468	Complete Genome
GCF_001605405.1_ASM160540v1_genomic.fna	GCF_001605405.1	520	520	Bordetella pertussis	strain=I469	Complete Genome
GCF_001605425.1_ASM160542v1_genomic.fna	GCF_001605425.1	520	520	Bordetella pertussis	strain=I472	Complete Genome
GCF_001605445.1_ASM160544v1_genomic.fna	GCF_001605445.1	520	520	Bordetella pertussis	strain=I476	Complete Genome
GCF_001605465.1_ASM160546v1_genomic.fna	GCF_001605465.1	520	520	Bordetella pertussis	strain=I480	Complete Genome
GCF_001605485.1_ASM160548v1_genomic.fna	GCF_001605485.1	520	520	Bordetella pertussis	strain=I483	Complete Genome
GCF_001605505.1_ASM160550v1_genomic.fna	GCF_001605505.1	520	520	Bordetella pertussis	strain=I496	Complete Genome
GCF_001605525.1_ASM160552v1_genomic.fna	GCF_001605525.1	520	520	Bordetella pertussis	strain=I498	Complete Genome
GCF_001605545.1_ASM160554v1_genomic.fna	GCF_001605545.1	520	520	Bordetella pertussis	strain=I518	Complete Genome
GCF_001605565.1_ASM160556v1_genomic.fna	GCF_001605565.1	520	520	Bordetella pertussis	strain=I521	Complete Genome
GCF_001605585.1_ASM160558v1_genomic.fna	GCF_001605585.1	520	520	Bordetella pertussis	strain=I538	Complete Genome
GCF_001605605.1_ASM160560v1_genomic.fna	GCF_001605605.1	520	520	Bordetella pertussis	strain=I539	Complete Genome
GCF_001605625.1_ASM160562v1_genomic.fna	GCF_001605625.1	520	520	Bordetella pertussis	strain=I646	Complete Genome
GCF_001605645.1_ASM160564v1_genomic.fna	GCF_001605645.1	520	520	Bordetella pertussis	strain=I656	Complete Genome
GCF_001605665.1_ASM160566v1_genomic.fna	GCF_001605665.1	520	520	Bordetella pertussis	strain=I669	Complete Genome
GCF_001605685.1_ASM160568v1_genomic.fna	GCF_001605685.1	520	520	Bordetella pertussis	strain=I707	Complete Genome
GCF_001628735.1_ASM162873v1_genomic.fna	GCF_001628735.1	520	520	Bordetella pertussis	strain=I344	Complete Genome
GCF_001686365.1_ASM168636v1_genomic.fna	GCF_001686365.1	520	520	Bordetella pertussis	strain=VA-190	Complete Genome
GCF_001686405.1_ASM168640v1_genomic.fna	GCF_001686405.1	520	520	Bordetella pertussis	strain=VA-194	Complete Genome
GCF_001686425.1_ASM168642v1_genomic.fna	GCF_001686425.1	520	520	Bordetella pertussis	strain=VA-175	Complete Genome
GCF_001686445.1_ASM168644v1_genomic.fna	GCF_001686445.1	520	520	Bordetella pertussis	strain=VA-150	Complete Genome
GCF_001686465.1_ASM168646v1_genomic.fna	GCF_001686465.1	520	520	Bordetella pertussis	strain=VA-52	Complete Genome
GCF_001686485.1_ASM168648v1_genomic.fna	GCF_001686485.1	520	520	Bordetella pertussis	strain=VA-198	Complete Genome
GCF_001686505.1_ASM168650v1_genomic.fna	GCF_001686505.1	520	520	Bordetella pertussis	strain=VA-09	Complete Genome
GCF_001686525.1_ASM168652v1_genomic.fna	GCF_001686525.1	520	520	Bordetella pertussis	strain=VA-15	Complete Genome
GCF_001686545.1_ASM168654v1_genomic.fna	GCF_001686545.1	520	520	Bordetella pertussis	strain=VA-18	Complete Genome
GCF_001686565.1_ASM168656v1_genomic.fna	GCF_001686565.1	520	520	Bordetella pertussis	strain=VA-62	Complete Genome
GCF_001686585.1_ASM168658v1_genomic.fna	GCF_001686585.1	520	520	Bordetella pertussis	strain=VA-145	Complete Genome
GCF_001686605.1_ASM168660v1_genomic.fna	GCF_001686605.1	520	520	Bordetella pertussis	strain=VA-010	Complete Genome
GCF_001686625.1_ASM168662v1_genomic.fna	GCF_001686625.1	520	520	Bordetella pertussis	strain=VA-UT25Sm1	Complete Genome
GCF_001687385.1_ASM168738v1_genomic.fna	GCF_001687385.1	520	520	Bordetella pertussis	strain=B203	Complete Genome
GCF_001687405.1_ASM168740v1_genomic.fna	GCF_001687405.1	520	520	Bordetella pertussis	strain=B202	Complete Genome
GCF_001831395.1_ASM183139v1_genomic.fna	GCF_001831395.1	520	520	Bordetella pertussis	strain=J445	Complete Genome
GCF_001831415.1_ASM183141v1_genomic.fna	GCF_001831415.1	520	520	Bordetella pertussis	strain=J446	Complete Genome
GCF_001831435.1_ASM183143v1_genomic.fna	GCF_001831435.1	520	520	Bordetella pertussis	strain=J447	Complete Genome
GCF_001831455.1_ASM183145v1_genomic.fna	GCF_001831455.1	520	520	Bordetella pertussis	strain=J448	Complete Genome
GCF_001984925.1_ASM198492v1_genomic.fna	GCF_001984925.1	520	520	Bordetella pertussis	strain=C571	Complete Genome
GCF_001984945.1_ASM198494v1_genomic.fna	GCF_001984945.1	520	520	Bordetella pertussis	strain=C958	Complete Genome
GCF_001984965.1_ASM198496v1_genomic.fna	GCF_001984965.1	520	520	Bordetella pertussis	strain=D521	Complete Genome
GCF_001984985.1_ASM198498v1_genomic.fna	GCF_001984985.1	520	520	Bordetella pertussis	strain=D879	Complete Genome
GCF_001985005.1_ASM198500v1_genomic.fna	GCF_001985005.1	520	520	Bordetella pertussis	strain=E150	Complete Genome
GCF_001985025.1_ASM198502v1_genomic.fna	GCF_001985025.1	520	520	Bordetella pertussis	strain=E555	Complete Genome
GCF_001985045.1_ASM198504v1_genomic.fna	GCF_001985045.1	520	520	Bordetella pertussis	strain=E587	Complete Genome
GCF_001985065.1_ASM198506v1_genomic.fna	GCF_001985065.1	520	520	Bordetella pertussis	strain=E809	Complete Genome
GCF_001985085.1_ASM198508v1_genomic.fna	GCF_001985085.1	520	520	Bordetella pertussis	strain=E976	Complete Genome
GCF_001985105.1_ASM198510v1_genomic.fna	GCF_001985105.1	520	520	Bordetella pertussis	strain=F011	Complete Genome
GCF_001985125.1_ASM198512v1_genomic.fna	GCF_001985125.1	520	520	Bordetella pertussis	strain=F034	Complete Genome
GCF_001985145.1_ASM198514v1_genomic.fna	GCF_001985145.1	520	520	Bordetella pertussis	strain=F658	Complete Genome
GCF_001985165.1_ASM198516v1_genomic.fna	GCF_001985165.1	520	520	Bordetella pertussis	strain=F670	Complete Genome
GCF_001985205.1_ASM198520v1_genomic.fna	GCF_001985205.1	520	520	Bordetella pertussis	strain=F687	Complete Genome
GCF_001985225.1_ASM198522v1_genomic.fna	GCF_001985225.1	520	520	Bordetella pertussis	strain=F948	Complete Genome
GCF_001985245.1_ASM198524v1_genomic.fna	GCF_001985245.1	520	520	Bordetella pertussis	strain=H520	Complete Genome
GCF_001985265.1_ASM198526v1_genomic.fna	GCF_001985265.1	520	520	Bordetella pertussis	strain=H579	Complete Genome
GCF_001985285.1_ASM198528v1_genomic.fna	GCF_001985285.1	520	520	Bordetella pertussis	strain=H637	Complete Genome
[truncated: 13,005 more rows]

## Sheet: KrakenFilterDB2_Vertebrates
File Name	Accession #	TaxonID	Species TaxonID	Organism	Strain Specific	Assembly Level
GCF_000242695.1_LepOcu1_genomic.fna.gz	GCF_000242695.1	7918	7918	Lepisosteus oculatus		Chromosome
GCF_000002035.6_GRCz11_genomic.fna.gz	GCF_000002035.6	7955	7955	Danio rerio		Chromosome
GCF_000951615.1_common_carp_genome_genomic.fna.gz	GCF_000951615.1	7962	7962	Cyprinus carpio		Chromosome
GCF_001660625.1_IpCoco_1.2_genomic.fna.gz	GCF_001660625.1	7998	7998	Ictalurus punctatus	breed=USDA103	Chromosome
GCF_000721915.3_Eluc_V3_genomic.fna.gz	GCF_000721915.3	8010	8010	Esox lucius		Chromosome
GCF_002021735.1_Okis_V1_genomic.fna.gz	GCF_002021735.1	8019	8019	Oncorhynchus kisutch		Chromosome
GCF_002163495.1_Omyk_1.0_genomic.fna.gz	GCF_002163495.1	8022	8022	Oncorhynchus mykiss		Chromosome
GCF_000233375.1_ICSASG_v2_genomic.fna.gz	GCF_000233375.1	8030	8030	Salmo salar	breed=double haploid	Chromosome
GCF_000633615.1_Guppy_female_1.0_MT_genomic.fna.gz	GCF_000633615.1	8081	8081	Poecilia reticulata	strain=Guanapo	Chromosome
GCF_000313675.1_ASM31367v1_genomic.fna.gz	GCF_000313675.1	8090	8090	Oryzias latipes	strain=Hd-rR	Chromosome
GCF_001858045.1_ASM185804v2_genomic.fna.gz	GCF_001858045.1	8128	8128	Oreochromis niloticus		Chromosome
GCF_001663975.1_Xenopus_laevis_v2_genomic.fna.gz	GCF_001663975.1	8355	8355	Xenopus laevis	strain=J	Chromosome
GCF_000004195.3_Xenopus_tropicalis_v9.1_genomic.fna.gz	GCF_000004195.3	8364	8364	Xenopus tropicalis	strain=Nigerian	Chromosome
GCF_000241765.3_Chrysemys_picta_bellii-3.0.3_genomic.fna.gz	GCF_000241765.3	8478	8479	Chrysemys picta bellii		Chromosome
GCF_002078875.1_NumMel1.0_genomic.fna.gz	GCF_002078875.1	8996	8996	Numida meleagris	breed=g44 Domestic line	Chromosome
GCF_000002315.4_Gallus_gallus-5.0_genomic.fna.gz	GCF_000002315.4	9031	9031	Gallus gallus	breed=Red Jungle fowl, inbred line UCD001	Chromosome
GCF_000146605.2_Turkey_5.0_genomic.fna.gz	GCF_000146605.2	9103	9103	Meleagris gallopavo	breed=Aviagen turkey brand Nicholas breeding stock	Chromosome
GCF_001522545.2_Parus_major1.1_genomic.fna.gz	GCF_001522545.2	9157	9157	Parus major		Chromosome
GCF_000090745.1_AnoCar2.0_genomic.fna.gz	GCF_000090745.1	28377	28377	Anolis carolinensis		Chromosome
GCF_000180615.1_FUGU5_genomic.fna.gz	GCF_000180615.1	31033	31033	Takifugu rubripes		Chromosome
GCF_000151805.1_Taeniopygia_guttata-3.2.4_genomic.fna.gz	GCF_000151805.1	59729	59729	Taeniopygia guttata		Chromosome
GCF_000247815.1_FicAlb1.5_genomic.fna.gz	GCF_000247815.1	59894	59894	Ficedula albicollis		Chromosome
GCF_001577835.1_Coturnix_japonica_2.0_genomic.fna.gz	GCF_001577835.1	93934	93934	Coturnix japonica		Chromosome
GCF_001465895.1_Nfu_20140520_genomic.fna.gz	GCF_001465895.1	105023	105023	Nothobranchius furzeri	strain=GRZ	Chromosome
GCF_000523025.1_Cse_v1.0_genomic.fna.gz	GCF_000523025.1	244447	244447	Cynoglossus semilaevis		Chromosome
GCF_000002275.2_Ornithorhynchus_anatinus_5.0.1_genomic.fna.gz	GCF_000002275.2	9258	9258	Ornithorhynchus anatinus		Chromosome
GCF_000004665.1_Callithrix_jacchus-3.2_genomic.fna.gz	GCF_000004665.1	9483	9483	Callithrix jacchus		Chromosome
GCF_000364345.1_Macaca_fascicularis_5.0_genomic.fna.gz	GCF_000364345.1	9541	9541	Macaca fascicularis		Chromosome
GCF_000772875.2_Mmul_8.0.1_genomic.fna.gz	GCF_000772875.2	9544	9544	Macaca mulatta		Chromosome
GCF_000264685.3_Panu_3.0_genomic.fna.gz	GCF_000264685.3	9555	9555	Papio anubis		Chromosome
GCF_000151905.2_gorGor4_genomic.fna.gz	GCF_000151905.2	9595	9593	Gorilla gorilla gorilla		Chromosome
GCF_000258655.2_panpan1.1_genomic.fna.gz	GCF_000258655.2	9597	9597	Pan paniscus		Chromosome
GCF_000001515.7_Pan_tro_3.0_genomic.fna.gz	GCF_000001515.7	9598	9598	Pan troglodytes		Chromosome
GCF_000001545.4_P_pygmaeus_2.0.2_genomic.fna.gz	GCF_000001545.4	9601	9601	Pongo abelii		Chromosome
GCF_000001405.37_GRCh38.p11_genomic.fna.gz	GCF_000001405.37	9606	9606	Homo sapiens		Chromosome
GCF_000306695.2_CHM1_1.1_genomic.fna.gz	GCF_000306695.2	9606	9606	Homo sapiens		Chromosome
GCF_000002285.3_CanFam3.1_genomic.fna.gz	GCF_000002285.3	9615	9612	Canis lupus familiaris	breed=boxer	Chromosome
GCF_000181335.3_Felis_catus_9.0_genomic.fna.gz	GCF_000181335.3	9685	9685	Felis catus	breed=Abyssinian	Chromosome
GCF_000002305.2_EquCab2.0_genomic.fna.gz	GCF_000002305.2	9796	9796	Equus caballus	breed=thoroughbred	Chromosome
GCF_000003025.6_Sscrofa11.1_genomic.fna.gz	GCF_000003025.6	9823	9823	Sus scrofa	breed=Duroc	Chromosome
GCF_000003055.6_Bos_taurus_UMD_3.1.1_genomic.fna.gz	GCF_000003055.6	9913	9913	Bos taurus	breed=Hereford	Chromosome
GCF_000003205.7_Btau_5.0.1_genomic.fna.gz	GCF_000003205.7	9913	9913	Bos taurus	breed=Hereford	Chromosome
GCF_000247795.1_Bos_indicus_1.0_genomic.fna.gz	GCF_000247795.1	9915	9915	Bos indicus	breed=Nelore	Chromosome
GCF_001704415.1_ARS1_genomic.fna.gz	GCF_001704415.1	9925	9925	Capra hircus	breed=San Clemente	Chromosome
GCF_000298735.2_Oar_v4.0_genomic.fna.gz	GCF_000298735.2	9940	9940	Ovis aries	breed=Texel	Chromosome
GCF_000003625.3_OryCun2.0_genomic.fna.gz	GCF_000003625.3	9986	9986	Oryctolagus cuniculus	breed=Thorbecke inbred	Chromosome
GCF_900094665.1_CAROLI_EIJ_v1.1_genomic.fna.gz	GCF_900094665.1	10089	10089	Mus caroli		Chromosome
GCF_000001635.26_GRCm38.p6_genomic.fna.gz	GCF_000001635.26	10090	10090	Mus musculus		Chromosome
GCF_900095145.1_PAHARI_EIJ_v1.1_genomic.fna.gz	GCF_900095145.1	10093	10093	Mus pahari		Chromosome
GCF_000001895.5_Rnor_6.0_genomic.fna.gz	GCF_000001895.5	10116	10116	Rattus norvegicus	strain=mixed	Chromosome
GCF_000002265.2_Rn_Celera_genomic.fna.gz	GCF_000002265.2	10116	10116	Rattus norvegicus	strain=BN; Sprague-Dawley	Chromosome
GCF_000002295.2_MonDom5_genomic.fna.gz	GCF_000002295.2	13616	13616	Monodelphis domestica		Chromosome
GCF_000165445.2_Mmur_3.0_genomic.fna.gz	GCF_000165445.2	30608	30608	Microcebus murinus		Chromosome
GCF_000409795.2_Chlorocebus_sabeus_1.1_genomic.fna.gz	GCF_000409795.2	60711	60711	Chlorocebus sabaeus		Chromosome
GCF_000146795.2_Nleu_3.0_genomic.fna.gz	GCF_000146795.2	61853	61853	Nomascus leucogenys		Chromosome
GCF_000317375.1_MicOch1.0_genomic.fna.gz	GCF_000317375.1	79684	79684	Microtus ochrogaster		Chromosome
